# Supplementary material for: Mapping the Global Distribution of Livestock
Source: PubMed Central journal article supplement (PMC4038494; doi:10.1371/journal.pone.0096084), 2014-05-29
Supplement: pone.0096084.s001.pdf [file pone.0096084.s001.pdf]

## Supplementary information 1 – Specifications for the continental tiles.

| Tile          | Xmin | Xmax | Ymin | Ymax | No. rows | No. columns | No. pixels  | No. countries |
|---------------|------|------|------|------|----------|-------------|-------------|---------------|
| Africa        | -18  | 52   | -35  | 38   | 8,760    | 8,400       | 73,584,000  | 57            |
| Asia          | 19   | 180  | -12  | 85   | 11,640   | 19,320      | 224,884,800 | 61            |
| Europe        | -32  | 34   | 34   | 85   | 6,120    | 7,920       | 48,470,400  | 42            |
| North America | -180 | -50  | 5    | 85   | 9,600    | 1,560       | 149,760,000 | 33            |
| Oceania       | 94   | 180  | -55  | 21   | 9,120    | 10,320      | 94,118,400  | 26*           |
| South America | -95  | -30  | -60  | 15   | 9,000    | 7,800       | 70,200,000  | 16            |

\* Because of the sparse distribution of livestock in the countries of Oceania, the model of this continental tile actually includes 4 Asian countries; allowing for an adequate number of training samples. The predicted values for those Asian countries are however not used.

### Country polygons in Africa:

Algeria; Angola; Benin; Botswana; British Indian Ocean Territory; Burkina Faso; Burundi; Cameroon; Cape Verde; Central African Republic; Chad; Comoros; Congo; Côte d'Ivoire; Democratic Republic of the Congo; Djibouti; Egypt; Equatorial Guinea; Eritrea; Ethiopia; Gabon; Gambia; Ghana; Guinea; Guinea-Bissau; Kenya; Lesotho; Liberia; Libya; Madagascar; Malawi; Mali; Mauritania; Mauritius; Mayotte; Morocco; Mozambique; Namibia; Niger; Nigeria; Réunion; Rwanda; Saint Helena; Sao Tome and Principe; Senegal; Seychelles; Sierra Leone; Somalia; South Africa; Sudan; Swaziland; Togo; Tunisia; Uganda; United Republic of Tanzania; Zambia; Zimbabwe.

### Country polygons in Asia:

Afghanistan; Armenia; Azerbaijan; Bahrain; Bangladesh; Belarus; Bhutan; Brunei Darussalam; Bulgaria; Cambodia; China; Christmas Island; Cocos (Keeling) Islands; Cyprus; Dem People's Republic of Korea; Georgia; India; Indonesia; Iran (Islamic Republic of); Iraq; Israel; Japan; Jordan; Kazakhstan; Kuril islands; Kuwait; Kyrgyzstan; Lao People's Democratic Republic; Lebanon; Liancourt Rock; Malaysia; Maldives; Mongolia; Myanmar; Nepal; Oman; Pakistan; Paracel Islands; Philippines; Qatar; Republic of Korea; Republic of Moldova; Romania; Russian Federation; Saudi Arabia; Scarborough Reef; Singapore; Senkaku Islands; Spratly Islands; Sri Lanka; Syrian Arab Republic; Tajikistan; Thailand; Timor-Leste; Turkey; Turkmenistan; Ukraine; United Arab Emirates; Uzbekistan; Viet Nam; Yemen.

### Country polygons in Europe:

Albania; Andorra; Austria; Belgium; Bosnia and Herzegovina; Croatia; Czech Republic; Denmark; Estonia; Faroe Islands; Finland; France; Germany; Gibraltar; Greece; Holy See; Hungary; Iceland; Ireland; Isle of Man; Italy; Latvia; Liechtenstein; Lithuania; Luxembourg; Malta; Monaco; Montenegro; Netherlands; Norway; Poland; Portugal; San Marino; Serbia; Slovakia; Slovenia; Spain; Svalbard and Jan Mayen Islands; Sweden; Switzerland; The former Yugoslav Republic of Macedonia; United Kingdom.

### Country polygons in North America:

Anguilla; Antigua and Barbuda; Bahamas; Barbados; Belize; Bermuda; British Virgin Islands; Canada; Cayman Islands; Costa Rica; Cuba; Dominica; Dominican Republic; El Salvador; Grenada; Guadeloupe; Guatemala; Haiti; Honduras; Jamaica; Martinique; Mexico; Montserrat; Netherlands Antilles; Nicaragua; Panama; Puerto Rico; Saint Kitts and Nevis; Saint Lucia; Saint Vincent and the Grenadines; Turks and Caicos Islands; United States of America; United States Virgin Islands.

### Country polygons in Oceania:

American Samoa; Australia; Cook Islands; Fiji; French Polynesia; Guam; Kiribati; Marshall Islands; Micronesia (Federated States of); Nauru; New Caledonia; New Zealand; Niue; Norfolk Island; Northern Mariana Islands; Palau; Papua New Guinea; Pitcairn Islands; Samoa; Solomon Islands; Tokelau; Tonga; Tuvalu; Vanuatu; Wake Island.

### Country polygons in South America:

Argentina; Aruba; Bolivia (Plurinational State of); Brazil; Chile; Colombia; Ecuador; Falkland Islands (Malvinas); French Guiana; Guyana; Paraguay; Peru; Suriname; Trinidad and Tobago; Uruguay; Venezuela (Bolivarian Republic of).
