# Supplementary material for: Mapping the Global Distribution of Livestock
Source: PubMed Central journal article supplement (PMC4038494; doi:10.1371/journal.pone.0096084), 2014-05-29
Supplement: pone.0096084.s002.pdf [file pone.0096084.s002.pdf]

**Supplementary information 2** – Detailed information on MODIS-derived predictor variables (source, derived Fourier variables, image values and rescaling if applicable).

| <b>MODIS imagery</b> | <b>Estimated parameter</b>                                                                                | <b>Number of variables</b> | <b>Estimate Fourier parameter</b>                                                                                                                                                                             | <b>Number of variables</b> | <b>Image values</b>            |
|----------------------|-----------------------------------------------------------------------------------------------------------|----------------------------|---------------------------------------------------------------------------------------------------------------------------------------------------------------------------------------------------------------|----------------------------|--------------------------------|
| MIR                  | Mean, Minimum, Maximum, Variance,                                                                         | 4                          | Annual bi-annual, tri-annual amplitude; annual bi-annual, tri-annual phase<br>Contribution to total variance for combined annual, bi-annual, tri-annual amplitude and phase and total variance of combination | 6<br>4                     | Reflectance values * 10,000    |
| LST (day, night)     | Mean, Minimum, Maximum, Variance,                                                                         | 4                          | Annual bi-annual, tri-annual amplitude; annual bi-annual, tri-annual phase<br>Contribution to total variance for combined annual, bi-annual, tri-annual amplitude and phase and total variance of combination | 6<br>4                     | (Degree Centigrade + 273) * 50 |
| NDVI and EVI         | Mean, Minimum, Maximum                                                                                    | 3 + 3                      | Annual bi-annual, tri-annual amplitude; annual bi-annual, tri-annual phase<br>Contribution to total variance for combined annual, bi-annual, tri-annual amplitude and phase and total variance of combination | 6 + 6<br>4 + 4             | Index Value * 1,000            |
| NDVI and EVI         | Variance                                                                                                  | 1 + 1                      | -----                                                                                                                                                                                                         |                            | Value * 10,000                 |
| Green-up             | Onset green-up event for annual cycle 1 (1 January - 30 June) and annual cycle 2 (1 July - 31 December)   | 1 + 1                      | -----                                                                                                                                                                                                         |                            | Julian day                     |
| Senescence           | Onset senescence event for annual cycle 1 (1 January - 30 June) and annual cycle 2 (1 July - 31 December) | 1 + 1                      | -----                                                                                                                                                                                                         |                            | Julian day                     |
