# Supplementary material for: Mapping the Global Distribution of Livestock
Source: PubMed Central journal article supplement (PMC4038494; doi:10.1371/journal.pone.0096084), 2014-05-29
Supplement: pone.0096084.s003.pdf [file pone.0096084.s003.pdf]

**Supplementary information 3** – Islamic countries in relation to modelling the distributions of pigs. Countries emboldened in red are those flagged with zero values in modelling the distribution of pigs. (Source: Adapted from Wikipedia [http://en.wikipedia.org/wiki/List\\_of\\_Muslim-majority\\_countries](http://en.wikipedia.org/wiki/List_of_Muslim-majority_countries)).

| Country                           | Human pop.<br>In thousands | Muslims<br>% | Sunni<br>%     | Shia<br>%      | Religion &<br>State   | Data for pigs |             | Data for other<br>species |
|-----------------------------------|----------------------------|--------------|----------------|----------------|-----------------------|---------------|-------------|---------------------------|
|                                   |                            |              |                |                |                       | GLIMS         | FAOSTAT*    | FAOSTAT*                  |
| <b>Afghanistan</b>                | <b>28,396</b>              | <b>99.8</b>  | <b>85-90</b>   | <b>10-15</b>   | <b>Islamic state</b>  | <b>n.d.</b>   | <b>n.d.</b> | <b>yes</b>                |
| Albania                           | 3,170                      | 82.1         | 95             | 5              | None                  | yes           | yes         | yes                       |
| Algeria                           | 34,895                     | 98.2         | 99             | 1              | State Religion        | yes           | yes         | yes                       |
| Azerbaijan                        | 8,676                      | 98.4         | 25-35          | 67-75          | Secular               | yes           | yes         | yes                       |
| <b>Bahrain</b>                    | <b>1,047</b>               | <b>81.2</b>  | <b>25-35</b>   | <b>65-75</b>   | <b>State Religion</b> | <b>n.d.</b>   | <b>n.d.</b> | <b>yes</b>                |
| Bangladesh                        | 142,319                    | 90.4         | 99             | 1              | State Religion        | yes           | n.d.        | yes                       |
| Brunei Darussalam                 | 381                        | 51.9         | 99             | 1              | State Religion        | n.d.          | yes         | yes                       |
| Burkina Faso                      | 13,228                     | 58.9         | 99             | 1              | Secular               | yes           | yes         | yes                       |
| Chad                              | 5,042                      | 55.7         | 99             | 1              | Secular               | yes           | yes         | yes                       |
| <b>Comoros</b>                    | <b>798</b>                 | <b>98.3</b>  | <b>99</b>      | <b>1</b>       | <b>State Religion</b> | <b>n.d.</b>   | <b>n.d.</b> | <b>yes</b>                |
| Cyprus                            | 288                        | n.d.         | n.d.           | n.d.           | Secular               | yes           | yes         | yes                       |
| <b>Djibouti</b>                   | <b>496</b>                 | <b>97.0</b>  | <b>99</b>      | <b>1</b>       | <b>Secular</b>        | <b>n.d.</b>   | <b>n.d.</b> | <b>yes</b>                |
| Gambia                            | 1,700                      | 95.3         | 99             | 1              | Secular               | yes           | yes         | yes                       |
| Guinea                            | 10,211                     | 84.2         | 99             | 1              | Secular               | yes           | yes         | yes                       |
| Indonesia                         | 228,582                    | 88.1         | 99             | 1              | None                  | yes           | yes         | yes                       |
| <b>Iran (Islamic Republic of)</b> | <b>76,923</b>              | <b>99.6</b>  | <b>5-10</b>    | <b>90-95</b>   | <b>Islamic state</b>  | <b>n.d.</b>   | <b>n.d.</b> | <b>yes</b>                |
| <b>Iraq</b>                       | <b>31,234</b>              | <b>98.6</b>  | <b>30-35</b>   | <b>65-70</b>   | <b>Secular</b>        | <b>n.d.</b>   | <b>n.d.</b> | <b>yes</b>                |
| <b>Jordan</b>                     | <b>5,569</b>               | <b>98.8</b>  | <b>99</b>      | <b>1</b>       | <b>State Religion</b> | <b>n.d.</b>   | <b>n.d.</b> | <b>yes</b>                |
| Kazakhstan                        | 16,433                     | 56.4         | 99             | 1              | Secular               | yes           | yes         | yes                       |
| <b>Kuwait</b>                     | <b>3,400</b>               | <b>86.4</b>  | <b>75 - 80</b> | <b>20 - 25</b> | <b>State Religion</b> | <b>n.d.</b>   | <b>n.d.</b> | <b>yes</b>                |
| Kyrgyzstan                        | 5,357                      | 88.8         | 99             | 1              | Secular               | yes           | yes         | yes                       |
| Lebanon                           | 4,196                      | 59.7         | 45 - 55        | 45 - 55        | None                  | n.d.          | yes         | yes                       |
| <b>Libyan Arab Jamahiriya</b>     | <b>6,174</b>               | <b>96.6</b>  | <b>99</b>      | <b>1</b>       | <b>State Religion</b> | <b>n.d.</b>   | <b>n.d.</b> | <b>yes</b>                |

|                                 |                |             |              |              |                       |             |             |            |
|---------------------------------|----------------|-------------|--------------|--------------|-----------------------|-------------|-------------|------------|
| Malaysia                        | 28,300         | 61.4        | 98           | 2            | State Religion        | yes         | yes         | yes        |
| <b>Maldives</b>                 | <b>350</b>     | <b>98.4</b> | <b>99</b>    | <b>1</b>     | <b>State Religion</b> | <b>n.d.</b> | <b>n.d.</b> | <b>no</b>  |
| Mali                            | 11,995         | 92.4        | 99           | 1            | Secular               | yes         | yes         | yes        |
| <b>Mauritania</b>               | <b>3,124</b>   | <b>99.2</b> | <b>99</b>    | <b>1</b>     | <b>Islamic state</b>  | <b>n.d.</b> | <b>n.d.</b> | <b>yes</b> |
| <b>Mayotte</b>                  | <b>194</b>     | <b>98.8</b> | <b>99</b>    | <b>1</b>     | <b>n.d.</b>           | <b>n.d.</b> | <b>n.d.</b> | <b>no</b>  |
| Morocco                         | 33,723         | 99.9        | 99           | 1            | State Religion        | yes         | yes         | yes        |
| Niger                           | 13,273         | 98.3        | 99           | 1            | Secular               | yes         | yes         | yes        |
| Nigeria                         | 155,216        | 47.9        | 95           | 5            | Secular               | yes         | yes         | yes        |
| <b>Oman</b>                     | <b>2,577</b>   | <b>87.7</b> | <b>90-95</b> | <b>5-10</b>  | <b>State Religion</b> | <b>n.d.</b> | <b>n.d.</b> | <b>yes</b> |
| <b>Pakistan</b>                 | <b>172,800</b> | <b>96.4</b> | <b>85-90</b> | <b>10-15</b> | <b>Islamic state</b>  | <b>n.d.</b> | <b>n.d.</b> | <b>yes</b> |
| <b>Qatar</b>                    | <b>744</b>     | <b>77.5</b> | <b>90</b>    | <b>10</b>    | <b>State Religion</b> | <b>n.d.</b> | <b>n.d.</b> | <b>yes</b> |
| <b>Saudi Arabia</b>             | <b>27,601</b>  | <b>97.1</b> | <b>85-90</b> | <b>10-15</b> | <b>Islamic state</b>  | <b>n.d.</b> | <b>n.d.</b> | <b>yes</b> |
| Senegal                         | 11,658         | 95.9        | 99           | 1            | Secular               | yes         | yes         | yes        |
| Sierra Leone                    | 6,295          | 71.5        | 99           | 1            | None                  | yes         | yes         | yes        |
| Somalia                         | 9,559          | 98.6        | 99           | 1            | Islamic state         | yes         | yes         | yes        |
| <b>Syrian Arab Republic</b>     | <b>22,505</b>  | <b>92.8</b> | <b>80-85</b> | <b>15-20</b> | <b>None</b>           | <b>n.d.</b> | <b>n.d.</b> | <b>yes</b> |
| Tajikistan                      | 7,216          | 99.0        | 93           | 7            | State Religion        | yes         | yes         | yes        |
| Tunisia                         | 10,384         | 99.8        | 99           | 1            | State Religion        | n.d.        | n.d.        | yes        |
| Turkey                          | 73,723         | 98.6        | 85-90        | 10-15        | Secular               | yes         | yes         | yes        |
| Turkmenistan                    | 5,433          | 93.3        | 33           | 1            | Secular               | n.d.        | n.d.        | yes        |
| <b>United Arab Emirates</b>     | <b>5,433</b>   | <b>76.0</b> | <b>90</b>    | <b>10</b>    | <b>State Religion</b> | <b>n.d.</b> | <b>n.d.</b> | <b>yes</b> |
| Uzbekistan                      | 27,606         | 96.5        | 99           | 1            | Secular               | yes         | yes         | yes        |
| <b>West Bank and Gaza Strip</b> | <b>4,169</b>   | <b>97.5</b> | <b>99</b>    | <b>1</b>     | <b>None</b>           | <b>n.d.</b> | <b>n.d.</b> | <b>yes</b> |
| <b>Yemen</b>                    | <b>23,580</b>  | <b>99.0</b> | <b>60-65</b> | <b>35-40</b> | <b>Islamic state</b>  | <b>n.d.</b> | <b>n.d.</b> | <b>yes</b> |
| <b>Sudan</b>                    | <b>43,940</b>  | <b>71.4</b> | <b>99</b>    | <b>1</b>     | <b>None</b>           | <b>0</b>    | <b>n.d.</b> | <b>yes</b> |
| Egypt                           | 79,090         | 94.7        | 99           | 1            | State Religion        | yes         | yes         | yes        |

\* FAOSTAT data are taken from the same year from which GLIMS data are available
