# Supplementary material for: Mapping the Global Distribution of Livestock
Source: PubMed Central journal article supplement (PMC4038494; doi:10.1371/journal.pone.0096084), 2014-05-29
Supplement: pone.0096084.s004.pdf [file pone.0096084.s004.pdf]

**Supplementary information 4 – Aggregate information on sub-national statistics (year and level of observation) by continental tile and species.**

| Tile                 | Species  | Total Polygons | Years for sub-national statistics (range) | Available level of detail for sub-national statistics |         |         |         |        |
|----------------------|----------|----------------|-------------------------------------------|-------------------------------------------------------|---------|---------|---------|--------|
|                      |          |                |                                           | Level 0                                               | Level 1 | Level 2 | Level 3 | Other* |
| <b>Africa</b>        | Cattle   | 7,658          | 1983 - 2011                               | 12                                                    | 31      | 17      | 3       | 3      |
|                      | Chickens | 6,760          | 1990 - 2010                               | 25                                                    | 24      | 15      | 1       | 1      |
|                      | Pigs     | 7,992          | 1990 - 2010                               | 19                                                    | 23      | 20      | 3       | 1      |
|                      | Ducks    | n.a.           | n.a.                                      | n.a.                                                  | n.a.    | n.a.    | n.a.    | n.a.   |
| <b>Asia</b>          | Cattle   | 19,506         | 1997 - 2012                               | 17                                                    | 25      | 16      | 5       | 1      |
|                      | Chickens | 23,870         | 1996 - 2011                               | 33                                                    | 15      | 9       | 3       | 5      |
|                      | Pigs     | 17,802         | 2001 - 2011                               | 34                                                    | 14      | 11      | 4       | 2      |
|                      | Ducks    | 23,887         | 1996 - 2010                               | 43                                                    | 7       | 7       | 3       | 5      |
| <b>Europe</b>        | Cattle   | 13,857         | 2000 - 2010                               | 11                                                    | 13      | 16      | 2       | 3      |
|                      | Chickens | 9,741          | 2000 - 2010                               | 12                                                    | 15      | 14      | 1       | 3      |
|                      | Pigs     | 9,981          | 2000 - 2010                               | 11                                                    | 12      | 17      | 1       | 4      |
|                      | Ducks    | 636            | 2000 - 2010                               | 11                                                    | 12      | 17      | 1       | 4      |
| <b>North America</b> | Cattle   | 6,902          | 1993 - 2009                               | 15                                                    | 10      | 8       | ---     | 1      |
|                      | Chickens | 6,827          | 2000 - 2009                               | 21                                                    | 4       | 8       | ---     | 1      |
|                      | Pigs     | 6,839          | 2000 - 2009                               | 18                                                    | 7       | 8       | ---     | 1      |
|                      | Ducks    | 6,308          | 2000 - 2009                               | 18                                                    | 7       | 8       | ---     | 1      |
| <b>Oceania</b>       | Cattle   | 1,744          | 1989 - 2010                               | 21                                                    | 5       | ---     | ---     | 1      |
|                      | Chickens | 1,747          | 2001 - 2007                               | 21                                                    | 5       | ---     | ---     | 1      |
|                      | Pigs     | 275            | 2001 - 2010                               | 21                                                    | 4       | 1       | ---     | 1      |
|                      | Ducks    | 1,760          | 2001 - 2009                               | 21                                                    | 3       | 2       | ---     | 1      |
| <b>South America</b> | Cattle   | 7,217          | 1994 - 2010                               | 3                                                     | 6       | 5       | 1       | 1      |
|                      | Chickens | 6,914          | 1994 - 2009                               | 4                                                     | 7       | 4       | ---     | 1      |
|                      | Pigs     | 7,217          | 1994 - 2010                               | 2                                                     | 6       | 4       | 1       | 3      |
|                      | Ducks    | n.a.           | n.a.                                      | n.a.                                                  | n.a.    | n.a.    | n.a.    | n.a.   |

\*This may refer to sub-national statistics at a higher level of disaggregation than level 3 or sub-national statistics associated with administrative boundaries other than the GAUL. In the latter case, the boundary files are edited to ensure correspondence of national boundaries to those in GAUL.
