# Supplementary material for: Mapping the Global Distribution of Livestock
Source: PubMed Central journal article supplement (PMC4038494; doi:10.1371/journal.pone.0096084), 2014-05-29
Supplement: pone.0096084.s005.pdf [file pone.0096084.s005.pdf]

Supplementary information 5a – Country details on sub-national statistics for cattle (year and level of observation) by continental tile.

**Africa Tile**

| COUNTRY                          | YEAR | LEVEL | Totals in GLIMS | SOURCE                                                                                                                                                                                                                                                                              |
|----------------------------------|------|-------|-----------------|-------------------------------------------------------------------------------------------------------------------------------------------------------------------------------------------------------------------------------------------------------------------------------------|
| Algeria                          | 2002 | 1     | 1,345,593       | Direction des Services Vétérinaires - Ministère de l'Agriculture et du Développement Rural 2003 (GLIMS data warehouse)                                                                                                                                                              |
| Angola                           | 2011 | 1     | 4,586,569       | CountrySTAT - Food and agriculture data network: Número de animais vivos by Ano, Especie, Nivel administrativo. Online data: <a href="http://countrystat.org/home.aspx?c=AGO&amp;ta=007SPD035&amp;tr=21">http://countrystat.org/home.aspx?c=AGO&amp;ta=007SPD035&amp;tr=21</a>      |
| Benin                            | 2011 | 2     | 2,058,000       | CountrySTAT - Food and agriculture data network: Élevage - Total des effectifs d'animaux vivants 2010 -2012. Online data: <a href="http://www.countrystat.org/home.aspx?c=BEN&amp;ta=053SPD135&amp;tr=21">http://www.countrystat.org/home.aspx?c=BEN&amp;ta=053SPD135&amp;tr=21</a> |
| Botswana                         | 2010 | 2     | 2,249,364       | Central Statistics Office of Botswana: 2009 and 2010 Annual Agricultural Surveys (GLIMS data warehouse)                                                                                                                                                                             |
| Burkina Faso                     | 2009 | 2     | 8,233,900       | Ministère de l'économie et de développement, Direction General des Prévisions et des Statistiques Agricoles: Les régions en chiffres, 2008 & 2010 (GLIMS data warehouse)                                                                                                            |
| Burundi                          | 2005 | 2     | 364,732         | Direction Provinciale de l'Agriculture et de l'Élevage, Burundi (DPEA): Monographies des les Communes 2006 (GLIMS data warehouse)                                                                                                                                                   |
| Cameroon                         | 2007 | 1     | 1,253,931       | CountrySTAT - Food and agriculture data network (GLIMS data warehouse)                                                                                                                                                                                                              |
| Cape Verde                       | 2004 | 2     | 22,306          | Directorate of livestock, Cape Verde: Recenseamento Geral da Agricultura, 2004 (GLIMS data warehouse)                                                                                                                                                                               |
| Central African Republic         | 1990 | 1     | 2,501,269       | Environmental Research Group Oxford, ERGO: FAO, 2004. Agro-ecological distributions for Africa (Data CD) (GLIMS data warehouse)                                                                                                                                                     |
| Chad                             | 2007 | 1     | 7,688,188       | Direction de l'Élevage et des Ressources Animales: Effectifs du cheptel national par région administrative 2007 (GLIMS data warehouse)                                                                                                                                              |
| Comoros                          | 2004 | 1     | 37,200          | FAO animal production and health division: Rapport National Sur l'Etat des Ressources Génétiques Animales (GLIMS data warehouse)                                                                                                                                                    |
| Congo                            | 1996 | 1     | 72,100          | Centre National de la Statistique et des Études Économiques, Congo: Estimations des comptes nationaux de 1997-2000 (GLIMS data warehouse)                                                                                                                                           |
| Côte d'Ivoire                    | 2001 | 1     | 1,135,196       | Ministère de l'Agriculture et des Ressources Animales, Direction de la Programmation, Côte d'Ivoire: Recensement National de l'Agriculture 2001 (GLIMS data warehouse)                                                                                                              |
| Democratic Republic of the Congo | 2004 | 1     | 2,899           | Centre for Ticks and Tick-Borne Diseases: Preliminary census data from SADC and Eastern Africa (GLIMS data warehouse)                                                                                                                                                               |
| Djibouti                         | 1998 | 1     | 297,001         | Ministry of Agriculture of Djibouti through IGAD secretariat staff, data for 1998 (GLIMS data warehouse)                                                                                                                                                                            |
| Egypt                            | 2011 | 1     | 4,779,743       | Central Agency for Public Mobilization and Statistics, Egypt: Estimated numbers of livestock and animals by Governorate 2011 (GLIMS data warehouse)                                                                                                                                 |

|                   |      |   |            |                                                                                                                                                                                                                                                                                           |
|-------------------|------|---|------------|-------------------------------------------------------------------------------------------------------------------------------------------------------------------------------------------------------------------------------------------------------------------------------------------|
| Equatorial Guinea | 1985 | 6 | 320        | International Programme for the Development of the Meat Sector and International Programme for Coordinating the Development of the Dairy Sector. Republic of Equatorial Guinea, Draft Report, FAO, Rome, Italy.                                                                           |
| Eritrea           | 2002 | 2 | 1,927,137  | Environmental Research Group Oxford, ERGO: GIEWS special reports. Online data: <a href="http://www.fao.org/docrep/005/y7678e/y7678e00.htm">http://www.fao.org/docrep/005/y7678e/y7678e00.htm</a>                                                                                          |
| Ethiopia          | 2002 | 3 | 45,758,978 | Central Statistical Authority of Ethiopia: Agricultural Census 2001-2002 (GLIMS data warehouse)                                                                                                                                                                                           |
| Gabon             | 1998 | 1 | 18,321     | Environmental Research Group Oxford, ERGO: Agro-ecological distributions for Africa (GLIMS data warehouse)                                                                                                                                                                                |
| Gambia            | 2001 | 2 | 323,167    | Agricultural Statistics and Resources Economics Unit (ASRE), Government of the Gambia: Report of the Agricultural Census of The Gambia 2001/2002 Volume 1 and Volume 2 (GLIMS data warehouse)                                                                                             |
| Ghana             | 1996 | 1 | 1,247,861  | Veterinary Services of Ghana: Livestock Census, 1994-1996 (GLIMS data warehouse)                                                                                                                                                                                                          |
| Guinea            | 2011 | 1 | 5,234,783  | Réseau des Systèmes d'Information des Marchés en Afrique de l'Ouest: Stats cheptel. Online data: <a href="http://www.resimao.org/html/fr/Guinee/stats#cheptel">http://www.resimao.org/html/fr/Guinee/stats#cheptel</a>                                                                    |
| Guinea-Bissau     | 2009 | 1 | 1,121,555  | Ministère de l'Agriculture et du Développement Rural, Guinée-Bissau: Synthèse des résultats du Recensement National de l'Élevage en Guinée-Bissau, 2009 (GLIMS data warehouse)                                                                                                            |
| Kenya             | 2005 | 3 | 10,714,381 | Ministry of Livestock Development, Kenya: Compilation of divisional data 2005 (GLIMS data warehouse)                                                                                                                                                                                      |
| Lesotho           | 2010 | 1 | 626,344    | Bureau of Statistics of Lesotho: 2009/10 Lesotho Agricultural Census, Livestock Report (GLIMS data warehouse)                                                                                                                                                                             |
| Liberia           | 1983 | 1 | 12,598     | Ministry of Agriculture Regional Livestock Officers, Liberia: Estimates On Livestock Population in Liberia (GLIMS data warehouse)                                                                                                                                                         |
| Madagascar        | 2005 | 3 | 9,500,138  | Ministère de l'Agriculture, Secrétariat General, Direction de la Prévision et des Etudes Economiques, Madagascar: Recensement de l'agriculture (RA) - Campagne agricole 2004-2005 (GLIMS data warehouse)                                                                                  |
| Malawi            | 2007 | 2 | 884,132    | Agriculture Statistics Division of the National Statistical Office of Malawi (NSO): National Census of Agriculture and Livestock (October 2006 - October 2007) (GLIMS data warehouse)                                                                                                     |
| Mali              | 2011 | 1 | 9,438,181  | CountrySTAT - Food and agriculture data network: Élevage - Total des effectifs d'animaux vivants. Online data: <a href="http://www.countrystat.org/home.aspx?c=MLI&amp;tr=21">http://www.countrystat.org/home.aspx?c=MLI&amp;tr=21</a>                                                    |
| Mauritania        | 2007 | 1 | 795,500    | Office of National Statistics: Monographies Des Régions (GLIMS data warehouse)                                                                                                                                                                                                            |
| Mauritius         | 2011 | 1 | 5,365      | Central Statistic Office of Mauritius: Digest of Agricultural Statistics 2011 (GLIMS data warehouse)                                                                                                                                                                                      |
| Mayotte           | 2010 | 1 | 17,150     | Agreste la Statistique Agricole, Le Ministère de l'Agriculture, de l'Alimentation, de la Pêche et de la Ruralité, France: Recensement Agricole 2010. Online data: <a href="http://agriculture.gouv.fr/recensement-agricole-2010">http://agriculture.gouv.fr/recensement-agricole-2010</a> |
| Morocco           | 2008 | 2 | 2,651,200  | Ministry of Agriculture, Rural Development and Sea Fisheries: Maroc Régions 2008 (GLIMS data warehouse)                                                                                                                                                                                   |
| Mozambique        | 2002 | 2 | 590,363    | Direccao Nacional De Pecuaria, Mozambique: Annual Reports, 2003 (GLIMS data warehouse)                                                                                                                                                                                                    |
| Namibia           | 2006 | 1 | 2,388,780  | FAO Special Report, FAO/WFP Crop, Livestock and Food Security Assessment Mission to Namibia (GLIMS data warehouse)                                                                                                                                                                        |
| Niger             | 2005 | 2 | 7,336,087  | Ministère des Ressources Animales, Niger: Recensement Général de l'Agriculture et du Cheptel. Volume II. Résultats Définitifs (Volet cheptel). Juin 2007. (Projet GCP/NER/041/EC). (GLIMS data warehouse)                                                                                 |
| Nigeria           | 2007 | 1 | 25,019,700 | National Bureau of Statistics, Nigeria: Agricultural Census 2007 (GLIMS data warehouse)                                                                                                                                                                                                   |

|                             |      |   |            |                                                                                                                                                                                                                                                                                           |
|-----------------------------|------|---|------------|-------------------------------------------------------------------------------------------------------------------------------------------------------------------------------------------------------------------------------------------------------------------------------------------|
| Rwanda                      | 2008 | 2 | 1,548,970  | National Institute of Statistics of Rwanda: National Agricultural Survey 2008 (Final report) (GLIMS data warehouse)                                                                                                                                                                       |
| Réunion                     | 2010 | 2 | 16,316     | Agreste la Statistique Agricole, Le Ministère de l'Agriculture, de l'Alimentation, de la Pêche et de la Ruralité, France: Recensement Agricole 2010. Online data: <a href="http://agriculture.gouv.fr/recensement-agricole-2010">http://agriculture.gouv.fr/recensement-agricole-2010</a> |
| Saint Helena                | 2009 | 1 | 598        | Agriculture and Natural Resources Department of St. Helena: Livestock Census 2009 (GLIMS data warehouse)                                                                                                                                                                                  |
| Senegal                     | 2009 | 2 | 3,260,867  | Agence Nationale de la Statistique et de la Démographie du Sénégal: Live Data Base (LDB). Online data: <a href="http://www.ansd.sn/publications_SES_region.html">http://www.ansd.sn/publications_SES_region.html</a>                                                                      |
| Sierra Leone                | 2004 | 2 | 98,632     | Ministry of Agriculture & Food Security of Sierra Leone: 2004 Populations and Housing census Statistical Office (GLIMS data warehouse)                                                                                                                                                    |
| Somalia                     | 1996 | 6 | 4,409,430  | Food Security Assessment Unit (FSAU) in 1999: Livestock Populations in Various Zones of Somalia (FSAU data) (GLIMS data warehouse)                                                                                                                                                        |
| South Africa                | 2011 | 1 | 13,871,000 | Ministry of Agriculture, Forestry and Fisheries of South Africa: Trends in the Agricultural Sector, 2011 (GLIMS data warehouse)                                                                                                                                                           |
| Sudan                       | 2009 | 1 | 41,563,002 | Ministry of Animal Resources and fisheries, Sudan: Statistical Year Book for the Year 2009 (GLIMS data warehouse)                                                                                                                                                                         |
| Swaziland                   | 2010 | 1 | 619,753    | Directorate of Veterinary and Livestock Services: Swaziland Livestock Statistics, Census 2010 (GLIMS data warehouse)                                                                                                                                                                      |
| Togo                        | 1995 | 1 | 201,078    | Data from Dr. Guy Hendrickx: Round Survey, 1995 (GLIMS data warehouse)                                                                                                                                                                                                                    |
| Tunisia                     | 2010 | 1 | 670,980    | Ministère de l'Agriculture de l'Environnement et des Ressources Hydrauliques, Tunisia: Annuaire Statistique 2010 (GLIMS data warehouse)                                                                                                                                                   |
| Uganda                      | 2008 | 4 | 10,016,659 | Uganda Bureau of Statistics: Uganda census 2008 - Data acquired from Dr. W.Wint (GLIMS data warehouse)                                                                                                                                                                                    |
| United Republic of Tanzania | 2009 | 2 | 18,713,654 | CountrySTAT - Food and agriculture data network (GLIMS data warehouse)                                                                                                                                                                                                                    |
| Western Sahara              | 2009 | 1 | 1,300      | Direction de la Statistique du Maroc: Annuaire Statistiques des Régions (GLIMS data warehouse)                                                                                                                                                                                            |
| Zambia                      | 2009 | 1 | 3,445,630  | Department of Research and Specialist Services, Zambia: National Livestock Census by Province 1994 to 2009 (GLIMS data warehouse)                                                                                                                                                         |
| Zimbabwe                    | 2008 | 2 | 5,106,673  | Department of Livestock and Veterinary Services: Livestock Census Summary (GLIMS data warehouse)                                                                                                                                                                                          |

---

No Data for: Bassas da India, British Indian Ocean Territory, Europa Island, Glorioso Island, Juan de Nova Island, Libya, Sao Tome and Principe, Seychelles, Tromelin Island

## Asia Tile

| COUNTRY                   | YEAR | LEVEL | Totals in GLIMS | SOURCE                                                                                                                                                                                                                                                                                                                                                                                  |
|---------------------------|------|-------|-----------------|-----------------------------------------------------------------------------------------------------------------------------------------------------------------------------------------------------------------------------------------------------------------------------------------------------------------------------------------------------------------------------------------|
| Afghanistan               | 2003 | 2     | 3,706,186       | Ministry of Agriculture, Irrigation and Livestock of Afghanistan: Afghanistan - National Livestock Census 2002-2003 - Final Report. Online data:<br><a href="http://reliefweb.int/sites/reliefweb.int/files/resources/58C374339FC582F149256DF30009D60F-fao-afg-4dec.pdf">http://reliefweb.int/sites/reliefweb.int/files/resources/58C374339FC582F149256DF30009D60F-fao-afg-4dec.pdf</a> |
| Armenia                   | 2012 | 1     | 599,243         | National statistical service of the republic of Armenia: Livestock Census, 2012. Online data:<br><a href="http://www.armstat.am/file/article/anas_2012.pdf">http://www.armstat.am/file/article/anas_2012.pdf</a>                                                                                                                                                                        |
| Azerbaijan                | 2011 | 1     | 2,412,305       | The State Statistical Committee of the Republic of Azerbaijan: The data on regions. Online data:<br><a href="http://www.stat.gov.az/source/agriculture/indexen.php">http://www.stat.gov.az/source/agriculture/indexen.php</a>                                                                                                                                                           |
| Bangladesh                | 2008 | 3     | 28,423,749      | Bangladesh Bureau of Statistics: Agriculture Census Report 2008. Online data:<br><a href="http://www.bbs.gov.bd/PageWebMenuContent.aspx?MenuKey=224">http://www.bbs.gov.bd/PageWebMenuContent.aspx?MenuKey=224</a>                                                                                                                                                                      |
| Belarus                   | 2011 | 2     | 3,930,200       | National Statistical Committee of the Republic of Belarus: Agriculture of the Republic of Belarus, 2011 (GLIMS data warehouse)                                                                                                                                                                                                                                                          |
| Bhutan                    | 2009 | 2     | 303,018         | Ministry of agriculture and forest, Royal government of Bhutan: Dzongkhag livestock sector (GLIMS data warehouse)                                                                                                                                                                                                                                                                       |
| Bulgaria                  | 2010 | 2     | 572,710         | Ministry of Agriculture and Forestry - Agrostistics Directorate, Bulgaria: Agricultural Census 2010. Online data:<br><a href="http://www.mzh.government.bg/MZH/ShortLinks/SelskaPolitika/Agrostistics/Structure_agricultural_holdings/Results.aspx">http://www.mzh.government.bg/MZH/ShortLinks/SelskaPolitika/Agrostistics/Structure_agricultural_holdings/Results.aspx</a>            |
| Cambodia                  | 2011 | 2     | 3,339,623       | Ministry of Agriculture, Forestry and Fisheries: Cambodia Livestock Census 2011 (GLIMS data warehouse)                                                                                                                                                                                                                                                                                  |
| China                     | 2001 | 3     | 135,686,083     | China Agricultural Press, 2002. For Taiwan: Statistics Office, COA, Executive Yuan, Taiwan Statistical Yearbook, 2010 (GLIMS data warehouse)                                                                                                                                                                                                                                            |
| Cyprus                    | 2003 | 1     | 61,053          | Statistical Service of Cyprus: Census of Agriculture, 2003. Online data:<br><a href="http://www.mof.gov.cy/mof/cystat/statistics.nsf/All/DE20AEA98C4DD6EEC22577A50041F0B8/\$file/Census_of_Agriculture-2003.pdf?OpenElement">http://www.mof.gov.cy/mof/cystat/statistics.nsf/All/DE20AEA98C4DD6EEC22577A50041F0B8/\$file/Census_of_Agriculture-2003.pdf?OpenElement</a>                 |
| Georgia                   | 2004 | 2     | 1,157,781       | National Statistics Office of Georgia: First National Agricultural Census 2004 in Georgia. Online data:<br><a href="http://geostat.ge/cms/site_images/files/english/agriculture/census/section7.pdf">http://geostat.ge/cms/site_images/files/english/agriculture/census/section7.pdf</a>                                                                                                |
| India                     | 2007 | 2     | 186,515,966     | Department of Animal Husbandry, Dairying & Fisheries, Ministry of Agriculture, India: Census of Agriculture, 2007 (GLIMS data warehouse)                                                                                                                                                                                                                                                |
| Indonesia                 | 2008 | 1     | 12,714,181      | Department Pertanian Republik Indonesia: Buku Statistik, 2009 (GLIMS data warehouse)                                                                                                                                                                                                                                                                                                    |
| Iran, Islamic Republic of | 2005 | 1     | 7,609,359       | Statistical Centre of Iran: Iran Statistical Yearbook 1385 (2005) (GLIMS data warehouse)                                                                                                                                                                                                                                                                                                |

|                                  |      |   |            |                                                                                                                                                                                                                                                                                                                                                                                       |
|----------------------------------|------|---|------------|---------------------------------------------------------------------------------------------------------------------------------------------------------------------------------------------------------------------------------------------------------------------------------------------------------------------------------------------------------------------------------------|
| Iraq                             | 2000 | 1 | 511,644    | FAO, 2003. Investment Centre Division Asia and Pacific - Service emergency operation and rehabilitation division - Special emergency programme service data for the three northern governorates. Iraq - SCR 986-three-year agricultural programme in the Iraqi Northern (GLIMS data warehouse)                                                                                        |
| Israel                           | 2002 | 1 | 177,194    | Central Bureau of Statistics, Agriculture Division: Annual tables from publication: agriculture in Israel 2001-2003. Online data: <a href="http://www.cbs.gov.il/haklaut/agrical_2003/haklaut2003_e.pdf">http://www.cbs.gov.il/haklaut/agrical_2003/haklaut2003_e.pdf</a>                                                                                                             |
| Japan                            | 2011 | 1 | 4,230,570  | Statistics Department, Minister's Secretariat, Ministry of Agriculture, Forestry and Fisheries: The 87th Statistical Yearbook of Ministry of Agriculture Forestry and Fisheries, Japan 2011-2012. Online data: <a href="http://www.maff.go.jp/e/tokei/kikaku/nenji_e/87nenji/index.html">http://www.maff.go.jp/e/tokei/kikaku/nenji_e/87nenji/index.html</a>                          |
| Jordan                           | 2007 | 2 | 88,215     | Department of Statistics, Jordan: The Agricultural Census 2007 (GLIMS data warehouse)                                                                                                                                                                                                                                                                                                 |
| Kazakhstan                       | 2012 | 1 | 5,690,000  | Agency on Statistics of the Republic of Kazakhstan: Basic indicators for 2003-2012. Online data: <a href="http://www.eng.stat.kz/digital/Agriculture/Pages/default.aspx">http://www.eng.stat.kz/digital/Agriculture/Pages/default.aspx</a>                                                                                                                                            |
| Kuwait                           | 2009 | 1 | 35,705     | Central Statistical Bureau, State of Kuwait: Annual Agricultural Statistics 2009-2010. Online data: <a href="http://www.csb.gov.kw/Socan_Statistic_EN.aspx?ID=42">http://www.csb.gov.kw/Socan_Statistic_EN.aspx?ID=42</a>                                                                                                                                                             |
| Kyrgyzstan                       | 2012 | 1 | 1,357,015  | National Statistic Committee of Kyrgyzstan (GLIMS data warehouse)                                                                                                                                                                                                                                                                                                                     |
| Lao People's Democratic Republic | 2011 | 2 | 1,583,334  | Department of Livestock and Fisheries, Laos: Lao Livestock Census Data 2011/12 in: PDR Farm Animal Distributions, 2011: Comparative Maps of Agricultural Census and Administrative Returns (GLIMS data warehouse)                                                                                                                                                                     |
| Lebanon                          | 1997 | 2 | 56,626     | United Nations, Economic and Social Commission for Western Asia, 1999: National farm data handbook for Lebanon. New York (GLIMS data warehouse)                                                                                                                                                                                                                                       |
| Malaysia                         | 2011 | 1 | 768,403    | Department of Veterinary Service, Malaysia: Selected Agricultural Indicators 2012 (Indikator Pertanian Terpilih 2012). Online data: <a href="http://www.statistics.gov.my/portal/download_Agriculture/files/Selected_Agricultural_Indicators_Malaysia_2012.pdf">http://www.statistics.gov.my/portal/download_Agriculture/files/Selected_Agricultural_Indicators_Malaysia_2012.pdf</a> |
| Mongolia                         | 2012 | 2 | 2,583,027  | National Statistical Office of Mongolia (MONSIS): Number of livestock by type, by regions, soums, aimags and the Capital. Online data: <a href="http://www.1212.mn/en/contents/stats/contents_stat_fld_tree_html.jsp">http://www.1212.mn/en/contents/stats/contents_stat_fld_tree_html.jsp</a>                                                                                        |
| Myanmar                          | 2011 | 3 | 13,981,114 | Livestock Breeding and Veterinary Department (LBVD), Ministry of Livestock Breeding and Fisheries, Yangon, Myanmar: Myanmar Farm Animal Resources: Numbers and Distributions from Administrative Returns, 2011/12 (GLIMS data warehouse)                                                                                                                                              |
| Nepal                            | 2009 | 3 | 7,106,976  | Ministry of Agriculture and Cooperatives (MOAC), Nepal: 2009 data (GLIMS data warehouse)                                                                                                                                                                                                                                                                                              |
| Pakistan                         | 2010 | 2 | 24,114,455 | Agricultural Census Organization, Ministry of Food & Agriculture, Pakistan: Agricultural Census 2010. Online data: <a href="http://www.pbs.gov.pk/content/agricultural-census-2010-pakistan-report">http://www.pbs.gov.pk/content/agricultural-census-2010-pakistan-report</a>                                                                                                        |
| Philippines                      | 2010 | 3 | 2,599,466  | Bureau of Agricultural Statistics (BAS): Livestock Survey Philippines 2010 (GLIMS data warehouse)                                                                                                                                                                                                                                                                                     |
| Qatar                            | 2001 | 1 | 9,671      | Ministry of Municipal Affairs and Agriculture Department of Agriculture and Water Research: Agricultural Census 2000-2001 (GLIMS data warehouse)                                                                                                                                                                                                                                      |

|                      |      |   |            |                                                                                                                                                                                                                                                                                                                                                                     |
|----------------------|------|---|------------|---------------------------------------------------------------------------------------------------------------------------------------------------------------------------------------------------------------------------------------------------------------------------------------------------------------------------------------------------------------------|
| Republic of Korea    | 2011 | 1 | 3,353,353  | Korea National Statistical Office: Korea Statistical Yearbook, 2012 (GLIMS data warehouse)                                                                                                                                                                                                                                                                          |
| Republic of Moldova  | 2011 | 2 | 209,900    | Statistica Moldovei: Statistical Yearbook of the Republic of Moldova 2011. Online data: <a href="http://www.statistica.md/pageview.php?l=en&amp;idc=263&amp;id=2193">http://www.statistica.md/pageview.php?l=en&amp;idc=263&amp;id=2193</a>                                                                                                                         |
| Romania              | 2011 | 1 | 1,988,939  | National Institute of Statistics, Romania: Tempo online database/Agriculture/Livestock and Animal Production 2000-2011. Online data: <a href="https://statistici.insse.ro/shop/?lang=en">https://statistici.insse.ro/shop/?lang=en</a>                                                                                                                              |
| Russian Federation   | 2012 | 1 | 21,446,360 | Russian Federation - Federal State Statistical Service: Livestock and poultry production, 2011 and 2012. Online data: <a href="http://www.fedstat.ru/indicators/start.do">http://www.fedstat.ru/indicators/start.do</a>                                                                                                                                             |
| Saudi Arabia         | 2009 | 1 | 424,489    | Central Department of Statistics and Information of Kingdom of Saudi Arabia: Statistical Yearbook, 2010 Saudi Arabia (GLIMS data warehouse)                                                                                                                                                                                                                         |
| Sri Lanka            | 2012 | 2 | 1,235,535  | Agriculture and Environment Statistics Division, Department of Census and Statistics, Sri Lanka: Livestock Population by Type and by District 2003 - 2012. Online data: <a href="http://www.statistics.gov.lk/agriculture/Livestock/LivestockPopulationSubnational.html">http://www.statistics.gov.lk/agriculture/Livestock/LivestockPopulationSubnational.html</a> |
| Syrian Arab Republic | 2004 | 1 | 1,024,120  | National Agricultural Policy Center - The Ministry of Agriculture and Agrarian Reform: Syrian agricultural database (SAD) (GLIMS data warehouse)                                                                                                                                                                                                                    |
| Tajikistan           | 2009 | 2 | 1,834,727  | Agency for Statistics, Tajikistan Republic: Regions of Tajikistan Republic, 2010 (GLIMS data warehouse)                                                                                                                                                                                                                                                             |
| Thailand             | 2006 | 1 | 6,003,883  | Regional Data Exchange System on Food and Agricultural Statistics in Asia and Pacific Countries: Thailand sub national Statistics. Online data: <a href="http://www.faorap-apcas.org/thailand.html">http://www.faorap-apcas.org/thailand.html</a>                                                                                                                   |
| Turkey               | 2009 | 2 | 10,723,958 | Turkish Statistical Institute: Livestock statistics database 2009 (GLIMS data warehouse)                                                                                                                                                                                                                                                                            |
| Ukraine              | 2012 | 1 | 4,645,900  | State statistics committee Ukraine: Head of livestock and poultry by regions (GLIMS data warehouse)                                                                                                                                                                                                                                                                 |
| United Arab Emirates | 2000 | 1 | 96,050     | Ministry of Agriculture and Fisheries: Agricultural Statistical Yearbook 2000. United Arab Emirates (GLIMS data warehouse)                                                                                                                                                                                                                                          |
| Uzbekistan           | 2002 | 1 | 5,416,100  | State Statistics Department of Uzbekistan: Agriculture of Uzbekistan, 2001. Minmakroekonomstat of Republic Uzbekistan, State Statistics Department of Uzbekistan Tashkent, 2002 (GLIMS data warehouse)                                                                                                                                                              |
| Viet Nam             | 2001 | 6 | 3,710,385  | General Statistics Office of Vietnam: Agricultural Census database 2001. Online data: <a href="http://www.gso.gov.vn/default_en.aspx?tabid=477&amp;idmid=4&amp;ItemID=1824">http://www.gso.gov.vn/default_en.aspx?tabid=477&amp;idmid=4&amp;ItemID=1824</a>                                                                                                         |
| Yemen                | 2007 | 1 | 1,394,707  | Directorate of Agricultural Statistics and Documentation, Ministry of Agriculture and Irrigation, Yemen (GLIMS data warehouse)                                                                                                                                                                                                                                      |

---

No Data for: Bahrain, Brunei Darussalam, Christmas Island, Cocos (Keeling) Islands, Democratic People's Republic of Korea, Kuril Islands, Liancourt Rock, Maldives, Oman, Paracel Islands, Scarborough Reef, Singapore, Senkaku Islands, Spratly Islands, Timor-Leste, Turkmenistan

## Europe Tile

| COUNTRY        | YEAR | LEVEL | Totals in GLIMS | SOURCE                                                                                                                                                                                                                                                                                                                                                              |
|----------------|------|-------|-----------------|---------------------------------------------------------------------------------------------------------------------------------------------------------------------------------------------------------------------------------------------------------------------------------------------------------------------------------------------------------------------|
| Albania        | 2010 | 1     | 493,000         | Institute of Statics, Albania: Agricultural sector, Livestock 2001-2010 (GLIMS data warehouse)                                                                                                                                                                                                                                                                      |
| Andorra        | 2010 | 1     | 1,565           | Ministry of Economy and Territory - Department of Agriculture, Andorra: Agriculture, Herding, Hunting and Fishing - Livestock by type and parish 2003-2010 (GLIMS data warehouse)                                                                                                                                                                                   |
| Austria        | 2010 | 1     | 2,013,281       | Statistics Austria: Livestock Survey, 2010 (GLIMS data warehouse)                                                                                                                                                                                                                                                                                                   |
| Belgium        | 2010 | 3     | 1,878,963       | Directorate - General Statistics Belgium formerly known as NIS-INS: Data 2010 from William Wint, (all acquired by Els Ducheyne at Avia_GIS, Zoersel, Belgium, process by William Wint, ERGO Ltd) (GLIMS data warehouse)                                                                                                                                             |
| Croatia        | 2003 | 1     | 398,037         | Central Bureau of Statistics, Republic of Croatia: Agricultural Census 2003. Online data: <a href="http://www.dzs.hr/default_e.htm">http://www.dzs.hr/default_e.htm</a>                                                                                                                                                                                             |
| Czech Republic | 2010 | 2     | 1,328,008       | Czech Statistical Office: Agrocensus regions: Farm Structure Survey and Survey on Agricultural Production Methods 2010. Online data: <a href="http://www.czso.cz/csu/2012edicniplan.nsf/engp/2127-12">http://www.czso.cz/csu/2012edicniplan.nsf/engp/2127-12</a>                                                                                                    |
| Denmark        | 2010 | 2     | 1,571,050       | Denmark Statistics: Farms by region and selected farms, crops and livestock. Online data: <a href="http://www.statistikbanken.dk/statbank5a/SelectVarVal/Define.asp?Maintable=BDF51&amp;PLanguage=1">http://www.statistikbanken.dk/statbank5a/SelectVarVal/Define.asp?Maintable=BDF51&amp;PLanguage=1</a>                                                           |
| Estonia        | 2001 | 2     | 280,731         | Statistikaamet Statistical Office of Estonia: Agricultural Census 2001. Online data: <a href="http://www.stat.ee/agricultural-census-2001">http://www.stat.ee/agricultural-census-2001</a>                                                                                                                                                                          |
| Finland        | 2010 | 6     | 925,800         | The Information Centre of the Ministry of Agriculture and Forestry, Finland: Yearbook of Farm Statistics 2011 (GLIMS data warehouse)                                                                                                                                                                                                                                |
| France         | 2009 | 2     | 19,692,468      | Service de la Statistique et de la Prospective (SSP): Statistique Agricole Annuelle (GLIMS data warehouse)                                                                                                                                                                                                                                                          |
| Germany        | 2007 | 2     | 12,351,818      | Federal Statistical Office, Germany: GENESIS database. Online data: <a href="https://www.regionalstatistik.de/genesis/online/online.jsessionid=EE45147898822814978BE734145275C4?operation=sprachwechsel&amp;option=en">https://www.regionalstatistik.de/genesis/online/online.jsessionid=EE45147898822814978BE734145275C4?operation=sprachwechsel&amp;option=en</a> |
| Greece         | 2007 | 2     | 731,996         | Hellenic Statistic Authority (EL.STAT): Farms and number of animals by type, region and county (GLIMS data warehouse)                                                                                                                                                                                                                                               |
| Hungary        | 2010 | 1     | 684,000         | Hungarian Central Statistical Office: Regional Statistics. Online data: <a href="http://www.ksh.hu/agriculture">http://www.ksh.hu/agriculture</a>                                                                                                                                                                                                                   |
| Iceland        | 2010 | 2     | 73,781          | Statistics Iceland: 2010 data (GLIMS data warehouse)                                                                                                                                                                                                                                                                                                                |
| Ireland        | 2000 | 6     | 6,851,919       | Central Statistical Office Ireland: Census of Agriculture 2000 (data acquired by Els Ducheyne at Avia_GIS, Zoersel, Belgium, process by William Wint, ERGO Ltd) (GLIMS data warehouse) (GLIMS data warehouse)                                                                                                                                                       |
| Italy          | 2010 | 3     | 5,587,719       | Istituto Nazionale di Statistica: Censimento Agricoltura 2010. Online data: <a href="http://dati-censimentoagricoltura.istat.it">http://dati-censimentoagricoltura.istat.it</a>                                                                                                                                                                                     |

|                                           |      |   |           |                                                                                                                                                                                                                                                                                          |
|-------------------------------------------|------|---|-----------|------------------------------------------------------------------------------------------------------------------------------------------------------------------------------------------------------------------------------------------------------------------------------------------|
| Latvia                                    | 2001 | 1 | 364,807   | Central Statistical Bureau of Latvia: Results of 2001 Agricultural Census. Online data:<br><a href="http://www.csb.gov.lv/en/dati/agricultural-census-2001-30765.html">http://www.csb.gov.lv/en/dati/agricultural-census-2001-30765.html</a>                                             |
| Liechtenstein                             | 2009 | 1 | 6,078     | Amt für Statistik Liechtenstein: Landwirtschaftsstatistik 2009 (GLIMS data warehouse)                                                                                                                                                                                                    |
| Lithuania                                 | 2010 | 2 | 780,051   | Lietuvos Statistikos Departamenta: Number of livestock by administrative territory, 2011 (GLIMS data warehouse)                                                                                                                                                                          |
| Luxembourg                                | 2008 | 2 | 196,295   | Portail des statistiques du Grand-Duché de Luxembourg (STATEC): Recensement Agricole, 2008 (GLIMS data warehouse)                                                                                                                                                                        |
| Malta                                     | 2010 | 6 | 15,688    | National Statistics Office of Malta: Census of Agriculture 2010. Online data:<br><a href="http://www.nso.gov.mt/statdoc/document_view.aspx?id=3287&amp;backurl=/themes/theme_page.aspx">http://www.nso.gov.mt/statdoc/document_view.aspx?id=3287&amp;backurl=/themes/theme_page.aspx</a> |
| Montenegro                                | 2010 | 1 | 78,633    | Statistical office of Montenegro (MONSTAT): Agriculture Census 2010. Online data:<br><a href="http://www.monstat.org/eng/page.php?id=58&amp;pageid=58">http://www.monstat.org/eng/page.php?id=58&amp;pageid=58</a>                                                                       |
| Netherlands                               | 2010 | 2 | 3,975,194 | Centraal Bureau voor de Statistiek, Netherlands: Agriculture: crops, livestock and land use by general far type, region - 2011 (GLIMS data warehouse)                                                                                                                                    |
| Norway                                    | 2010 | 1 | 867,641   | Statistics Norway: Agriculture Statistics 2011 (GLIMS data warehouse)                                                                                                                                                                                                                    |
| Poland                                    | 2009 | 1 | 5,700,000 | Central Statistical Office, Poland: Statistical Yearbook of Agriculture 2010 (GLIMS data warehouse)                                                                                                                                                                                      |
| Portugal                                  | 2009 | 2 | 1,173,975 | Instituto Nacional de Estatística - Statistics Portugal: Agricultural Census 2009. Online data:<br><a href="http://ra09.ine.pt/xportal/xmain?xpid=RA2009&amp;xpgid=ra_home">http://ra09.ine.pt/xportal/xmain?xpid=RA2009&amp;xpgid=ra_home</a>                                           |
| Serbia                                    | 2006 | 1 | 1,105,988 | Statistical Office of Serbia: Municipalities of Serbia 2007 (GLIMS data warehouse)                                                                                                                                                                                                       |
| Slovakia                                  | 2009 | 2 | 471,965   | Statistical Office of the Slovak Republic: Livestock by territory, products and period. Online data:<br><a href="http://px-web.statistics.sk/PXWebSlovak/DATABASE/En/databasetree.asp">http://px-web.statistics.sk/PXWebSlovak/DATABASE/En/databasetree.asp</a>                          |
| Slovenia                                  | 2010 | 2 | 471,584   | Statistical Office of the Republic of Slovenia: Agricultural Census Slovenia 2010. Online data:<br><a href="http://www.stat.si/eng/novica_prikazi.aspx?id=4594">http://www.stat.si/eng/novica_prikazi.aspx?id=4594</a>                                                                   |
| Spain                                     | 2010 | 2 | 6,075,081 | Ministerio de Medio Ambiente y Medio Rural y Marino, Gobierno de España (MARM): Encuestas Ganaderas 2010 (GLIMS data warehouse)                                                                                                                                                          |
| Sweden                                    | 2009 | 1 | 1,538,281 | Statistics Sweden: Yearbook of Agricultural Statistics 2010 (GLIMS data warehouse)                                                                                                                                                                                                       |
| Switzerland                               | 2009 | 1 | 1,597,484 | Swiss Federal Statistical Office: Recensement des entreprises agricoles,1999-2009 (GLIMS data warehouse)                                                                                                                                                                                 |
| The former Yugoslav Republic of Macedonia | 2006 | 2 | 232,526   | State Statistic Office of the Republic of Macedonia: Census of Agriculture 2007. Online data:<br><a href="http://www.stat.gov.mk/PrikaziPublikacija_en.aspx?id=51&amp;rbr=205">http://www.stat.gov.mk/PrikaziPublikacija_en.aspx?id=51&amp;rbr=205</a>                                   |
| United Kingdom                            | 2009 | 2 | 9,991,910 | Office for National Statistics, U.K.: Statistics by Region. Online data:<br><a href="http://www.statistics.gov.uk/hub/regional-statistics/">http://www.statistics.gov.uk/hub/regional-statistics/</a>                                                                                    |

No Data for: Bosnia and Herzegovina, Faroe Islands, Gibraltar, Guernsey, Holy See, Isle of Man, Jersey, Madeira Islands, Monaco, San Marino, Svalbard and Jan Mayen Islands



## North America Tile

| COUNTRY            | YEAR | LEVEL | Totals in GLIMS | SOURCE                                                                                                                                                                                                                                                                                                                                                              |
|--------------------|------|-------|-----------------|---------------------------------------------------------------------------------------------------------------------------------------------------------------------------------------------------------------------------------------------------------------------------------------------------------------------------------------------------------------------|
| Belize             | 2003 | 1     | 57,800          | Ministry Of Agriculture, Fisheries and Cooperatives, Belize: Annual Report 2003. Online data: <a href="http://www.agriculture.gov.bz/PDF/Annual_Report_2003.pdf">http://www.agriculture.gov.bz/PDF/Annual_Report_2003.pdf</a>                                                                                                                                       |
| Canada             | 2006 | 2     | 15,772,904      | Statistics Canada: 2006 Census of Agriculture. Online data: <a href="http://www.statcan.gc.ca/ca-ra2006/index-eng.htm">http://www.statcan.gc.ca/ca-ra2006/index-eng.htm</a>                                                                                                                                                                                         |
| Cayman Islands     | 2009 | 1     | 2,231           | Economics and Statistics Office - Government of the Cayman Islands: Statistical Compendium 2009 (GLIMS data warehouse)                                                                                                                                                                                                                                              |
| Costa Rica         | 2000 | 1     | 1,358,209       | Ministerio de Agricultura y Ganadería, Costa Rica: Censo Ganadero 2000 (GLIMS data warehouse)                                                                                                                                                                                                                                                                       |
| Cuba               | 2009 | 1     | 3,586,303       | Oficina Nacional de Estadísticas, República de Cuba: Anuario Estadístico de Cuba 2009 - Edición 2010 (GLIMS data warehouse)                                                                                                                                                                                                                                         |
| Dominican Republic | 1997 | 1     | 2,453,276       | Oficina Nacional de Estadística, Republica Dominicana: Republica Dominicana en cifras 1997 (GLIMS data warehouse)                                                                                                                                                                                                                                                   |
| El Salvador        | 2007 | 2     | 1,141,323       | Ministerio de Economía - El Salvador: IV Censo Agropecuario 2007-2008 (GLIMS data warehouse)                                                                                                                                                                                                                                                                        |
| Guadeloupe         | 2000 | 1     | 64,236          | Agreste la Statistique Agricole, Le Ministère de l'Agriculture, de l'Alimentation, de la Pêche et de la Ruralité, France: Recensement Agricole 2000. Online data: <a href="http://agreste.agriculture.gouv.fr/recensement-agricole-2010/resultats-donnees-chiffrees/">http://agreste.agriculture.gouv.fr/recensement-agricole-2010/resultats-donnees-chiffrees/</a> |
| Guatemala          | 2003 | 2     | 1,627,522       | Instituto Nacional de Estadística, Guatemala: IV Censo Nacional Agropecuario, 2003. Online data: <a href="http://www.ine.gob.gt/np/agropecuario/tomo%20IV.pdf">http://www.ine.gob.gt/np/agropecuario/tomo%20IV.pdf</a>                                                                                                                                              |
| Honduras           | 1993 | 1     | 2,077,460       | Secretaría de Planificación, Coordinación y Presupuesto, Honduras: IV Censo Nacional Agropecuario 1993 (GLIMS data warehouse)                                                                                                                                                                                                                                       |
| Jamaica            | 2009 | 1     | 113,338         | Agricultural Business Information System, Jamaica: Livestock Summary Report, 2009 (GLIMS data warehouse)                                                                                                                                                                                                                                                            |
| Martinique         | 2000 | 1     | 28,342          | Agreste la Statistique Agricole, Le Ministère de l'Agriculture, de l'Alimentation, de la Pêche et de la Ruralité, France: Recensement Agricole 2000. Online data: <a href="http://agreste.agriculture.gouv.fr/recensement-agricole-2010/resultats-donnees-chiffrees/">http://agreste.agriculture.gouv.fr/recensement-agricole-2010/resultats-donnees-chiffrees/</a> |
| Mexico             | 2007 | 2     | 23,237,877      | Instituto Nacional de Estadística Geografía e Informática, México: Censo Agrícola, Ganadero y Forestal 2007. Online data: <a href="http://www.inegi.org.mx/est/contenidos/proyectos/Agro/ca2007/Resultados_Agricola/default.aspx">http://www.inegi.org.mx/est/contenidos/proyectos/Agro/ca2007/Resultados_Agricola/default.aspx</a>                                 |
| Nicaragua          | 2001 | 2     | 2,657,039       | Instituto Nacional de Estadística y Censos, Nicaragua: III Censo Nacional Agropecuario, 2001 (GLIMS data warehouse)                                                                                                                                                                                                                                                 |

|                                  |      |   |            |                                                                                                                                                                                                                                                                                                                                                                                                          |
|----------------------------------|------|---|------------|----------------------------------------------------------------------------------------------------------------------------------------------------------------------------------------------------------------------------------------------------------------------------------------------------------------------------------------------------------------------------------------------------------|
| Panama                           | 2001 | 2 | 1,531,914  | Instituto Nacional de Estadística y Censo: Existencia de Animales en la República, por clase de animal, según provincia: 21 de abril de 1991 al 22 abril de 2001. Online data: <a href="http://www.contraloria.gob.pa/incc/Avance/Avance.aspx?ID_CATEGORIA=2&amp;ID_CIFRAS=8&amp;ID_IDIO_MA=1">http://www.contraloria.gob.pa/incc/Avance/Avance.aspx?ID_CATEGORIA=2&amp;ID_CIFRAS=8&amp;ID_IDIO_MA=1</a> |
| Puerto Rico                      | 2007 | 2 | 259,918    | National Agricultural Statistics Service - United States Department of Agriculture: National Agricultural Census 2007. Online data: <a href="http://www.agcensus.usda.gov/Publications/2007/Full_Report/">http://www.agcensus.usda.gov/Publications/2007/Full_Report/</a>                                                                                                                                |
| Saint Lucia                      | 2007 | 6 | 5,345      | Ministry of Agriculture, Forestry and Fisheries: Census of Agriculture - Final report 2007. Online data: <a href="http://www.govt.lc/www/publications/AgricultureCensus2007.pdf">http://www.govt.lc/www/publications/AgricultureCensus2007.pdf</a>                                                                                                                                                       |
| Saint Vincent and the Grenadines | 2000 | 1 | 4,767      | Ministry of Agriculture and Labour, Government of Saint Vincent and the Grenadines: National Agricultural Census 2000 (GLIMS data warehouse)                                                                                                                                                                                                                                                             |
| United States of America         | 2007 | 2 | 96,184,610 | National Agricultural Statistics Service - United States Department of Agriculture: National Agricultural Census 2007. Online data: <a href="http://www.agcensus.usda.gov/Publications/2007/Full_Report/">http://www.agcensus.usda.gov/Publications/2007/Full_Report/</a>                                                                                                                                |

---

No Data for: Anguilla, Antigua and Barbuda, Bahamas, Barbados, Bermuda, Bird Island, British Virgin Islands, Dominica, Grenada, Haiti, Montserrat, Netherlands Antilles, Saint Kitts and Nevis, Turks and Caicos Islands, United States Virgin Islands

## South America Tile

| COUNTRY                               | YEAR | LEVEL | Totals in GLIMS | SOURCE                                                                                                                                                                                                                                                                                                                                                                                                           |
|---------------------------------------|------|-------|-----------------|------------------------------------------------------------------------------------------------------------------------------------------------------------------------------------------------------------------------------------------------------------------------------------------------------------------------------------------------------------------------------------------------------------------|
| Argentina                             | 2009 | 2     | 53,637,537      | Instituto Nacional de Tecnología Agropecuaria, Argentina: Análisis de la actividad ganadera bovina de carne por estratos de productores y composición del stock. Años 2008 y 2009 (GLIMS data warehouse)                                                                                                                                                                                                         |
| Bolivia,<br>Plurinational State<br>of | 2008 | 1     | 8,189,599       | Instituto Nacional de Estadística, Bolivia: Encuesta Nacional Agropecuaria. Online data: <a href="http://www.gobernacionlapaz.gob.bo/archivos/Sec_Deptal/SDPD/DID/Estadistica_Deptal/Agropecuario/Resultados_ENA_2008/EncuestaNacionalAgropecuaria.pdf">http://www.gobernacionlapaz.gob.bo/archivos/Sec_Deptal/SDPD/DID/Estadistica_Deptal/Agropecuario/Resultados_ENA_2008/EncuestaNacionalAgropecuaria.pdf</a> |
| Brazil                                | 2009 | 2     | 205,225,804     | Istituto Brasileiro de Geografia e Estatística: Produção da Pecuária Municipal 2009. Online data: <a href="http://www.ibge.gov.br/home/estatistica/economia/ppm/2009/default.shtm">http://www.ibge.gov.br/home/estatistica/economia/ppm/2009/default.shtm</a>                                                                                                                                                    |
| Chile                                 | 2007 | 3     | 3,718,532       | Instituto Nacional de Estadísticas, Chile: Censo Agropecuario y Forestal 2007. Online data: <a href="http://www.ine.cl/canales/chile_estadistico/censos_agropecuarios/censo_agropecuario_07_comunas.php">http://www.ine.cl/canales/chile_estadistico/censos_agropecuarios/censo_agropecuario_07_comunas.php</a>                                                                                                  |
| Colombia                              | 2009 | 1     | 22,787,372      | Instituto Agropecuario, Colombia: Censo Agropecuario Nacional 2004 - 2009 (GLIMS data warehouse)                                                                                                                                                                                                                                                                                                                 |
| Ecuador                               | 2000 | 2     | 4,481,052       | Project SICA, Agricultural Information System, Ministry of Agriculture and Livestock, Ecuador: III Censo Nacional Agropecuario (GLIMS data warehouse)                                                                                                                                                                                                                                                            |
| Falkland Islands<br>(Malvinas)        | 2010 | 1     | 4,738           | Department of Agriculture, Falkland Islands Government: Statistics Book 2010 (GLIMS data warehouse)                                                                                                                                                                                                                                                                                                              |
| French Guiana                         | 2000 | 6     | 9,394           | Agreste la Statistique Agricole, Le Ministère de l'Agriculture, de l'Alimentation, de la Pêche et de la Ruralité, France: Recensement Agricole 2000. Online data: <a href="http://agreste.agriculture.gouv.fr/recensement-agricole-2010/resultats-donnees-chiffrees/">http://agreste.agriculture.gouv.fr/recensement-agricole-2010/resultats-donnees-chiffrees/</a>                                              |
| Paraguay                              | 2008 | 2     | 10,466,641      | Ministerio de Agricultura y Ganadería, Paraguay: Censo Agropecuario Nacional 2008 (GLIMS data warehouse)                                                                                                                                                                                                                                                                                                         |
| Peru                                  | 2010 | 1     | 5,520,197       | Instituto Nacional de Estadística e Informática, Peru: Compendio Estadístico 2011 (GLIMS data warehouse)                                                                                                                                                                                                                                                                                                         |
| Suriname                              | 1994 | 1     | 123,630         | Environmental Research Group Oxford, ERGO: ERGO, 1996 "Livestock Geography. A demonstration of GIS techniques applied to Global Livestock Systems and Populations", Animal Health Division, FAO, Rome (William Wint extracted from the agroecological zone estimates derived from the FAOSTAT data for 1994) (GLIMS data warehouse)                                                                              |
| Uruguay                               | 2010 | 1     | 11,092,285      | Ministerio de Ganadería, Agricultura y Pesca, Estadísticas Agropecuarias, Uruguay: Datos de la Declaración Jurada de DICOSE 2010 - Datos Generales de Lechería y de Suinos (GLIMS data warehouse)                                                                                                                                                                                                                |
| Venezuela,<br>Bolivarian Republic     | 2007 | 2     | 13,302,976      | Ministerio del Poder Popular para la Agricultura y Tierras - Venezuela: VII Censo Agrícola 2007. Online data: <a href="http://censo.mat.gob.ve/">http://censo.mat.gob.ve/</a>                                                                                                                                                                                                                                    |

No Data for: Aruba, Guyana, Trinidad and Tobago

## Oceania Tile

| COUNTRY                  | YEAR | LEVEL | Totals in GLIMS | SOURCE                                                                                                                                                                                                                                                                    |
|--------------------------|------|-------|-----------------|---------------------------------------------------------------------------------------------------------------------------------------------------------------------------------------------------------------------------------------------------------------------------|
| American Samoa           | 2003 | 1     | 300             | National Agricultural Statistics Service - United States Department of Agriculture: National Agricultural Census 2007. Online data: <a href="http://www.agcensus.usda.gov/Publications/2007/Full_Report/">http://www.agcensus.usda.gov/Publications/2007/Full_Report/</a> |
| Australia                | 2007 | 6     | 26,113,333      | Australian Bureau of Statistics: Agricultural commodities: small area data, Australia 2006-2007 (GLIMS data warehouse)                                                                                                                                                    |
| New Zealand              | 2010 | 1     | 9,617,244       | Statistics New Zealand: 2011 Livestock numbers by Regional Council. Online data: <a href="http://www.stats.govt.nz/tools_and_services/nzdotstat/agriculture-statistics.aspx">http://www.stats.govt.nz/tools_and_services/nzdotstat/agriculture-statistics.aspx</a>        |
| Northern Mariana Islands | 2007 | 1     | 1,395           | National Agricultural Statistics Service - United States Department of Agriculture: National Agricultural Census 2007. Online data: <a href="http://www.agcensus.usda.gov/Publications/2007/Full_Report/">http://www.agcensus.usda.gov/Publications/2007/Full_Report/</a> |
| Papua New Guinea         | 1989 | 1     | 62,888          | National Statistical Office: Agricultural Large Holdings 1989 (GLIMS data warehouse)                                                                                                                                                                                      |
| Tonga                    | 2001 | 1     | 10,354          | Ministry of Agriculture and Forestry, Kingdom of Tonga: Agriculture Census 2001. Online data: <a href="http://www.spc.int/prism/tonga/index.php/surveys/agriculture-census-2011">http://www.spc.int/prism/tonga/index.php/surveys/agriculture-census-2011</a>             |

No Data for: Ashmore and Cartier Islands, Cook Islands, Fiji, French Polynesia, Guam, Kiribati, Marshall Islands, Federated States of Micronesia, Nauru, New Caledonia, Niue, Norfolk Island, Palau, Pitcairn, Samoa, Solomon Islands, Tokelau, Tuvalu, Vanuatu, Wake Island, Wallis and Futuna

Supplementary information 5b – Country details sub-national statistics for pigs (year and level of observation) by continental tile.

**Africa Tile**

| COUNTRY                          | YEAR | LEVEL | Totals in GLIMS | SOURCE                                                                                                                                                                                                                                                                             |
|----------------------------------|------|-------|-----------------|------------------------------------------------------------------------------------------------------------------------------------------------------------------------------------------------------------------------------------------------------------------------------------|
| Algeria                          | 2002 | 1     | 5,702           | Direction des Services Vétérinaires - Ministère de l'Agriculture et du Développement Rural 2003 (GLIMS data warehouse)                                                                                                                                                             |
| Angola                           | 2009 | 1     | 3,984,614       | CountrySTAT - Food and agriculture data network: Número de animais vivos by Ano, Especie, Nivel administrativo. Online data: <a href="http://countrystat.org/home.aspx?c=AGO&amp;ta=007SPD035&amp;tr=21">http://countrystat.org/home.aspx?c=AGO&amp;ta=007SPD035&amp;tr=21</a>     |
| Benin                            | 2008 | 2     | 329,700         | CountrySTAT - Food and agriculture data network: Élevage - Total des effectifs d'animaux vivants 2010-2012. Online data: <a href="http://www.countrystat.org/home.aspx?c=BEN&amp;ta=053SPD135&amp;tr=21">http://www.countrystat.org/home.aspx?c=BEN&amp;ta=053SPD135&amp;tr=21</a> |
| Botswana                         | 2009 | 2     | 3,302           | Central Statistics Office of Botswana: 2009 and 2010 Annual Agricultural Surveys (GLIMS data warehouse)                                                                                                                                                                            |
| Burkina Faso                     | 2008 | 2     | 2,083,127       | Ministère de l'Economie et de Développement, Direction General des Prévisions et des Statistiques Agricoles: Les régions en chiffres, 2008 & 2010 (GLIMS data warehouse)                                                                                                           |
| Burundi                          | 2005 | 2     | 156,138         | Direction Provinciale de l'Agriculture et de l'Élevage, Burundi: Monographies des les Communes 2006 (GLIMS data warehouse))                                                                                                                                                        |
| Cameroon                         | 2007 | 2     | 218,080         | CountrySTAT - Food and agriculture data network (GLIMS data warehouse)                                                                                                                                                                                                             |
| Cape Verde                       | 2004 | 2     | 77,316          | Directorate of livestock, Cape Verde: Recenseamento Geral da Agricultura, 2004 (GLIMS data warehouse)                                                                                                                                                                              |
| Central African Republic         | 1990 | 1     | 441,480         | Environmental Research Group Oxford, ERGO: FAO, 2004. Agro-ecological distributions for Africa (GLIMS data warehouse)                                                                                                                                                              |
| Chad                             | 2007 | 1     | 39,220          | Direction de l'Élevage et des Ressources Animales: Effectifs du cheptel national par région administrative 2007 (GLIMS data warehouse)                                                                                                                                             |
| Congo                            | 2000 | 1     | 15,455          | Ministère de l'Agriculture et de l'Élevage: Enquête Agricole Pilote, Campagne Agricole 1999-2000 (GLIMS data warehouse)                                                                                                                                                            |
| Côte d'Ivoire                    | 2001 | 1     | 476,708         | Ministère de l'Agriculture et des Ressources Animales, Direction de la Programmation, Côte d'Ivoire: Recensement National de l'Agriculture 2001 (GLIMS data warehouse)                                                                                                             |
| Democratic Republic of the Congo | 2009 | 1     | 960,305         | Centre for Ticks and Tick-Borne Diseases: Preliminary census data from SADC and Eastern Africa (GLIMS data warehouse)                                                                                                                                                              |
| Eritrea                          | 2002 | 2     | 2,203           | Environmental Research Group Oxford, ERGO: GIEWS special reports. Online data: <a href="http://www.fao.org/docrep/005/y7678e/y7678e00.htm">http://www.fao.org/docrep/005/y7678e/y7678e00.htm</a>                                                                                   |
| Ethiopia                         | 2002 | 3     | 28,598          | Central Statistical Authority of Ethiopia: Agricultural Census 2001-2002 (GLIMS data warehouse)                                                                                                                                                                                    |
| Gabon                            | 2002 | 1     | 213,000         | Environmental Research Group Oxford, ERGO: FAO, 2004. Agro-ecological distributions for Africa (GLIMS data warehouse)                                                                                                                                                              |

|                       |      |   |           |                                                                                                                                                                                                                                                                                           |
|-----------------------|------|---|-----------|-------------------------------------------------------------------------------------------------------------------------------------------------------------------------------------------------------------------------------------------------------------------------------------------|
| Gambia                | 2007 | 1 | 24,281    | National Agriculture Development Agency, Gambia: National Agricultural Sample Survey Report (NASS), Oct. 2008 (GLIMS data warehouse)                                                                                                                                                      |
| Ghana                 | 1996 | 1 | 354,678   | Veterinary Services of Ghana: Livestock Census, 1994-1996 (GLIMS data warehouse)                                                                                                                                                                                                          |
| Guinea                | 2002 | 2 | 97,205    | Service National des Statistiques Agricoles, République de Guinée 2002 (GLIMS data warehouse)                                                                                                                                                                                             |
| Guinea-Bissau         | 1994 | 2 | 204,375   | Instituto Nacional de Estadística: Inquerito Annual sobre Superfície Rendimento e Producao. Campanha 93/94 (GLIMS data warehouse)                                                                                                                                                         |
| Kenya                 | 2005 | 3 | 310,154   | Ministry of Livestock Development, Kenya: Compilation of divisional data 2005 (GLIMS data warehouse)                                                                                                                                                                                      |
| Lesotho               | 2008 | 1 | 83,976    | Bureau of Statistics of Lesotho: Livestock winter 2008/09 Tables. Online data: <a href="http://www.bos.gov.ls/Downloads.htm">http://www.bos.gov.ls/Downloads.htm</a>                                                                                                                      |
| Madagascar            | 2002 | 3 | 460,805   | Direction des Ressources Animales: Situation de l'élevage a Madagascar 2002 (GLIMS data warehouse)                                                                                                                                                                                        |
| Malawi                | 2007 | 2 | 792,364   | Agriculture Statistics Division of the National Statistical Office of Malawi (NSO): National Census of Agriculture and Livestock (October 2006 - October 2007) (GLIMS data warehouse)                                                                                                     |
| Mali                  | 2010 | 1 | 75,089    | CountrySTAT - Food and agriculture data network: Élevage - Total des effectifs d'animaux vivants. Online data: <a href="http://www.countrystat.org/home.aspx?c=MLI&amp;tr=21">http://www.countrystat.org/home.aspx?c=MLI&amp;tr=21</a>                                                    |
| Mauritius             | 2010 | 1 | 22,327    | Central Statistic Office of Mauritius: Digest of Agricultural Statistics (July 2010) (GLIMS data warehouse)                                                                                                                                                                               |
| Morocco               | 2002 | 2 | 4,783     | Ministère de l'Agriculture, du Développement Rural et des Pêches Maritimes: Evolution des effective au niveau des provinces (GLIMS data warehouse)                                                                                                                                        |
| Mozambique            | 2010 | 1 | 1,340,712 | National Directorate of Livestock: Censo Agropecuario 2009-2010 (GLIMS data warehouse)                                                                                                                                                                                                    |
| Namibia               | 2006 | 1 | 52,485    | FAO Special Report, FAO/WFP Crop, Livestock and Food Security Assessment Mission to Namibia (GLIMS data warehouse)                                                                                                                                                                        |
| Niger                 | 2002 | 1 | 39,000    | Ministère des Ressources Animales: Revue des statistiques courantes sur l'élevage au Niger (GLIMS data warehouse)                                                                                                                                                                         |
| Nigeria               | 2007 | 1 | 2,444,096 | National Bureau of Statistics, Nigeria: Agricultural Census 2007 (GLIMS data warehouse)                                                                                                                                                                                                   |
| Réunion               | 2000 | 2 | 70,921    | Agreste la Statistique Agricole, Le Ministère de l'Agriculture, de l'Alimentation, de la Pêche et de la Ruralité, France: Recensement Agricole 2000. Online data: <a href="http://agriculture.gouv.fr/recensement-agricole-2010">http://agriculture.gouv.fr/recensement-agricole-2010</a> |
| Rwanda                | 2008 | 2 | 310,834   | National Institute of Statistics of Rwanda: National Agricultural Survey 2008 (Final report) (GLIMS data warehouse)                                                                                                                                                                       |
| Saint Helena          | 2009 | 1 | 773       | Agriculture and Natural Resources Department of St. Helena: Livestock Census 2009 (GLIMS data warehouse)                                                                                                                                                                                  |
| Sao Tome and Principe | 1997 | 2 | 13,495    | Ministère de l'Agriculture et de la Pêche: Enquête Agricole de Production 1997 (GLIMS data warehouse)                                                                                                                                                                                     |
| Senegal               | 2009 | 2 | 344,172   | Agence Nationale de la Statistique et de la Démographie du Sénégal: Live Data Base (LDB). Online data: <a href="http://www.ansd.sn/publications_SES_region.html">http://www.ansd.sn/publications_SES_region.html</a>                                                                      |
| Sierra Leone          | 2004 | 2 | 65,423    | Ministry of Agriculture & Food Security of Sierra Leone: 2004 Populations and Housing Census Statistical Office (GLIMS data warehouse)                                                                                                                                                    |

|                             |      |   |           |                                                                                                                                   |
|-----------------------------|------|---|-----------|-----------------------------------------------------------------------------------------------------------------------------------|
| Somalia                     | 2002 | 1 | 4,002     | Environmental Research Group Oxford, ERGO: FAO, 2004. Agro-ecological distributions for Africa (GLIMS data warehouse)             |
| South Africa                | 2002 | 2 | 1,979,931 | Directorate Veterinary Services, South Africa: Animal Disease Report, January to September 2003 (GLIMS data warehouse)            |
| Swaziland                   | 2010 | 1 | 38,915    | Directorate of Veterinary and Livestock Services: Swaziland Livestock Statistics, Census 2010 (GLIMS data warehouse)              |
| Togo                        | 2002 | 1 | 243,241   | Data from Dr. Guy Hendrickx (GLIMS data warehouse)                                                                                |
| Uganda                      | 2000 | 4 | 770,319   | Uganda Bureau of Statistics: Uganda Census 2000 (GLIMS data warehouse)                                                            |
| United Republic of Tanzania | 2008 | 2 | 1,592,600 | CountrySTAT - Food and agriculture data network (GLIMS data warehouse)                                                            |
| Zambia                      | 2009 | 1 | 517,553   | Department of Research and Specialist Services, Zambia: National Livestock Census by Province 1994 to 2009 (GLIMS data warehouse) |
| Zimbabwe                    | 2008 | 2 | 202,234   | Department of Livestock and Veterinary Services: Livestock Census Summary (GLIMS data warehouse)                                  |

---

No Data for: Bassas da India, British Indian Ocean Territory, Comoros, Djibouti, Egypt, Equatorial Guinea, Europa Island, Glorioso Island, Juan de Nova Island, Liberia, Libya, Mauritania, Mayotte, Seychelles, Sudan, Tromelin Island, Tunisia, Western Sahara

## Asia Tile

| COUNTRY         | YEAR | LEVEL | Totals in GLIMS | SOURCE                                                                                                                                                                                                                                                                                                                                                                    |
|-----------------|------|-------|-----------------|---------------------------------------------------------------------------------------------------------------------------------------------------------------------------------------------------------------------------------------------------------------------------------------------------------------------------------------------------------------------------|
| Armenia         | 2011 | 1     | 114,777         | National statistical service of the republic of Armenia: Atlas the Republic of Armenia by Regions and the Yerevan City, 2011. Online data: <a href="http://www.armstat.am/en/?nid=50">http://www.armstat.am/en/?nid=50</a>                                                                                                                                                |
| Azerbaijan      | 2011 | 1     | 6,146           | The State Statistical Committee of the Republic of Azerbaijan: The data on regions. Online data: <a href="http://www.stat.gov.az/source/agriculture/indexen.php">http://www.stat.gov.az/source/agriculture/indexen.php</a>                                                                                                                                                |
| Bangladesh      | 2009 | 2     | 206,872         | FAO - Emergency Center for Transboundary Animal Diseases (GLIMS data warehouse)                                                                                                                                                                                                                                                                                           |
| Belarus         | 2011 | 2     | 2,954,600       | National Statistical Committee of the Republic of Belarus: Agriculture of the Republic of Belarus, 2011 (GLIMS data warehouse)                                                                                                                                                                                                                                            |
| Bhutan          | 2009 | 2     | 21,532          | Ministry of agriculture and forest, Royal government of Bhutan: Dzongkhag livestock sector (GLIMS data warehouse)                                                                                                                                                                                                                                                         |
| Bulgaria        | 2010 | 6     | 664,000         | Ministry of Agriculture and Forestry - Agrostistics Directorate, Bulgaria: Agricultural Census 2010. Online data: <a href="http://www.mzh.government.bg/MZH/ShortLinks/SelskaPolitika/Agrostistics/Structure_agricultural_holdings/Results.aspx">http://www.mzh.government.bg/MZH/ShortLinks/SelskaPolitika/Agrostistics/Structure_agricultural_holdings/Results.aspx</a> |
| Cambodia        | 2011 | 2     | 2,076,990       | Ministry of Agriculture, Forestry and Fisheries: Cambodia Livestock Census 2011 (GLIMS data warehouse)                                                                                                                                                                                                                                                                    |
| China, mainland | 2006 | 3     | 510,417,525     | National Bureau of Statistics of China: China Statistical Yearbook, 2006. For Taiwan: Statistics Office, COA, Executive Yuan, Taiwan Statistical Yearbook, 2010 (GLIMS data warehouse)                                                                                                                                                                                    |
| Cyprus          | 2003 | 1     | 443,040         | Statistical Service of Cyprus: Census of Agriculture 2003. Online data: <a href="http://www.mof.gov.cy/mof/cystat/statistics.nsf/All/DE20AEA98C4DD6EEC22577A50041F0B8/\$file/Census_of_Agriculture-2003.pdf?OpenElement">http://www.mof.gov.cy/mof/cystat/statistics.nsf/All/DE20AEA98C4DD6EEC22577A50041F0B8/\$file/Census_of_Agriculture-2003.pdf?OpenElement</a>       |
| Georgia         | 2005 | 2     | 480,695         | AgroWeb Central Asia and Caucasus: Georgian National Association for Animal Production (GNAAP), 2005 (GLIMS data warehouse)                                                                                                                                                                                                                                               |
| India           | 2007 | 2     | 10,501,506      | Department of Animal Husbandry, Dairying & Fisheries, Ministry of Agriculture, India: Census of Agriculture, 2007 (GLIMS data warehouse)                                                                                                                                                                                                                                  |
| Indonesia       | 2011 | 1     | 5,854,781       | Department Pertanian Republik Indonesia: Buku Statistik, 2012 (GLIMS data warehouse)                                                                                                                                                                                                                                                                                      |
| Japan           | 2009 | 1     | 9,902,400       | Statistics Department, Minister's Secretariat, Ministry of Agriculture, Forestry and Fisheries: Japan Statistical Yearbook 2010. Online data: <a href="http://www.maff.go.jp/e/tokei/kikaku/nenji_e/85nenji/index.html">http://www.maff.go.jp/e/tokei/kikaku/nenji_e/85nenji/index.html</a>                                                                               |
| Kazakhstan      | 2004 | 1     | 1,341,300       | Agency on Statistics of the Republic of Kazakhstan: Main socio economic indicators of regions in Kazakhstan 2005. Almaty, Kazakhstan (GLIMS data warehouse)                                                                                                                                                                                                               |
| Kyrgyzstan      | 2003 | 1     | 105,476         | National Statistic Committee of Kyrgyzstan: Results of the first agricultural census of the Kyrgyz Republic of 2003 (Second Stage) (GLIMS data warehouse)                                                                                                                                                                                                                 |



|                                  |      |   |            |                                                                                                                                                                                                                                                                                                                                                                       |
|----------------------------------|------|---|------------|-----------------------------------------------------------------------------------------------------------------------------------------------------------------------------------------------------------------------------------------------------------------------------------------------------------------------------------------------------------------------|
| Lao People's Democratic Republic | 2009 | 2 | 2,663,363  | Department of Livestock and Fisheries, Laos: 2009 district data (David Bourn, "Environmental Animal Health Management Initiative for Enhanced Smallholder Production", 2010) (GLIMS data warehouse)                                                                                                                                                                   |
| Malaysia                         | 2001 | 1 | 2,038,278  | Department of Veterinary Service, Malaysia: Livestock Products statistics 1996-2002 (GLIMS data warehouse)                                                                                                                                                                                                                                                            |
| Myanmar                          | 2011 | 3 | 10,248,983 | Livestock Breeding and Veterinary Department (LBVD), Ministry of Livestock Breeding and Fisheries, Yangon, Myanmar: Myanmar Farm Animal Resources: Numbers and Distributions from Administrative Returns, 2011/12 (GLIMS data warehouse)                                                                                                                              |
| Nepal                            | 2009 | 3 | 1,021,122  | Ministry of Agriculture and Cooperatives (MOAC), Nepal: 2009 data (GLIMS data warehouse)                                                                                                                                                                                                                                                                              |
| Philippines                      | 2010 | 3 | 12,793,664 | Bureau of Agricultural Statistics (BAS): Livestock Survey Philippines 2010 (GLIMS data warehouse)                                                                                                                                                                                                                                                                     |
| Republic of Korea                | 2005 | 1 | 8,961,505  | Ministry of Agriculture & Forestry. Republic of Korea: Agricultural and Forestry Statistical Yearbook 2005 (GLIMS data warehouse)                                                                                                                                                                                                                                     |
| Republic of Moldova              | 2010 | 2 | 377,100    | Statistica Moldovei: Livestock in all categories of producers in territorial aspect, 2010. Online data: <a href="http://www.statistica.md/pageview.php?l=en&amp;idc=349">http://www.statistica.md/pageview.php?l=en&amp;idc=349</a>                                                                                                                                   |
| Romania                          | 2011 | 1 | 5,363,797  | National Institute of Statistics, Romania: Tempo online database/Agriculture/Livestock and Animal Production 2000-2011. Online data: <a href="https://statistici.insse.ro/shop/?lang=en">https://statistici.insse.ro/shop/?lang=en</a>                                                                                                                                |
| Russian Federation               | 2011 | 1 | 18,634,550 | Russian Federation - Federal State Statistical Service: Livestock and poultry production, 2011 and 2012. Online data: <a href="http://www.fedstat.ru/indicators/start.do">http://www.fedstat.ru/indicators/start.do</a>                                                                                                                                               |
| Sri Lanka                        | 2011 | 2 | 82,030     | Agriculture and Environment Statistics Division, Department of Census and Statistics, Sri Lanka: Livestock Population by Type and by District - 2003 – 2012. Online data: <a href="http://www.statistics.gov.lk/agriculture/Livestock/LivestockPopulationSubnational.html">http://www.statistics.gov.lk/agriculture/Livestock/LivestockPopulationSubnational.html</a> |
| Tajikistan                       | 2009 | 2 | 419        | Agency for Statistics, Tajikistan Republic: Regions of Tajikistan Republic, 2010 (GLIMS data warehouse)                                                                                                                                                                                                                                                               |
| Thailand                         | 2006 | 1 | 11,763,705 | Regional Data Exchange System on Food and Agricultural Statistics in Asia and Pacific Countries: Thailand sub national Statistics. Online data: <a href="http://www.fao.org/apcas.org/thailand.html">http://www.fao.org/apcas.org/thailand.html</a>                                                                                                                   |
| Turkey                           | 2009 | 2 | 1,896      | Turkish Statistical Institute: Livestock statistics database 2009 (GLIMS data warehouse)                                                                                                                                                                                                                                                                              |
| Ukraine                          | 2011 | 1 | 7,960,400  | State statistics committee Ukraine: Head of livestock and poultry by regions (GLIMS data warehouse)                                                                                                                                                                                                                                                                   |
| Uzbekistan                       | 2001 | 1 | 81,600     | State Statistics Department of Uzbekistan: Agriculture of Uzbekistan, 2001. Minmakroekonomstat of Republic Uzbekistan, State Statistics Department of Uzbekistan Tashkent, 2002 (GLIMS data warehouse)                                                                                                                                                                |
| Viet Nam                         | 2001 | 6 | 21,445,693 | General Statistics Office of Vietnam: Agricultural Census database 2001. Online data: <a href="http://www.gso.gov.vn/default_en.aspx?tabid=477&amp;idmid=4&amp;ItemID=1824">http://www.gso.gov.vn/default_en.aspx?tabid=477&amp;idmid=4&amp;ItemID=1824</a>                                                                                                           |

No Data for: Afghanistan, Bahrain, Brunei Darussalam, Christmas Island, Cocos (Keeling) Islands, Democratic People's Republic of Korea, Islamic Republic of Iran, Iraq, Israel, Jordan, Kuril Islands, Kuwait, Lebanon, Liancourt Rock, Maldives, Mongolia, Oman, Pakistan, Paracel Islands, Qatar, Saudi Arabia, Scarborough Reef, Senkaku Islands, Singapore, Spratly Islands, Syrian Arab Republic, Timor-Leste, Turkmenistan, United Arab Emirates, Yemen

## Europe Tile

| COUNTRY                | YEAR | LEVEL | Totals in GLIMS | SOURCE                                                                                                                                                                                                                                                                                                                                                              |
|------------------------|------|-------|-----------------|---------------------------------------------------------------------------------------------------------------------------------------------------------------------------------------------------------------------------------------------------------------------------------------------------------------------------------------------------------------------|
| Albania                | 2010 | 1     | 164,500         | Institute of Statics, Albania: Agricultural sector, Livestock 2001-2010 (GLIMS data warehouse)                                                                                                                                                                                                                                                                      |
| Austria                | 2010 | 1     | 3,134,156       | Statistics Austria: Livestock Survey, 2010 (GLIMS data warehouse)                                                                                                                                                                                                                                                                                                   |
| Belgium                | 2010 | 2     | 6,429,600       | EUROSTAT online database. General Statistics, Region, Agriculture, Animal Populations and Land Use. Online data: <a href="http://epp.eurostat.ec.europa.eu/portal/page/portal/agriculture/data/">http://epp.eurostat.ec.europa.eu/portal/page/portal/agriculture/data/</a>                                                                                          |
| Bosnia and Herzegovina | 2009 | 6     | 529,095         | Federal Office of Statistics of Federation of Bosnia and Herzegovina: Number of animals from Federal Agro-Mediterranean Institute of Mostar (GLIMS data warehouse)                                                                                                                                                                                                  |
| Croatia                | 2003 | 1     | 1,726,895       | Central bureau of statistics, Republic of Croatia: Agricultural Census 2003. Online data: <a href="http://www.dzs.hr/default_e.htm">http://www.dzs.hr/default_e.htm</a>                                                                                                                                                                                             |
| Czech Republic         | 2010 | 2     | 1,906,929       | Czech Statistical Office: Agrocensus regions: Farm Structure Survey and Survey on Agricultural Production Methods 2010. Online data: <a href="http://www.czso.cz/csu/2012edicniplan.nsf/engp/2127-12">http://www.czso.cz/csu/2012edicniplan.nsf/engp/2127-12</a>                                                                                                    |
| Denmark                | 2010 | 2     | 13,173,060      | Denmark Statistics: Farms by region and selected farms, crops and livestock. Online data: <a href="http://www.statistikbanken.dk/statbank5a/SelectVarVal/Define.asp?Maintable=BDF51&amp;PLanguage=1">http://www.statistikbanken.dk/statbank5a/SelectVarVal/Define.asp?Maintable=BDF51&amp;PLanguage=1</a>                                                           |
| Estonia                | 2001 | 2     | 327,195         | Statistikaamet Statistical Office of Estonia: Agricultural Census 2001. Online data: <a href="http://www.stat.ee/agricultural-census-2001">http://www.stat.ee/agricultural-census-2001</a>                                                                                                                                                                          |
| Finland                | 2010 | 6     | 1,366,800       | The Information Centre of the Ministry of Agriculture and Forestry, Finland: Yearbook of Farm Statistics 2011 (GLIMS data warehouse)                                                                                                                                                                                                                                |
| France                 | 2009 | 2     | 13,245,288      | Service de la Statistique et de la Prospective (SSP): Statistique Agricole Annuelle (GLIMS data warehouse)                                                                                                                                                                                                                                                          |
| Germany                | 2007 | 2     | 25,247,881      | Federal Statistical Office, Germany: GENESIS database. Online data: <a href="https://www.regionalstatistik.de/genesis/online/online;jsessionid=EE45147898822814978BE734145275C4?operation=sprachwechsel&amp;option=en">https://www.regionalstatistik.de/genesis/online/online;jsessionid=EE45147898822814978BE734145275C4?operation=sprachwechsel&amp;option=en</a> |
| Greece                 | 2007 | 2     | 1,111,540       | Hellenic Statistic Authority (EL.STAT): Farms and number of animals by type, region and county (GLIMS data warehouse)                                                                                                                                                                                                                                               |
| Hungary                | 2010 | 1     | 3,169,000       | Hungarian Central Statistical Office: Regional Statistics. Online data: <a href="http://www.ksh.hu/agriculture">http://www.ksh.hu/agriculture</a>                                                                                                                                                                                                                   |
| Iceland                | 2010 | 2     | 3,615           | Statistics Iceland: 2010 data (GLIMS data warehouse)                                                                                                                                                                                                                                                                                                                |
| Ireland                | 2000 | 1     | 1,722,108       | Central Statistical Office Ireland: Census of Agriculture 2000. Online data: <a href="http://www.cso.ie/en/releasesandpublications/agricultureandfishing/censusoofagricultureandfishingresultsjune2000/">http://www.cso.ie/en/releasesandpublications/agricultureandfishing/censusoofagricultureandfishingresultsjune2000/</a>                                      |
| Italy                  | 2010 | 3     | 9,331,143       | Istituto Nazionale di Statistica: Censimento Agricoltura 2010. Online data: <a href="http://dati-censimentoagricoltura.istat.it">http://dati-censimentoagricoltura.istat.it</a>                                                                                                                                                                                     |
| Latvia                 | 2001 | 1     | 368,909         | Central Statistical Bureau of Latvia: Results of 2001 Agricultural Census. Online data: <a href="http://www.csb.gov.lv/en/dati/agricultural-census-2001-30765.html">http://www.csb.gov.lv/en/dati/agricultural-census-2001-30765.html</a>                                                                                                                           |

|                                           |      |   |            |                                                                                                                                                                                                                                                                                          |
|-------------------------------------------|------|---|------------|------------------------------------------------------------------------------------------------------------------------------------------------------------------------------------------------------------------------------------------------------------------------------------------|
| Liechtenstein                             | 2009 | 6 | 1,811      | Amt für Statistik Liechtenstein: Landwirtschaftsstatistik 2009 (GLIMS data warehouse)                                                                                                                                                                                                    |
| Lithuania                                 | 2010 | 2 | 942,163    | Lietuvos Statistika Departamenta: Number of livestock by administrative territory, 2011 (GLIMS data warehouse)                                                                                                                                                                           |
| Luxembourg                                | 2008 | 2 | 77,841     | Portail des statistiques du Grand-Duché de Luxembourg (STATEC): Recensement Agricole, 2008 (GLIMS data warehouse)                                                                                                                                                                        |
| Malta                                     | 2010 | 6 | 70,593     | National Statistics Office of Malta: Census of Agriculture 2010. Online data:<br><a href="http://www.nso.gov.mt/statdoc/document_view.aspx?id=3287&amp;backurl=/themes/theme_page.aspx">http://www.nso.gov.mt/statdoc/document_view.aspx?id=3287&amp;backurl=/themes/theme_page.aspx</a> |
| Montenegro                                | 2010 | 1 | 41,118     | Statistical office of Montenegro (MONSTAT): Agriculture Census 2010. Online data:<br><a href="http://www.monstat.org/eng/page.php?id=58&amp;pageid=58">http://www.monstat.org/eng/page.php?id=58&amp;pageid=58</a>                                                                       |
| Netherlands                               | 2010 | 2 | 12,254,972 | Centraal Bureau voor de Statistiek, Netherlands: Agriculture: crops, livestock and land use by general far type, region - 2011 (GLIMS data warehouse)                                                                                                                                    |
| Norway                                    | 2010 | 1 | 1,607,772  | Statistics Norway: Agriculture Statistics 2011 (GLIMS data warehouse)                                                                                                                                                                                                                    |
| Poland                                    | 2009 | 1 | 14,278,600 | Central Statistical Office, Poland: Statistical Yearbook of Agriculture 2010 (GLIMS data warehouse)                                                                                                                                                                                      |
| Portugal                                  | 2009 | 2 | 1,851,290  | Instituto Nacional de Estatística - Statistics Portugal: Agricultural Census 2009. Online data:<br><a href="http://ra09.ine.pt/xportal/xmain?xpid=RA2009&amp;xpgid=ra_home">http://ra09.ine.pt/xportal/xmain?xpid=RA2009&amp;xpgid=ra_home</a>                                           |
| Serbia                                    | 2006 | 1 | 3,998,927  | Statistical Office of Serbia: Municipalities of Serbia 2007 (GLIMS data warehouse)                                                                                                                                                                                                       |
| Slovakia                                  | 2009 | 2 | 740,862    | Statistical Office of the Slovak Republic: Livestock by territory, products and period. Online data:<br><a href="http://px-web.statistics.sk/PXWebSlovak/DATABASE/En/databasetree.asp">http://px-web.statistics.sk/PXWebSlovak/DATABASE/En/databasetree.asp</a>                          |
| Slovenia                                  | 2010 | 2 | 308,540    | Statistical Office of the Republic of Slovenia: Agricultural Census Slovenia 2010. Online data:<br><a href="http://www.stat.si/eng/novica_prikazi.aspx?id=4594">http://www.stat.si/eng/novica_prikazi.aspx?id=4594</a>                                                                   |
| Spain                                     | 2010 | 2 | 25,704,041 | Ministerio de Medio Ambiente y Medio Rural y Marino, Gobierno de España (MARM): Encuestas Ganaderas, 2010 (GLIMS data warehouse)                                                                                                                                                         |
| Sweden                                    | 2009 | 1 | 1,528,740  | Statistics Sweden: Yearbook of Agricultural Statistics 2010 (GLIMS data warehouse)                                                                                                                                                                                                       |
| Switzerland                               | 2009 | 1 | 1,557,204  | Swiss Federal Statistical Office: Recensement des entreprises agricoles, 1999-2009 (GLIMS data warehouse)                                                                                                                                                                                |
| The former Yugoslav Republic of Macedonia | 2006 | 2 | 173,185    | State Statistic Office of the Republic of Macedonia: Census of Agriculture 2007. Online data:<br><a href="http://www.stat.gov.mk/PrikaziPublikacija_en.aspx?id=51&amp;rbr=205">http://www.stat.gov.mk/PrikaziPublikacija_en.aspx?id=51&amp;rbr=205</a>                                   |
| United Kingdom                            | 2009 | 2 | 4,525,710  | Office for National Statistics, U.K.: Statistics by Region. Online data:<br><a href="http://www.statistics.gov.uk/hub/regional-statistics/">http://www.statistics.gov.uk/hub/regional-statistics/</a>                                                                                    |

No Data for: Andorra, Faroe Islands, Gibraltar, Guernsey, Holy See, Isle of Man, Jersey, Madeira Islands, Monaco, San Marino, Svalbard and Jan Mayen Islands

## North America Tile

| COUNTRY        | YEAR | LEVEL | Totals in GLIMS | SOURCE                                                                                                                                                                                                                                                                                                                                                                                                 |
|----------------|------|-------|-----------------|--------------------------------------------------------------------------------------------------------------------------------------------------------------------------------------------------------------------------------------------------------------------------------------------------------------------------------------------------------------------------------------------------------|
| Belize         | 2003 | 1     | 21,224          | Ministry Of Agriculture, Fisheries and Cooperatives, Belize: Annual Report 2003. Online data: <a href="http://www.agriculture.gov.bz/PDF/Annual_Report_2003.pdf">http://www.agriculture.gov.bz/PDF/Annual_Report_2003.pdf</a>                                                                                                                                                                          |
| Canada         | 2006 | 2     | 14,168,313      | Statistics Canada: 2006 Census of Agriculture. Online data: <a href="http://www.statcan.gc.ca/ca-ra2006/index-eng.htm">http://www.statcan.gc.ca/ca-ra2006/index-eng.htm</a>                                                                                                                                                                                                                            |
| Cayman Islands | 2009 | 1     | 1,063           | Economics and Statistics Office - Government of the Cayman Islands: Statistical Compendium 2009 (GLIMS data warehouse)                                                                                                                                                                                                                                                                                 |
| Costa Rica     | 2006 | 1     | 297,359         | Ministerio de Agricultura y Ganadería, Costa Rica: Programa Nacional de Sanidad Porcina 2006 (GLIMS data warehouse)                                                                                                                                                                                                                                                                                    |
| El Salvador    | 2007 | 2     | 165,866         | Ministerio de Economía - El Salvador: IV Censo Agropecuario 2007-2008 (GLIMS data warehouse)                                                                                                                                                                                                                                                                                                           |
| Guadeloupe     | 2000 | 1     | 25,839          | Agreste la Statistique Agricole, Le Ministère de l'Agriculture, de l'Alimentation, de la Pêche et de la Ruralité, France: Recensement Agricole 2000. Online data: <a href="http://agreste.agriculture.gouv.fr/recensement-agricole-2010/resultats-donnees-chiffrees/">http://agreste.agriculture.gouv.fr/recensement-agricole-2010/resultats-donnees-chiffrees/</a>                                    |
| Guatemala      | 2003 | 2     | 419,170         | Instituto Nacional de Estadística, Guatemala: IV Censo Nacional Agropecuario 2003. Online data: <a href="http://www.ine.gob.gt/np/agropecuario/tomo%20IV.pdf">http://www.ine.gob.gt/np/agropecuario/tomo%20IV.pdf</a>                                                                                                                                                                                  |
| Jamaica        | 2009 | 1     | 361,540         | Agricultural Business Information System, Jamaica: Livestock Summary Report, 2009 (GLIMS data warehouse)                                                                                                                                                                                                                                                                                               |
| Martinique     | 2000 | 1     | 20,621          | Agreste la Statistique Agricole, Le Ministère de l'Agriculture, de l'Alimentation, de la Pêche et de la Ruralité, France: Recensement Agricole 2000. Online data: <a href="http://agreste.agriculture.gouv.fr/recensement-agricole-2010/resultats-donnees-chiffrees/">http://agreste.agriculture.gouv.fr/recensement-agricole-2010/resultats-donnees-chiffrees/</a>                                    |
| Mexico         | 2007 | 2     | 8,964,101       | Instituto Nacional de Estadística Geografía e Informática, México: Censo Agrícola, Ganadero y Forestal 2007. Online data: <a href="http://www.inegi.org.mx/est/contenidos/proyectos/Agro/ca2007/Resultados_Agricola/default.aspx">http://www.inegi.org.mx/est/contenidos/proyectos/Agro/ca2007/Resultados_Agricola/default.aspx</a>                                                                    |
| Nicaragua      | 2001 | 2     | 383,172         | Instituto Nacional de Estadística y Censos, Nicaragua: III Censo Nacional Agropecuario 2001 (GLIMS data warehouse)                                                                                                                                                                                                                                                                                     |
| Panama         | 2001 | 2     | 312,102         | Instituto Nacional de Estadística y Censo: Existencia de animales en la República, por clase de animal, según provincia: 21 de abril de 1991 al 22 abril de 2001. Online data: <a href="http://www.contraloria.gob.pa/inec/Avance/Avance.aspx?ID_CATEGORIA=2&amp;ID_CIFRAS=8&amp;ID_IDIOMA=1">http://www.contraloria.gob.pa/inec/Avance/Avance.aspx?ID_CATEGORIA=2&amp;ID_CIFRAS=8&amp;ID_IDIOMA=1</a> |
| Puerto Rico    | 2007 | 2     | 63,585          | National Agricultural Statistics Service - United States Department of Agriculture: National Agricultural Census 2007. Online data: <a href="http://www.agcensus.usda.gov/Publications/2007/Full_Report/">http://www.agcensus.usda.gov/Publications/2007/Full_Report/</a>                                                                                                                              |
| Saint Lucia    | 2007 | 6     | 19,520          | Ministry of Agriculture, Forestry and Fisheries: Census of Agriculture - Final report 2007. Online data: <a href="http://www.govt.lc/www/publications/AgricultureCensus2007.pdf">http://www.govt.lc/www/publications/AgricultureCensus2007.pdf</a>                                                                                                                                                     |

|                                  |      |   |            |                                                                                                                                                                                                                                                                           |
|----------------------------------|------|---|------------|---------------------------------------------------------------------------------------------------------------------------------------------------------------------------------------------------------------------------------------------------------------------------|
| Saint Vincent and the Grenadines | 2000 | 1 | 4,807      | Ministry of Agriculture and Labour, Government of Saint Vincent and the Grenadines: National Agricultural Census 2000 (GLIMS data warehouse)                                                                                                                              |
| United States of America         | 2007 | 2 | 67,239,043 | National Agricultural Statistics Service - United States Department of Agriculture: National Agricultural Census 2007. Online data: <a href="http://www.agcensus.usda.gov/Publications/2007/Full_Report/">http://www.agcensus.usda.gov/Publications/2007/Full_Report/</a> |

---

No Data for: Anguilla, Antigua and Barbuda, Bahamas, Barbados, Bermuda, Bird Island, British Virgin Islands, Cuba, Dominica, Dominican Republic, Grenada, Haiti, Honduras, Montserrat, Netherlands Antilles, Saint Kitts and Nevis, Turks and Caicos Islands, United States Virgin Islands

## South America Tile

| COUNTRY                               | YEAR | LEVEL | Totals in GLIMS | SOURCE                                                                                                                                                                                                                                                                                                                                                                                                           |
|---------------------------------------|------|-------|-----------------|------------------------------------------------------------------------------------------------------------------------------------------------------------------------------------------------------------------------------------------------------------------------------------------------------------------------------------------------------------------------------------------------------------------|
| Argentina                             | 2002 | 2     | 2,184,445       | Instituto Nacional de Estadística y Censos. Argentina: Censo Nacional Agropecuario 2002 (CNA 2002). Online data: <a href="http://www.indec.gov.ar/agropecuario/cna_principal.asp">http://www.indec.gov.ar/agropecuario/cna_principal.asp</a>                                                                                                                                                                     |
| Bolivia,<br>Plurinational State<br>of | 2008 | 1     | 2,640,615       | Instituto Nacional de Estadística, Bolivia: Encuesta Nacional Agropecuaria. Online data: <a href="http://www.gobernacionlapaz.gob.bo/archivos/Sec_Deptal/SDPD/DID/Estadistica_Deptal/Agropecuario/Resultados_ENA_2008/EncuestaNacionalAgropecuaria.pdf">http://www.gobernacionlapaz.gob.bo/archivos/Sec_Deptal/SDPD/DID/Estadistica_Deptal/Agropecuario/Resultados_ENA_2008/EncuestaNacionalAgropecuaria.pdf</a> |
| Brazil                                | 2009 | 2     | 38,045,454      | Istituto Brasileiro de Geografia e Estatística: Produção da Pecuária Municipal 2009. Online data: <a href="http://www.ibge.gov.br/home/estatistica/economia/ppm/2009/default.shtm">http://www.ibge.gov.br/home/estatistica/economia/ppm/2009/default.shtm</a>                                                                                                                                                    |
| Chile                                 | 2007 | 3     | 2,928,606       | Instituto Nacional de Estadísticas, Chile: Censo Agropecuario y Forestal 2007. Online data: <a href="http://www.ine.cl/canales/chile_estadistico/censos_agropecuarios/censo_agropecuario_07_comunas.php">http://www.ine.cl/canales/chile_estadistico/censos_agropecuarios/censo_agropecuario_07_comunas.php</a>                                                                                                  |
| Colombia                              | 2009 | 1     | 3,908,962       | Instituto Agropecuario, Colombia: Censo Agropecuario Nacional 2004 - 2009 (GLIMS data warehouse)                                                                                                                                                                                                                                                                                                                 |
| Ecuador                               | 2009 | 6     | 1,042,022       | Instituto Nacional de Estadística y Censos, Ecuador: Encuesta Nacional de Superficie y Producción Agropecuaria Continua (ESPAC) (GLIMS data warehouse)                                                                                                                                                                                                                                                           |
| Falkland Islands<br>(Malvinas)        | 2010 | 1     | 89              | Department of Agriculture, Falkland Islands Government: Statistics Book 2010 (GLIMS data warehouse)                                                                                                                                                                                                                                                                                                              |
| French Guiana                         | 2000 | 6     | 8,087           | Agreste la Statistique Agricole, Le Ministère de l'Agriculture, de l'Alimentation, de la Pêche et de la Ruralité, France: Recensement Agricole 2000. Online data: <a href="http://agreste.agriculture.gouv.fr/recensement-agricole-2010/resultats-donnees-chiffrees/">http://agreste.agriculture.gouv.fr/recensement-agricole-2010/resultats-donnees-chiffrees/</a>                                              |
| Paraguay                              | 2008 | 2     | 1,072,655       | Ministerio de Agricultura y Ganadería, Paraguay: Censo Agropecuario Nacional 2008 (GLIMS data warehouse)                                                                                                                                                                                                                                                                                                         |
| Peru                                  | 2006 | 1     | 3,034,134       | Instituto Nacional de Estadística e Informática, Peru: Compendio Estadístico 2007 (GLIMS data warehouse)                                                                                                                                                                                                                                                                                                         |
| Suriname                              | 1994 | 1     | 42,639          | Environmental Research Group Oxford, ERGO: ERGO, 1996 "Livestock Geography. A demonstration of GIS techniques applied to Global Livestock Systems and Populations", Animal Health Division, FAO, Rome (William Wint extracted from the agroecological zone estimates derived from the FAOSTAT data for 1994) (GLIMS data warehouse)                                                                              |
| Trinidad and<br>Tobago                | 2010 | 6     | 35,273          | Central Statistical Office - Ministry of Planning & Development Government of the Republic of Trinidad & Tobago: Pig Bulletin 2010 (GLIMS data warehouse)                                                                                                                                                                                                                                                        |
| Uruguay                               | 2010 | 1     | 177,914         | Ministerio de Ganadería, Agricultura y Pesca, Estadísticas Agropecuarias, Uruguay: Datos de la Declaración Jurada de DICOSE 2010 - Datos Generales de Lechería y de Suinos (GLIMS data warehouse)                                                                                                                                                                                                                |
| Venezuela,<br>Bolivarian Republic     | 2007 | 2     | 2,787,338       | Ministerio del Poder Popular para la Agricultura y Tierras - Venezuela: VII Censo Agrícola 2007. Online data: <a href="http://censo.mat.gob.ve/">http://censo.mat.gob.ve/</a>                                                                                                                                                                                                                                    |

No Data for: Aruba, Guyana

## Oceania Tile

| COUNTRY                  | YEAR | LEVEL | Totals in GLIMS | SOURCE                                                                                                                                                                                                                                                                                                                                                                                     |
|--------------------------|------|-------|-----------------|--------------------------------------------------------------------------------------------------------------------------------------------------------------------------------------------------------------------------------------------------------------------------------------------------------------------------------------------------------------------------------------------|
| American Samoa           | 2008 | 1     | 16,904          | National Agricultural Statistics Service - United States Department of Agriculture: National Agricultural Census 2007. Online data: <a href="http://www.agcensus.usda.gov/Publications/2007/Full_Report/">http://www.agcensus.usda.gov/Publications/2007/Full_Report/</a>                                                                                                                  |
| Australia                | 2007 | 6     | 2,469,334       | Australian Bureau of Statistics: Agricultural commodities: small area data, Australia 2006-2007 (GLIMS data warehouse)                                                                                                                                                                                                                                                                     |
| New Caledonia            | 2002 | 2     | 25,447          | Institut de la Statistique et des Etudes Economiques (ISEE): Recensement Général Agricole (RGA) 2002. Online data: <a href="http://www.davar.gouv.nc/portal/page/portal/davar/secteur_rural/statistiques_agricoles/donnees_synthese/recensement_agricole">http://www.davar.gouv.nc/portal/page/portal/davar/secteur_rural/statistiques_agricoles/donnees_synthese/recensement_agricole</a> |
| New Zealand              | 2010 | 1     | 302,073         | Statistics New Zealand: 2011 livestock numbers by Regional council. Online data: <a href="http://www.stats.govt.nz/tools_and_services/nzdotstat/agriculture-statistics.aspx">http://www.stats.govt.nz/tools_and_services/nzdotstat/agriculture-statistics.aspx</a>                                                                                                                         |
| Northern Mariana Islands | 2007 | 1     | 2,242           | National Agricultural Statistics Service - United States Department of Agriculture: National Agricultural Census 2007. Online data: <a href="http://www.agcensus.usda.gov/Publications/2007/Full_Report/">http://www.agcensus.usda.gov/Publications/2007/Full_Report/</a>                                                                                                                  |
| Tonga                    | 2001 | 1     | 113,580         | Ministry of Agriculture and Forestry, Kingdom of Tonga: Agriculture Census 2001. Online data: <a href="http://www.spc.int/prism/tonga/index.php/surveys/agriculture-census-2011">http://www.spc.int/prism/tonga/index.php/surveys/agriculture-census-2011</a>                                                                                                                              |

No Data for: Ashmore and Cartier Islands, Cook Islands, Fiji, French Polynesia, Guam, Kiribati, Marshall Islands, Federated States of Micronesia, Nauru, Niue, Norfolk Island, Palau, Papua New Guinea, Pitcairn, Samoa, Solomon Islands, Tokelau, Tuvalu, Vanuatu, Wake Island, Wallis and Futuna

Supplementary information 5c – Country details on sub-national statistics for chickens (year and level of observation) by continental tile.

**Africa Tile**

| COUNTRY                          | YEAR | LEVEL | Totals in GLIMS | SOURCE                                                                                                                                                                                                                                                                             |
|----------------------------------|------|-------|-----------------|------------------------------------------------------------------------------------------------------------------------------------------------------------------------------------------------------------------------------------------------------------------------------------|
| Angola                           | 2010 | 1     | 17,118,618      | CountrySTAT - Food and agriculture data network: Número de animais vivos by Ano, Especie, Nivel administrativo 1. Online data: <a href="http://countrystat.org/home.aspx?c=AGO&amp;ta=007SPD035&amp;tr=21">http://countrystat.org/home.aspx?c=AGO&amp;ta=007SPD035&amp;tr=21</a>   |
| Benin                            | 2009 | 2     | 15,286,300      | CountrySTAT - Food and agriculture data network: Élevage - Total des effectifs d'animaux vivants 2010-2012. Online data: <a href="http://www.countrystat.org/home.aspx?c=BEN&amp;ta=053SPD135&amp;tr=21">http://www.countrystat.org/home.aspx?c=BEN&amp;ta=053SPD135&amp;tr=21</a> |
| Botswana                         | 2006 | 1     | 1,639,141       | Central Statistics Office Republic of Botswana: Botswana Agricultural Census Report. Ministry of Finance and Development Planning, 2007 (GLIMS data warehouse)                                                                                                                     |
| Burkina Faso                     | 2008 | 2     | 28,267,052      | Ministère des Ressources Animales: Les Statistiques du Secteur de l'Élevage au Burkina Faso, 2003 & 2008 (GLIMS data warehouse)                                                                                                                                                    |
| Burundi                          | 2007 | 1     | 1,267,675       | CountrySTAT - Food and agriculture data network: Élevage - Total des effectifs d'animaux vivants. . Online data: <a href="http://www.countrystat.org/home.aspx?c=BDI&amp;ta=029SPD035&amp;tr=21">http://www.countrystat.org/home.aspx?c=BDI&amp;ta=029SPD035&amp;tr=21</a>         |
| Côte d'Ivoire                    | 2001 | 1     | 17,125,712      | Ministère de l'Agriculture et des Ressources Animales, Direction de la Programmation, Côte d'Ivoire: Recensement National de l'Agriculture 2001 (GLIMS data warehouse)                                                                                                             |
| Cameroon                         | 2007 | 2     | 11,411,072      | CountrySTAT - Food and agriculture data network (GLIMS data warehouse)                                                                                                                                                                                                             |
| Cape Verde                       | 2004 | 2     | 327,562         | Directorate of Livestock, Cape Verde: Recenseamento Geral da Agricultura, 2004 (GLIMS data warehouse)                                                                                                                                                                              |
| Central African Republic         | 1990 | 1     | 2,773,110       | Environmental Research Group Oxford, ERGO: FAO, 2004. Agro-ecological distributions for Africa (GLIMS data warehouse)                                                                                                                                                              |
| Chad                             | 2009 | 1     | 47,867,370      | Ministère de l'Élevage et des Ressources Animales: Revue du secteur avicole (GLIMS data warehouse)                                                                                                                                                                                 |
| Comoros                          | 2000 | 1     | 221,550         | FAO Animal Production and Health Division: Rapport National Sur l'Etat des Ressources Génétiques Animales (GLIMS data warehouse)                                                                                                                                                   |
| Democratic Republic of the Congo | 1994 | 1     | 20,561,809      | Services national des Statistiques Agricoles 1994 (GLIMS data warehouse)                                                                                                                                                                                                           |
| Egypt                            | 2005 | 1     | 68,452,380      | Economic Affaire Sector, Ministry of Agriculture and Land Reclamation, Egypt: Poultry in the 21st century (GLIMS data warehouse)                                                                                                                                                   |
| Ethiopia                         | 2010 | 2     | 49,286,935      | Central Statistical Authority, Ethiopia: Agricultural Sample Survey 2008 and 2010 (GLIMS data warehouse)                                                                                                                                                                           |
| Gabon                            | 2002 | 1     | 3,100,001       | Environmental Research Group Oxford, ERGO: FAO, 2004. Agro-ecological distributions for Africa (GLIMS data warehouse)                                                                                                                                                              |



|                       |      |   |            |                                                                                                                                                                                                                                                                                                                                                                                                |
|-----------------------|------|---|------------|------------------------------------------------------------------------------------------------------------------------------------------------------------------------------------------------------------------------------------------------------------------------------------------------------------------------------------------------------------------------------------------------|
| Gambia                | 2007 | 1 | 820,438    | National Agriculture Development Agency, Gambia: National Agricultural Sample Survey Report (NASS), Oct. 2008 (GLIMS data warehouse)                                                                                                                                                                                                                                                           |
| Ghana                 | 2009 | 1 | 33,140,820 | CountrySTAT - Food and agriculture data network (GLIMS data warehouse)                                                                                                                                                                                                                                                                                                                         |
| Guinea                | 2002 | 2 | 13,213,984 | Service National des Statistiques Agricoles, République de Guinée 2002 (GLIMS data warehouse)                                                                                                                                                                                                                                                                                                  |
| Guinea-Bissau         | 1994 | 2 | 729,029    | Instituto Nacional de Estadística: Inquérito Anual sobre Superficie Rendimiento e Producao. Campanha 93/94 (GLIMS data warehouse)                                                                                                                                                                                                                                                              |
| Kenya                 | 2009 | 2 | 32,217,042 | Kenya National Bureau of Statistics: Kenyan Livestock Population 2009 (GLIMS data warehouse)                                                                                                                                                                                                                                                                                                   |
| Lesotho               | 2008 | 1 | 715,576    | Bureau of Statistics of Lesotho: Livestock winter 2008/09 Tables. Online data: <a href="http://www.bos.gov.ls/Downloads.htm">http://www.bos.gov.ls/Downloads.htm</a>                                                                                                                                                                                                                           |
| Madagascar            | 2005 | 3 | 24,213,520 | Ministère de l'Agriculture, Secrétariat General, Direction de la Prévision et des Etudes Economiques, Madagascar: Recensement de l'agriculture (RA) - Campagne agricole 2004-2005 (GLIMS data warehouse)                                                                                                                                                                                       |
| Malawi                | 2007 | 2 | 7,557,745  | Agriculture Statistics Division of the National Statistical Office of Malawi (NSO): National Census of Agriculture and Livestock (October 2006 - October 2007) (GLIMS data warehouse)                                                                                                                                                                                                          |
| Mali                  | 2010 | 1 | 36,750,000 | CountrySTAT - Food and agriculture data network: Élevage - Total des effectifs d'animaux vivants. Online data: <a href="http://www.countrystat.org/home.aspx?c=MLI&amp;tr=21">http://www.countrystat.org/home.aspx?c=MLI&amp;tr=21</a>                                                                                                                                                         |
| Mozambique            | 2002 | 2 | 22,636,314 | Direccao Nacional de Pecuaria, Mozambique: Annual Reports, 2003 (GLIMS data warehouse)                                                                                                                                                                                                                                                                                                         |
| Namibia               | 2001 | 1 | 458,010    | Department of Veterinary Services, Namibia: FAO Special Report, FAO/WFP Crop, Livestock and Food Security Assessment Mission to Namibia (GLIMS data warehouse)                                                                                                                                                                                                                                 |
| Niger                 | 2007 | 1 | 6,674,216  | Ministère des Ressources Animales: Recensement Général de l'Agriculture et du Cheptel (RGAC 2005/2007). Online data: <a href="http://harvestchoice.org/publications/niger-recensement-general-de-lagriculture-et-du-cheptel-rgac-20052007-volume-v-producti">http://harvestchoice.org/publications/niger-recensement-general-de-lagriculture-et-du-cheptel-rgac-20052007-volume-v-producti</a> |
| Nigeria               | 2006 | 1 | 52,383,612 | National Bureau of Statistics, Federal Ministry of Agriculture and Rural Development: Estimated Subsistence Poultry Population by State (2006 estimates) (GLIMS data warehouse)                                                                                                                                                                                                                |
| Rwanda                | 2008 | 1 | 2,894,972  | Ministère de l'Agriculture et de l'élevage: FAO, Revue du secteur agricole: RWANDA 2008 (GLIMS data warehouse)                                                                                                                                                                                                                                                                                 |
| Réunion               | 2000 | 1 | 1,277,621  | Agreste la Statistique Agricole, Le Ministère de l'Agriculture, de l'Alimentation, de la Pêche et de la Ruralité, France: Recensement Agricole 2000. Online data: <a href="http://agriculture.gouv.fr/recensement-agricole-2010">http://agriculture.gouv.fr/recensement-agricole-2010</a>                                                                                                      |
| Saint Helena          | 2009 | 1 | 4,421      | Agriculture and Natural Resources Department of St. Helena: Livestock Census 2009 (GLIMS data warehouse)                                                                                                                                                                                                                                                                                       |
| Sao Tome and Principe | 1997 | 2 | 37,608     | Ministère de l'Agriculture et de la Pêche: Enquête Agricole de Production, EAP 1997 (GLIMS data warehouse)                                                                                                                                                                                                                                                                                     |
| Senegal               | 2009 | 2 | 22,301,806 | Agence Nationale de la Statistique et de la Démographie du Sénégal: Live Data Base (LDB). Online data: <a href="http://www.ansd.sn/publications_SES_region.html">http://www.ansd.sn/publications_SES_region.html</a>                                                                                                                                                                           |

|                             |      |   |            |                                                                                                                                        |
|-----------------------------|------|---|------------|----------------------------------------------------------------------------------------------------------------------------------------|
| Sierra Leone                | 2004 | 2 | 3,227,252  | Ministry of Agriculture & Food Security of Sierra Leone: 2004 Populations and Housing Census Statistical Office (GLIMS data warehouse) |
| Somalia                     | 2002 | 1 | 3,299,999  | Environmental Research Group Oxford, ERGO: Agro-ecological distributions for Africa (GLIMS data warehouse)                             |
| South Africa                | 2002 | 1 | 45,400,346 | Directorate Veterinary Services, South Africa: Animal Disease Report, January to September 2003 (GLIMS data warehouse)                 |
| Sudan                       | 2005 | 2 | 35,024,922 | Ministry of Animal Resources: Estimates supplied by veterinary staff at Ministry of Animal Resources for 2005 (GLIMS data warehouse)   |
| Swaziland                   | 2010 | 1 | 1,936,344  | Directorate of Veterinary and Livestock Services: Swaziland Livestock Statistics, Census 2010 (GLIMS data warehouse)                   |
| Uganda                      | 2000 | 4 | 12,759,176 | Uganda Bureau of Statistics: Uganda census 2000 - Data acquired from W. Wint (GLIMS data warehouse)                                    |
| United Republic of Tanzania | 2009 | 2 | 26,839,376 | CountrySTAT - Food and agriculture data network (GLIMS data warehouse)                                                                 |
| Zambia                      | 2008 | 1 | 10,421,085 | Department of Research and Specialist Services, Zambia: National Livestock Census by Province 1994 to 2009 (GLIMS data warehouse)      |

---

No Data for: Algeria, Bassas da India, British Indian Ocean Territory, Congo, Djibouti, Equatorial Guinea, Eritrea, Europa Island, Glorioso Island, Juan de Nova Island, Liberia, Libya, Mauritania, Mauritius, Mayotte, Morocco, Seychelles, Togo, Tromelin Island, Tunisia, Western Sahara, Zimbabwe

## Asia Tile

| COUNTRY     | YEAR | LEVEL | Totals in GLIMS | SOURCE                                                                                                                                                                                                                                                                                                                                                                               |
|-------------|------|-------|-----------------|--------------------------------------------------------------------------------------------------------------------------------------------------------------------------------------------------------------------------------------------------------------------------------------------------------------------------------------------------------------------------------------|
| Afghanistan | 2003 | 2     | 12,136,388      | Ministry of Agriculture, Irrigation and Livestock of Afghanistan: Afghanistan - National Livestock Census 2002-2003 - Final Report. Online data: <a href="http://reliefweb.int/sites/reliefweb.int/files/resources/58C374339FC582F149256DF30009D60F-fao-afg-4dec.pdf">http://reliefweb.int/sites/reliefweb.int/files/resources/58C374339FC582F149256DF30009D60F-fao-afg-4dec.pdf</a> |
| Bangladesh  | 2005 | 6     | 197,456,543     | Bangladesh Bureau of Statistics: Data Retrieved 12 November 2009 from <a href="http://www.bbs.gov.bd/">http://www.bbs.gov.bd/</a> (GLIMS data warehouse)                                                                                                                                                                                                                             |
| Belarus     | 2011 | 1     | 36,410,987      | National Statistical Committee of the Republic of Belarus: Agriculture of the Republic of Belarus, 2011 (GLIMS data warehouse)                                                                                                                                                                                                                                                       |
| Bhutan      | 2008 | 1     | 198,148         | National Statistics Bureau, Bhutan: Annual district statistics 2010 (GLIMS data warehouse)                                                                                                                                                                                                                                                                                           |
| Cambodia    | 2009 | 2     | 15,103,537      | Department of Animal Production and Health, Cambodia: 2009 district data (David Bourn, "Environmental Animal Health Management Initiative for Enhanced Smallholder Production", 2010) (GLIMS data warehouse)                                                                                                                                                                         |
| China       | 2005 | 6     | 5,012,700,208   | Editorial Department of China Animal Husbandry: China animal husbandry yearbook. Beijing, China: China Agricultural Press (GLIMS data warehouse)                                                                                                                                                                                                                                     |
| Georgia     | 2004 | 2     | 7,960,916       | National Statistics Office of Georgia: First National Agricultural Census 2004 in Georgia. Online data: <a href="http://geostat.ge/cms/site_images/_files/english/agriculture/census/section7.pdf">http://geostat.ge/cms/site_images/_files/english/agriculture/census/section7.pdf</a>                                                                                              |
| India       | 2007 | 2     | 606,978,885     | Department of Animal Husbandry, Dairying & Fisheries, Ministry of Agriculture, India: Census of Agriculture, 2007 (GLIMS data warehouse)                                                                                                                                                                                                                                             |
| Indonesia   | 2010 | 1     | 1,349,625,877   | Department Pertanian Republik Indonesia: Buku Statistik, 2011 (GLIMS data warehouse)                                                                                                                                                                                                                                                                                                 |
| Japan       | 2009 | 1     | 285,349,000     | Statistics Department, Minister's Secretariat, Ministry of Agriculture, Forestry and Fisheries: Japan Statistical Yearbook 2010. Online data: <a href="http://www.maff.go.jp/e/tokei/kikaku/nenji_e/85nenji/index.html">http://www.maff.go.jp/e/tokei/kikaku/nenji_e/85nenji/index.html</a>                                                                                          |
| Jordan      | 2007 | 1     | 172,052         | Department of Statistics, Jordan: The Agricultural Census 2007 (GLIMS data warehouse)                                                                                                                                                                                                                                                                                                |
| Kazakhstan  | 2004 | 1     | 25,480,500      | Agency on Statistics of the Republic of Kazakhstan: Main socio economic indicators of regions in Kazakhstan 2005. Almaty, Kazakhstan (GLIMS data warehouse)                                                                                                                                                                                                                          |
| Kuwait      | 2000 | 1     | 26,314,863      | Central Statistical Office and Public Authority for Agriculture and Fisheries: Annual Statistical Abstract 2000 (GLIMS data warehouse)                                                                                                                                                                                                                                               |
| Kyrgyzstan  | 2003 | 1     | 3,585,842       | National Statistic Committee of Kyrgyzstan: Results of the first agricultural census of the Kyrgyz Republic of 2003 (Second Stage) (GLIMS data warehouse)                                                                                                                                                                                                                            |

|                                  |      |   |             |                                                                                                                                                                                                                                                                                                        |
|----------------------------------|------|---|-------------|--------------------------------------------------------------------------------------------------------------------------------------------------------------------------------------------------------------------------------------------------------------------------------------------------------|
| Lao People's Democratic Republic | 2009 | 2 | 16,047,773  | Department of Livestock and Fisheries, Laos: 2009 district data (David Bourn, " Environmental Animal Health Management Initiative for Enhanced Smallholder Production" , 2010) (GLIMS data warehouse)                                                                                                  |
| Lebanon                          | 1997 | 2 | 12,053,000  | United Nations, Economic and Social Commission for Western Asia, 1999: National farm data handbook for Lebanon. New York (GLIMS data warehouse)                                                                                                                                                        |
| Malaysia                         | 2001 | 1 | 119,980,226 | Department of Veterinary Service, Malaysia: Livestock Products statistics 1996-2002 (GLIMS data warehouse)                                                                                                                                                                                             |
| Myanmar                          | 2006 | 6 | 82,154,065  | Livestock Breeding and Veterinary Department (LBVD), Ministry of Livestock Breeding and Fisheries, Yangon, Myanmar: Myanmar Animal Census 2006 (GLIMS data warehouse)                                                                                                                                  |
| Nepal                            | 2009 | 3 | 24,333,826  | Ministry of Agriculture and Cooperatives (MOAC), Nepal: 2009 data (GLIMS data warehouse)                                                                                                                                                                                                               |
| Pakistan                         | 1996 | 2 | 59,253,879  | Agricultural Census Organization, Ministry of Food & Agriculture, Pakistan: Livestock census 1996 - special report. Lahore, Pakistan (GLIMS data warehouse)                                                                                                                                            |
| Philippines                      | 2006 | 3 | 135,912,594 | Bureau of Animal Industry, Philippines: 2006 data (David Bourn, " Environmental Animal Health Management Initiative for Enhanced Smallholder Production" , 2010) (GLIMS data warehouse)                                                                                                                |
| Republic of Korea                | 2004 | 1 | 109,627,646 | Korea National Statistical Office: Korea Statistical Yearbook 2005 (GLIMS data warehouse)                                                                                                                                                                                                              |
| Romania                          | 2002 | 6 | 69,583,725  | EUROSTAT on line database. Section: General Statistics, Region, Agriculture, Animal Populations and Land Use. February 2005. Online data:<br><a href="http://epp.eurostat.ec.europa.eu/portal/page/portal/agriculture/data/">http://epp.eurostat.ec.europa.eu/portal/page/portal/agriculture/data/</a> |
| Russian Federation               | 2006 | 1 | 216,620,630 | Russian Federation - Federal State Statistical Service: Results of All-Russia Agricultural Census 2006 (1-8 vol.) (GLIMS data warehouse)                                                                                                                                                               |
| Saudi Arabia                     | 2006 | 1 | 531,875,811 | FAO Animal Production and Health Division: Saudi Arabia Poultry Sector Country Review (GLIMS data warehouse)                                                                                                                                                                                           |
| Sri Lanka                        | 2002 | 2 | 15,617,153  | Agriculture and Environment Statistics Division, Department of Census and Statistics, Sri Lanka: Census of Agriculture 2002, All Sectors. Online data:<br><a href="http://www.statistics.gov.lk/agriculture/AGC2002/AGC2002.htm">http://www.statistics.gov.lk/agriculture/AGC2002/AGC2002.htm</a>      |
| Syrian Arab Republic             | 2005 | 1 | 28,502,000  | FAO Animal Production and Health Division, Emergency Centre for Transboundary Animal Diseases, Socio Economics, Production and Biodiversity Unit, 2008. Poultry sector country review: Syria (GLIMS data warehouse)                                                                                    |
| Tajikistan                       | 2000 | 1 | 1,061,500   | Government Statistic Committee of the Republic of Tajikistan: Agricultural Yearbook of the Republic of Tajikistan (GLIMS data warehouse)                                                                                                                                                               |
| Thailand                         | 2004 | 3 | 191,375,293 | Department of Livestock Development, Ministry of Agriculture and Cooperatives, Thailand: Census 2004 (X- ray surveys searching for HPAI outbreaks) (GLIMS data warehouse)                                                                                                                              |
| Turkey                           | 2009 | 2 | 230,105,873 | Turkish Statistical Institute: Livestock statistics database 2009 (GLIMS data warehouse)                                                                                                                                                                                                               |
| Ukraine                          | 2009 | 1 | 159,218,996 | State Statistics Committee Ukraine: Head of livestock and poultry by regions (GLIMS data warehouse)                                                                                                                                                                                                    |

Viet Nam                      2001                      6                      148,078,344      General Statistics Office of Vietnam: Agricultural Census database 2001. Online data:  
[http://www.gso.gov.vn/default\\_en.aspx?tabid=477&idmid=4&ItemID=1824](http://www.gso.gov.vn/default_en.aspx?tabid=477&idmid=4&ItemID=1824)

---

No Data for: Armenia, Azerbaijan, Bahrain, Brunei Darussalam, Bulgaria, Christmas Island, Cocos (Keeling) Islands, Cyprus, Democratic People's Republic of Korea, Islamic Republic of Iran, Iraq, Israel, Kuril Islands, Liancourt Rock, Maldives, Mongolia, Oman, Paracel Islands, Qatar, Republic of Moldova, Scarborough Reef, Senkaku Islands, Singapore, Spratly Islands, Timor-Leste, Turkmenistan, United Arab Emirates, Uzbekistan, Yemen

## Europe Tile

| COUNTRY        | YEAR | LEVEL | Totals in GLIMS | SOURCE                                                                                                                                                                                                                                                                                                             |
|----------------|------|-------|-----------------|--------------------------------------------------------------------------------------------------------------------------------------------------------------------------------------------------------------------------------------------------------------------------------------------------------------------|
| Albania        | 2010 | 1     | 5,244,500       | Institute of Statics, Albania: Agricultural sector, Livestock 2001-2010 (GLIMS data warehouse)                                                                                                                                                                                                                     |
| Austria        | 2003 | 1     | 12,571,600      | EUROSTAT online database. General Statistics, Region, Agriculture, Animal Populations and Land Use. Online data: <a href="http://epp.eurostat.ec.europa.eu/portal/page/portal/agriculture/data/">http://epp.eurostat.ec.europa.eu/portal/page/portal/agriculture/data/</a>                                         |
| Belgium        | 2003 | 2     | 32,032,000      | EUROSTAT online database. General Statistics, Region, Agriculture, Animal Populations and Land Use. Online data: <a href="http://epp.eurostat.ec.europa.eu/portal/page/portal/agriculture/data/">http://epp.eurostat.ec.europa.eu/portal/page/portal/agriculture/data/</a>                                         |
| Croatia        | 2003 | 1     | 10,477,514      | Central Bureau of Statistics, Republic of Croatia: Agricultural Census 2003. Online data: <a href="http://www.dzs.hr/default_e.htm">http://www.dzs.hr/default_e.htm</a>                                                                                                                                            |
| Czech Republic | 2010 | 2     | 16,843,696      | Czech Statistical Office: Agrocensus regions: Farm Structure Survey and Survey on Agricultural Production Methods 2010. Online data: <a href="http://www.czso.cz/csu/2012edicniplan.nsf/engp/2127-12">http://www.czso.cz/csu/2012edicniplan.nsf/engp/2127-12</a>                                                   |
| Denmark        | 2010 | 2     | 18,083,961      | Denmark Statistics: Farms by region and selected farms, crops and livestock. Online data: <a href="http://www.statistikbanken.dk/statbank5a/SelectVarVal/Define.asp?Maintable=BDF51&amp;PLanguage=1">http://www.statistikbanken.dk/statbank5a/SelectVarVal/Define.asp?Maintable=BDF51&amp;PLanguage=1</a>          |
| Estonia        | 2001 | 2     | 1,611,794       | Statistikaamet Statistical Office of Estonia: Agricultural Census 2001. Online data: <a href="http://www.stat.ee/agricultural-census-2001">http://www.stat.ee/agricultural-census-2001</a>                                                                                                                         |
| Finland        | 2010 | 6     | 7,828,600       | The Information Centre of the Ministry of Agriculture and Forestry, Finland: Yearbook of Farm Statistics 2011 (GLIMS data warehouse)                                                                                                                                                                               |
| France         | 2001 | 2     | 205,617,000     | Agreste la Statistique Agricole, Le Ministère de l'Agriculture, de l'Alimentation, de la Pêche et de la Ruralité: Agreste la Statistique Agricole, 2002 (GLIMS data warehouse)                                                                                                                                     |
| Germany        | 2001 | 1     | 109,993,100     | Federal Statistical Office, Germany: Statistical Yearbook 2003 for the Federal Republic of Germany (GLIMS data warehouse)                                                                                                                                                                                          |
| Greece         | 2007 | 2     | 33,495,026      | Hellenic Statistic Authority (EL.STAT): Farms and number of animals by type, region and county (GLIMS data warehouse)                                                                                                                                                                                              |
| Hungary        | 2010 | 1     | 31,849,000      | Hungarian Central Statistical Office: Regional Statistics. Online data: <a href="http://www.ksh.hu/agriculture">http://www.ksh.hu/agriculture</a>                                                                                                                                                                  |
| Iceland        | 2010 | 2     | 323,427         | Statistics Iceland: 2010 data (GLIMS data warehouse)                                                                                                                                                                                                                                                               |
| Ireland        | 2000 | 1     | 12,724,881      | Central Statistical Office Ireland: Census of Agriculture 2000. Online data: <a href="http://www.cso.ie/en/releasesandpublications/agricultureandfishing/censusoofagriculturemainresultsjune2000/">http://www.cso.ie/en/releasesandpublications/agricultureandfishing/censusoofagriculturemainresultsjune2000/</a> |
| Italy          | 2010 | 3     | 139,031,114     | Istituto Nazionale di Statistica: Censimento Agricoltura 2010. Online data: <a href="http://dati-censimentoagricoltura.istat.it">http://dati-censimentoagricoltura.istat.it</a>                                                                                                                                    |
| Latvia         | 2001 | 1     | 3,470,101       | Central Statistical Bureau of Latvia: Results of 2001 Agricultural Census. Online data: <a href="http://www.csb.gov.lv/en/dati/agricultural-census-2001-30765.html">http://www.csb.gov.lv/en/dati/agricultural-census-2001-30765.html</a>                                                                          |
| Liechtenstein  | 2009 | 6     | 12,000          | Amt für Statistik Liechtenstein: Landwirtschaftsstatistik 2009 (GLIMS data warehouse)                                                                                                                                                                                                                              |

|                                           |      |   |             |                                                                                                                                                                                                                                                                                          |
|-------------------------------------------|------|---|-------------|------------------------------------------------------------------------------------------------------------------------------------------------------------------------------------------------------------------------------------------------------------------------------------------|
| Lithuania                                 | 2010 | 2 | 9,465,819   | Lietuvos Statistikos Departamenta: Number of livestock by administrative territory, 2011 (GLIMS data warehouse)                                                                                                                                                                          |
| Luxembourg                                | 2008 | 2 | 100,787     | Portail des statistiques du Grand-Duché de Luxembourg (STATEC): Recensement Agricole, 2008 (GLIMS data warehouse)                                                                                                                                                                        |
| Malta                                     | 2010 | 6 | 1,146,810   | National Statistics Office of Malta: Census of Agriculture 2010. Online data: <a href="http://www.nso.gov.mt/statdoc/document_view.aspx?id=3287&amp;backurl=/themes/theme_page.aspx">http://www.nso.gov.mt/statdoc/document_view.aspx?id=3287&amp;backurl=/themes/theme_page.aspx</a>    |
| Montenegro                                | 2010 | 1 | 411,083     | Statistical office of Montenegro (MONSTAT): Agriculture Census 2010. Online data: <a href="http://www.monstat.org/eng/page.php?id=58&amp;pageid=58">http://www.monstat.org/eng/page.php?id=58&amp;pageid=58</a>                                                                          |
| Netherlands                               | 2010 | 2 | 101,247,711 | Centraal Bureau voor de Statistiek, Netherlands: Agriculture: crops, livestock and land use by general far type, region - 2011 (GLIMS data warehouse)                                                                                                                                    |
| Norway                                    | 2002 | 1 | 3,137,661   | Statistics Norway: Statistical Yearbook 2003 (GLIMS data warehouse)                                                                                                                                                                                                                      |
| Poland                                    | 2009 | 1 | 124,129,100 | Central Statistical Office, Poland: Statistical Yearbook of Agriculture 2010 (GLIMS data warehouse)                                                                                                                                                                                      |
| Portugal                                  | 2009 | 2 | 34,368,861  | Instituto Nacional de Estatística - Statistics Portugal: Agricultural Census 2009. Online data: <a href="http://ra09.ine.pt/xportal/xmain?xpid=RA2009&amp;xpgid=ra_home">http://ra09.ine.pt/xportal/xmain?xpid=RA2009&amp;xpgid=ra_home</a>                                              |
| Serbia                                    | 2006 | 1 | 16,595,204  | Statistical Office of Serbia: Municipalities of Serbia 2007 (GLIMS data warehouse)                                                                                                                                                                                                       |
| Slovakia                                  | 2009 | 2 | 13,104,090  | Statistical Office of the Slovak Republic: Livestock by territory, products and period. Online data: <a href="http://px-web.statistics.sk/PXWebSlovak/DATABASE/En/databasetree.asp">http://px-web.statistics.sk/PXWebSlovak/DATABASE/En/databasetree.asp</a>                             |
| Slovenia                                  | 2010 | 1 | 4,005,852   | Statistical Office of the Republic of Slovenia: Agricultural Census Slovenia 2010. Online data: <a href="http://www.stat.si/eng/novica_prikazi.aspx?id=4594">http://www.stat.si/eng/novica_prikazi.aspx?id=4594</a>                                                                      |
| Spain                                     | 2009 | 2 | 178,328,136 | Instituto Nacional de Estadística, Spain: Agrarian Census 2009. Online data: <a href="http://www.ine.es/jaxi/menu.do?type=pcaxis&amp;path=%2Ft01%2Fp042/E01&amp;file=inebase&amp;L=1">http://www.ine.es/jaxi/menu.do?type=pcaxis&amp;path=%2Ft01%2Fp042/E01&amp;file=inebase&amp;L=1</a> |
| Sweden                                    | 2009 | 1 | 7,158,272   | Statistics Sweden: Yearbook of Agricultural Statistics 2010 (GLIMS data warehouse)                                                                                                                                                                                                       |
| Switzerland                               | 2009 | 1 | 8,741,117   | Swiss Federal Statistical Office: Recensement des entreprises agricoles,1999-2009 (GLIMS data warehouse)                                                                                                                                                                                 |
| The former Yugoslav Republic of Macedonia | 2008 | 1 | 2,226,055   | State Statistic Office of the Republic of Macedonia: Total number of livestock, poultry and bee-hives (2007 and 2008) (GLIMS data warehouse)                                                                                                                                             |
| United Kingdom                            | 2009 | 2 | 131,354,251 | Office for National Statistics, U.K.: Statistics by Region. Online data: <a href="http://www.statistics.gov.uk/hub/regional-statistics/">http://www.statistics.gov.uk/hub/regional-statistics/</a>                                                                                       |

No Data for: Andorra, Bosnia and Herzegovina, Faroe Islands, Gibraltar, Guernsey, Holy See, Isle of Man, Jersey, Madeira Islands, Monaco, San Marino, Svalbard and Jan Mayen Islands

## North America Tile

| COUNTRY                          | YEAR | LEVEL | Totals in GLIMS | SOURCE                                                                                                                                                                                                                                                                                                                                                                                               |
|----------------------------------|------|-------|-----------------|------------------------------------------------------------------------------------------------------------------------------------------------------------------------------------------------------------------------------------------------------------------------------------------------------------------------------------------------------------------------------------------------------|
| Belize                           | 2002 | 1     | 1,764,435       | Ministry Of Agriculture, Fisheries and Cooperatives, Belize: Annual Report 2002. Online data: <a href="http://www.agriculture.gov.bz/PDF/2002_annual_report.pdf">http://www.agriculture.gov.bz/PDF/2002_annual_report.pdf</a>                                                                                                                                                                        |
| Canada                           | 2006 | 2     | 118,641,120     | Statistics Canada: 2006 Census of Agriculture. Online data: <a href="http://www.statcan.gc.ca/ca-ra2006/index-eng.htm">http://www.statcan.gc.ca/ca-ra2006/index-eng.htm</a>                                                                                                                                                                                                                          |
| El Salvador                      | 2007 | 2     | 35,123,656      | Ministerio de Economía - El Salvador: IV Censo Agropecuario 2007-2008 (GLIMS data warehouse)                                                                                                                                                                                                                                                                                                         |
| Guatemala                        | 2003 | 2     | 21,518,212      | Instituto Nacional de Estadística, Guatemala: IV Censo Nacional Agropecuario 2003. Online data: <a href="http://www.ine.gob.gt/np/agropecuario/tomo%20IV.pdf">http://www.ine.gob.gt/np/agropecuario/tomo%20IV.pdf</a>                                                                                                                                                                                |
| Jamaica                          | 2009 | 1     | 11,026,836      | Agricultural Business Information System, Jamaica: Livestock Summary Report, 2009 (GLIMS data warehouse)                                                                                                                                                                                                                                                                                             |
| Martinique                       | 2000 | 1     | 407,811         | Agreste la Statistique Agricole, Le Ministère de l'Agriculture, de l'Alimentation, de la Pêche et de la Ruralité, France: Recensement Agricole 2000. Online data: <a href="http://agreste.agriculture.gouv.fr/recensement-agricole-2010/resultats-donnees-chiffrees/">http://agreste.agriculture.gouv.fr/recensement-agricole-2010/resultats-donnees-chiffrees/</a>                                  |
| Mexico                           | 2007 | 2     | 154,126,180     | Instituto Nacional de Estadística Geografía e Informática, México: Censo Agrícola, Ganadero y Forestal 2007. Online data: <a href="http://www.inegi.org.mx/est/contenidos/proyectos/Agro/ca2007/Resultados_Agricola/default.aspx">http://www.inegi.org.mx/est/contenidos/proyectos/Agro/ca2007/Resultados_Agricola/default.aspx</a>                                                                  |
| Nicaragua                        | 2001 | 2     | 8,422,682       | Instituto Nacional de Estadística y Censos, Nicaragua: III Censo Nacional Agropecuario 2001 (GLIMS data warehouse)                                                                                                                                                                                                                                                                                   |
| Panama                           | 2001 | 2     | 14,082,185      | Instituto Nacional de Estadística y Censo: Existencia de Animales en la República, por clase de animal, según provincia: 21 de abril de 1991 al 22 abril de 2001. Online data: <a href="http://www.contraloria.gob.pa/inec/Avance/Avance.aspx?ID_CATEGORIA=2&amp;ID_CIFRAS=8&amp;ID_DIOMA=1">http://www.contraloria.gob.pa/inec/Avance/Avance.aspx?ID_CATEGORIA=2&amp;ID_CIFRAS=8&amp;ID_DIOMA=1</a> |
| Puerto Rico                      | 2007 | 2     | 5,031,810       | National Agricultural Statistics Service - United States Department of Agriculture: National Agricultural Census 2007. Online data: <a href="http://www.agcensus.usda.gov/Publications/2007/Full_Report/">http://www.agcensus.usda.gov/Publications/2007/Full_Report/</a>                                                                                                                            |
| Saint Lucia                      | 2007 | 6     | 129,861         | Ministry of Agriculture, Forestry and Fisheries: Census of Agriculture - Final report 2007. Online data: <a href="http://www.govt.lc/www/publications/AgricultureCensus2007.pdf">http://www.govt.lc/www/publications/AgricultureCensus2007.pdf</a>                                                                                                                                                   |
| Saint Vincent and the Grenadines | 2000 | 1     | 65,920          | Ministry of Agriculture and Labour, Government of Saint Vincent and the Grenadines: National Agricultural Census 2000 (GLIMS data warehouse)                                                                                                                                                                                                                                                         |
| United States of America         | 2007 | 2     | 1,692,431,565   | National Agricultural Statistics Service - United States Department of Agriculture: National Agricultural Census 2007. Online data: <a href="http://www.agcensus.usda.gov/Publications/2007/Full_Report/">http://www.agcensus.usda.gov/Publications/2007/Full_Report/</a>                                                                                                                            |

No Data for: Anguilla, Antigua and Barbuda, Bahamas, Barbados, Bermuda, Bird Island, British Virgin Islands, Cayman Islands, Costa Rica, Cuba, Dominica, Dominican Republic, Grenada, Guadeloupe, Haiti, Honduras, Montserrat, Netherlands Antilles, Saint Kitts and Nevis, Turks and Caicos Islands, United States Virgin Islands



## South America Tile

| COUNTRY                               | YEAR | LEVEL | Totals in GLIMS | SOURCE                                                                                                                                                                                                                                                                                                                              |
|---------------------------------------|------|-------|-----------------|-------------------------------------------------------------------------------------------------------------------------------------------------------------------------------------------------------------------------------------------------------------------------------------------------------------------------------------|
| Argentina                             | 2002 | 2     | 244,131,110     | Instituto Nacional de Estadística y Censos. Argentina: Censo Nacional Agropecuario 2002 (CNA 2002).<br>Online data: <a href="http://www.indec.gov.ar/agropecuario/cna_principal.asp">http://www.indec.gov.ar/agropecuario/cna_principal.asp</a>                                                                                     |
| Bolivia,<br>Plurinational State<br>of | 2009 | 1     | 161,268,733     | Instituto Nacional de Estadística, Bolivia: Existencia Total de Aves Parrilleras por Año, Según Departamento 2000-2009 (GLIMS data warehouse)                                                                                                                                                                                       |
| Brazil                                | 2009 | 2     | 1,024,999,717   | Istituto Brasileiro de Geografia e Estatística: Produção da Pecuária Municipal 2009. Online data:<br><a href="http://www.ibge.gov.br/home/estatistica/economia/ppm/2009/default.shtm">http://www.ibge.gov.br/home/estatistica/economia/ppm/2009/default.shtm</a>                                                                    |
| Chile                                 | 2007 | 1     | 40,362,000      | Instituto Nacional de Estadísticas, Chile: Censo Agropecuario y Forestal 2007. Online data:<br><a href="http://www.ine.cl/canales/chile_estadistico/censos_agropecuarios/censo_agropecuario_07_comunas.php">http://www.ine.cl/canales/chile_estadistico/censos_agropecuarios/censo_agropecuario_07_comunas.php</a>                  |
| Colombia                              | 2009 | 1     | 144,913,543     | Instituto Agropecuario, Colombia: Censo Agropecuario Nacional 2004 - 2009 (GLIMS data warehouse)                                                                                                                                                                                                                                    |
| Ecuador                               | 2000 | 2     | 40,823,593      | Project SICA, Agricultural Information System, Ministry of Agriculture and Livestock, Ecuador: III Censo Nacional Agropecuario (GLIMS data warehouse)                                                                                                                                                                               |
| French Guiana                         | 1994 | 6     | 398,988         | Institut National de la Statistique et des Etudes Economiques (INSEE): Tableaux Economiques Régionaux. Guyane 1995. Online data: <a href="http://www.insee.fr/fr/regions/guyane/collection.asp?id=76">http://www.insee.fr/fr/regions/guyane/collection.asp?id=76</a>                                                                |
| Paraguay                              | 2008 | 2     | 16,055,854      | Ministerio de Agricultura y Ganadería, Paraguay: Censo Agropecuario Nacional 2008 (GLIMS data warehouse)                                                                                                                                                                                                                            |
| Peru                                  | 2007 | 1     | 120,226,000     | Instituto Nacional de Estadística e Informática, Peru: Compendio Estadístico 2007 (GLIMS data warehouse)                                                                                                                                                                                                                            |
| Suriname                              | 1994 | 1     | 6,459,453       | Environmental Research Group Oxford, ERGO: ERGO, 1996 "Livestock Geography. A demonstration of GIS techniques applied to Global Livestock Systems and Populations", Animal Health Division, FAO, Rome (William Wint extracted from the agroecological zone estimates derived from the FAOSTAT data for 1994) (GLIMS data warehouse) |
| Uruguay                               | 2000 | 1     | 9,912,543       | Instituto Nacional de Estadística, República Oriental del Uruguay: Censo Agropecuario 2000 (GLIMS data warehouse)                                                                                                                                                                                                                   |
| Venezuela,<br>Bolivarian Republic     | 2007 | 1     | 91,417,167      | Ministerio del Poder Popular para la Agricultura y Tierras - Venezuela: VII Censo Agrícola 2007. Online data: <a href="http://censo.mat.gob.ve/">http://censo.mat.gob.ve/</a>                                                                                                                                                       |

No Data for: Aruba, Falkland Islands, Guyana, Trinidad and Tobago

## Oceania Tile

| COUNTRY                  | YEAR | LEVEL | Totals in GLIMS | SOURCE                                                                                                                                                                                                                                                                                                                                                                                     |
|--------------------------|------|-------|-----------------|--------------------------------------------------------------------------------------------------------------------------------------------------------------------------------------------------------------------------------------------------------------------------------------------------------------------------------------------------------------------------------------------|
| American Samoa           | 2003 | 1     | 35,709          | National Agricultural Statistics Service - United States Department of Agriculture: National Agricultural Census 2007. Online data: <a href="http://www.agcensus.usda.gov/Publications/2007/Full_Report/">http://www.agcensus.usda.gov/Publications/2007/Full_Report/</a>                                                                                                                  |
| Australia                | 2007 | 6     | 94,199,025      | Australian Bureau of Statistics: Agricultural commodities: small area data, Australia 2006-2007 (GLIMS data warehouse)                                                                                                                                                                                                                                                                     |
| Cook Islands             | 2006 | 1     | 30,611          | Statistic Office: Census of Population Dwellings (2001 and 2006) (GLIMS data warehouse)                                                                                                                                                                                                                                                                                                    |
| New Caledonia            | 2002 | 1     | 344,176         | Institut de la Statistique et des Etudes Economiques (ISEE): Recensement Général Agricole (RGA) 2002. Online data: <a href="http://www.davar.gouv.nc/portal/page/portal/davar/secteur_rural/statistiques_agricoles/donnees_synthese/recensement_agricole">http://www.davar.gouv.nc/portal/page/portal/davar/secteur_rural/statistiques_agricoles/donnees_synthese/recensement_agricole</a> |
| Northern Mariana Islands | 2007 | 1     | 11,812          | National Agricultural Statistics Service - United States Department of Agriculture: National Agricultural Census 2007. Online data: <a href="http://www.agcensus.usda.gov/Publications/2007/Full_Report/">http://www.agcensus.usda.gov/Publications/2007/Full_Report/</a>                                                                                                                  |
| Tonga                    | 2001 | 1     | 177,829         | Ministry of Agriculture and Forestry, Kingdom of Tonga: Agriculture Census 2001. Online data: <a href="http://www.spc.int/prism/tonga/index.php/surveys/agriculture-census-2011">http://www.spc.int/prism/tonga/index.php/surveys/agriculture-census-2011</a>                                                                                                                              |

No Data for: Ashmore and Cartier Islands, Fiji, French Polynesia, Guam, Kiribati, Marshall Islands, Federated States of Micronesia, Nauru, New Zealand, Niue, Norfolk Island, Palau, Papua New Guinea, Pitcairn, Samoa, Solomon Islands, Tokelau, Tuvalu, Vanuatu, Wake Island, Wallis and Futuna

Supplementary information 5d – Country details on sub-national statistics for ducks (year and level of observation) by continental tile.

**Africa Tile (Data insufficient to run the regional model)**

| COUNTRY               | YEAR | LEVEL | Totals in GLIMS | SOURCE                                                                                                                                                                                                                                                                                                                                                                                         |
|-----------------------|------|-------|-----------------|------------------------------------------------------------------------------------------------------------------------------------------------------------------------------------------------------------------------------------------------------------------------------------------------------------------------------------------------------------------------------------------------|
| Burkina Faso          | 2003 | 2     | 211,828         | Ministère des Ressources Animales: Les Statistiques du Secteur de l'Élevage au Burkina Faso, 2003 & 2008 (GLIMS data warehouse)                                                                                                                                                                                                                                                                |
| Cameroon              | 1999 | 1     | 194,579         | Direction des Etudes, de la Statistique et de la Coopération/MINEPIA (1999) et Institut National de la Statistique (1998): Revue du secteur avicole (GLIMS data warehouse)                                                                                                                                                                                                                     |
| Congo                 | 2000 | 1     | 1,023           | Ministère de l'Agriculture et de l'Élevage: Enquête Agricole Pilote, Campagne Agricole 1999-2000 (GLIMS data warehouse)                                                                                                                                                                                                                                                                        |
| Egypt                 | 2011 | 1     | 4,658,920       | Central Agency for Public Mobilization and Statistics, Egypt: Estimated numbers of livestock and animals by Governorate 2011 (GLIMS data warehouse)                                                                                                                                                                                                                                            |
| Ghana                 | 2009 | 1     | 330,045         | CountrySTAT - Food and agriculture data network (GLIMS data warehouse)                                                                                                                                                                                                                                                                                                                         |
| Guinea                | 2001 | 1     | 387,482         | Service National des Statistiques Agricoles - Ministère de l'Agriculture, de l'Élevage et des Forêts: Recensement national de l'agriculture, Campagne agricole 2000-2001 (GLIMS data warehouse)                                                                                                                                                                                                |
| Guinea-Bissau         | 1994 | 2     | 42,988          | Instituto Nacional de Estadística: Inquérito Anual sobre Superficie Rendimento e Producao. Campanha 93/94 (GLIMS data warehouse)                                                                                                                                                                                                                                                               |
| Madagascar            | 2005 | 2     | 24,213,521      | Ministère de l'Agriculture, Secrétariat General, Direction de la Prévision et des Etudes Economiques, Madagascar: Recensement de l'agriculture (RA) - Campagne agricole 2004-2005 (GLIMS data warehouse)                                                                                                                                                                                       |
| Malawi                | 2007 | 2     | 429,170         | Agriculture Statistics Division of the National Statistical Office of Malawi: National Census of Agriculture and Livestock (October 2006 - October 2007) (GLIMS data warehouse)                                                                                                                                                                                                                |
| Mali                  | 2004 | 1     | 161,269         | Ministère de l'Agriculture de l'Élevage et de la Pêche, République du Mali: Recensement de l'Agriculture 2004-2005 (GLIMS data warehouse)                                                                                                                                                                                                                                                      |
| Mozambique            | 2010 | 1     | 1,881,736       | National Directorate of Livestock: Censo AgroPecuario 2009-2010 (GLIMS data warehouse)                                                                                                                                                                                                                                                                                                         |
| Niger                 | 2007 | 1     | 427,747         | Ministère des Ressources Animales: Recensement Général de l'Agriculture et du Cheptel (RGAC 2005/2007). Online data: <a href="http://harvestchoice.org/publications/niger-recensement-general-de-lagriculture-et-du-cheptel-rgac-20052007-volume-v-producti">http://harvestchoice.org/publications/niger-recensement-general-de-lagriculture-et-du-cheptel-rgac-20052007-volume-v-producti</a> |
| Nigeria               | 2011 | 1     | 9,553,912       | National Bureau of Statistics, Federal Ministry of Agriculture and Rural Development: National Agriculture Sample Survey 2010/2011 (GLIMS data warehouse)                                                                                                                                                                                                                                      |
| Rwanda                | 2008 | 1     | 6,729           | Rwanda Animal Resources Development Authority (RARDA) (GLIMS data warehouse)                                                                                                                                                                                                                                                                                                                   |
| Sao Tome and Principe | 1997 | 2     | 8,713           | Ministère de l'Agriculture et de la Pêche: Enquête Agricole de Production (EAP) 1997 (GLIMS data warehouse)                                                                                                                                                                                                                                                                                    |

|                             |      |   |           |                                                                                                                                                                                                                                             |
|-----------------------------|------|---|-----------|---------------------------------------------------------------------------------------------------------------------------------------------------------------------------------------------------------------------------------------------|
| Sierra Leone                | 2004 | 2 | 487,508   | Ministry of Agriculture & Food Security of Sierra Leone: 2004 Populations and Housing Census Statistical Office (GLIMS data warehouse)                                                                                                      |
| Togo                        | 2005 | 1 | 13,200    | Division de la Production et de la Santé Animales de la FAO, Centre d'Urgence pour les Maladies Animales Transfrontaliers, Unité de Socio-Économie, Production et Biodiversité. Revue du secteur avicole: Togo, 2008 (GLIMS data warehouse) |
| Uganda                      | 2000 | 4 | 671,813   | Uganda Bureau of Statistics: Uganda Census 2000 (GLIMS data warehouse)                                                                                                                                                                      |
| United Republic of Tanzania | 2008 | 2 | 1,156,726 | Ministry of Water and Livestock Development of Tanzania: National Sample Census of Agriculture, 2007/2008 (GLIMS data warehouse)                                                                                                            |

---

No Data for: Algeria, Angola, Bassas da India, Benin, Botswana, British Indian Ocean Territory, Burundi, Côte d'Ivoire, Cape Verde, Central African Republic, Chad, Comoros, Democratic Republic of the Congo, Djibouti, Equatorial Guinea, Eritrea, Ethiopia, Europa Island, Gabon, Gambia, Glorioso Island, Juan de Nova Island, Kenya, Lesotho, Liberia, Libya, Mauritania, Mauritius, Mayotte, Morocco, Namibia, Réunion, Saint Helena, Senegal, Seychelles, Somalia, South Africa, Sudan, Swaziland, Tromelin Island, Tunisia, Western Sahara, Zambia, Zimbabwe

## Asia Tile

| COUNTRY                          | YEAR | LEVEL | Totals in GLIMS | SOURCE                                                                                                                                                                                                                                                                                                                                                                               |
|----------------------------------|------|-------|-----------------|--------------------------------------------------------------------------------------------------------------------------------------------------------------------------------------------------------------------------------------------------------------------------------------------------------------------------------------------------------------------------------------|
| Afghanistan                      | 2003 | 2     | 387,038         | Ministry of Agriculture, Irrigation and Livestock of Afghanistan: Afghanistan - National Livestock Census 2002-2003 - Final Report. Online data: <a href="http://reliefweb.int/sites/reliefweb.int/files/resources/58C374339FC582F149256DF30009D60F-fao-afg-4dec.pdf">http://reliefweb.int/sites/reliefweb.int/files/resources/58C374339FC582F149256DF30009D60F-fao-afg-4dec.pdf</a> |
| Bangladesh                       | 2005 | 6     | 37,932,995      | Bangladesh Bureau of Statistics: Data Retrieved 12 November 2009 from <a href="http://www.bbs.gov.bd/">http://www.bbs.gov.bd/</a> (GLIMS data warehouse)                                                                                                                                                                                                                             |
| Belarus                          | 2005 | 1     | 1,017,938       | Ministry of Statistics and Analysis of The Republic of Belarus: Statistical Yearbook of the Republic of Belarus 2005 (GLIMS data warehouse)                                                                                                                                                                                                                                          |
| Cambodia                         | 2009 | 2     | 5,122,207       | Department of Animal Production and Health, Cambodia: 2009 district data (David Bourn, "Environmental Animal Health Management Initiative for Enhanced Smallholder Production", 2010) (GLIMS data warehouse)                                                                                                                                                                         |
| China                            | 2005 | 6     | 931,845,945     | Editorial Department of China Animal Husbandry: China animal husbandry yearbook. Beijing, China: China Agricultural Press (GLIMS data warehouse)                                                                                                                                                                                                                                     |
| India                            | 2007 | 2     | 27,154,998      | Department of Animal Husbandry, Dairying & Fisheries, Ministry of Agriculture, India: Census of Agriculture, 2007 (GLIMS data warehouse)                                                                                                                                                                                                                                             |
| Indonesia                        | 2010 | 1     | 44,301,804      | Department Pertanian Republik Indonesia: Buku Statistik, 2011 (GLIMS data warehouse)                                                                                                                                                                                                                                                                                                 |
| Lao People's Democratic Republic | 2009 | 2     | 6,279,320       | Department of Livestock and Fisheries, Laos: 2009 district data (David Bourn, "Environmental Animal Health Management Initiative for Enhanced Smallholder Production" , 2010) (GLIMS data warehouse)                                                                                                                                                                                 |
| Malaysia                         | 2001 | 1     | 6,013,621       | Department of Veterinary Service, Malaysia: Livestock Products statistics 1996-2002 (GLIMS data warehouse)                                                                                                                                                                                                                                                                           |
| Myanmar                          | 2006 | 6     | 9,745,621       | Livestock Breeding and Veterinary Department (LBVD), Ministry of Livestock Breeding and Fisheries, Yangon, Myanmar: Myanmar Animal Census 2006 (GLIMS data warehouse)                                                                                                                                                                                                                |
| Nepal                            | 2000 | 3     | 425,158         | Ministry of Agriculture and Co-operatives, Agri-Business and Statistics Division (GLIMS data warehouse)                                                                                                                                                                                                                                                                              |
| Pakistan                         | 1996 | 2     | 1,127,108       | Agricultural Census Organization, Ministry of Food & Agriculture, Pakistan: Livestock census 1996 - special report. Lahore, Pakistan (GLIMS data warehouse)                                                                                                                                                                                                                          |
| Philippines                      | 2006 | 3     | 7,739,879       | Bureau of Animal Industry, Philippines: 2006 data (David Bourn, "Environmental Animal Health Management Initiative for Enhanced Smallholder Production" , 2010) (GLIMS data warehouse)                                                                                                                                                                                               |
| Qatar                            | 2001 | 1     | 12,266          | Ministry of Municipal Affairs and Agriculture Department of Agriculture and Water Research: Agricultural Census 2000-2001 (GLIMS data warehouse)                                                                                                                                                                                                                                     |
| Republic of Korea                | 2004 | 1     | 8,265,580       | Korea National Statistical Office: Korea Statistical Yearbook 2005 (GLIMS data warehouse)                                                                                                                                                                                                                                                                                            |

|                    |      |   |            |                                                                                                                                                                                                                                                                                                        |
|--------------------|------|---|------------|--------------------------------------------------------------------------------------------------------------------------------------------------------------------------------------------------------------------------------------------------------------------------------------------------------|
| Romania            | 2002 | 6 | 3,897,538  | EUROSTAT on line database. Section: General Statistics, Region, Agriculture, Animal Populations and Land Use. February 2005. Online data:<br><a href="http://epp.eurostat.ec.europa.eu/portal/page/portal/agriculture/data/">http://epp.eurostat.ec.europa.eu/portal/page/portal/agriculture/data/</a> |
| Russian Federation | 2006 | 1 | 148,273    | Russian Federation - Federal State Statistical Service: Results of All-Russia Agricultural Census 2006 (1-8 vol.) (GLIMS data warehouse)                                                                                                                                                               |
| Sri Lanka          | 2002 | 2 | 23,940     | Agriculture and Environment Statistics Division, Department of Census and Statistics, Sri Lanka: Census of Agriculture 2002, All Sectors. Online data:<br><a href="http://www.statistics.gov.lk/agriculture/AGC2002/AGC2002.htm">http://www.statistics.gov.lk/agriculture/AGC2002/AGC2002.htm</a>      |
| Thailand           | 2004 | 3 | 32,620,489 | Department of Livestock Development, Ministry of Agriculture and Cooperatives, Thailand: Census 2004 (X- ray surveys searching for HPAI outbreaks) (GLIMS data warehouse)                                                                                                                              |
| Turkey             | 2009 | 2 | 413,523    | Turkish Statistical Institute: Livestock statistics database 2009 (GLIMS data warehouse)                                                                                                                                                                                                               |
| Ukraine            | 2009 | 1 | 8,743,007  | State Statistics Committee Ukraine: Head of livestock and poultry by regions (GLIMS data warehouse)                                                                                                                                                                                                    |
| Viet Nam           | 2001 | 6 | 60,758,232 | General Statistics Office of Vietnam: Agricultural Census database 2001. Online data:<br><a href="http://www.gso.gov.vn/default_en.aspx?tabid=477&amp;idmid=4&amp;ItemID=1824">http://www.gso.gov.vn/default_en.aspx?tabid=477&amp;idmid=4&amp;ItemID=1824</a>                                         |

---

No Data for: Armenia, Azerbaijan, Bahrain, Bhutan, Brunei Darussalam, Bulgaria, Christmas Island, Cocos (Keeling) Islands, Cyprus, Democratic People's Republic of Korea, Georgia, Islamic Republic of Iran, Iraq, Israel, Japan, Jordan, Kazakhstan, Kuril Islands, Kuwait, Kyrgyzstan, Lebanon, Liancourt Rock, Maldives, Mongolia, Oman, Paracel Islands, Republic of Moldova, Saudi Arabia, Scarborough Reef, Senkaku Islands, Singapore, Spratly Islands, Syrian Arab Republic, Tajikistan, Timor-Leste, Turkmenistan, United Arab Emirates, Uzbekistan, Yemen

## Europe Tile

| COUNTRY                | YEAR | LEVEL | Totals in GLIMS | SOURCE                                                                                                                                                                                                                                                                                                                                                              |
|------------------------|------|-------|-----------------|---------------------------------------------------------------------------------------------------------------------------------------------------------------------------------------------------------------------------------------------------------------------------------------------------------------------------------------------------------------------|
| Albania                | 2010 | 1     | 164,500         | Institute of Statics, Albania: Agricultural sector, Livestock 2001-2010 (GLIMS data warehouse)                                                                                                                                                                                                                                                                      |
| Austria                | 2010 | 1     | 3,134,156       | Statistics Austria: Livestock Survey, 2010 (GLIMS data warehouse)                                                                                                                                                                                                                                                                                                   |
| Belgium                | 2010 | 2     | 6,429,600       | EUROSTAT online database. General Statistics, Region, Agriculture, Animal Populations and Land Use. Online data: <a href="http://epp.eurostat.ec.europa.eu/portal/page/portal/agriculture/data/">http://epp.eurostat.ec.europa.eu/portal/page/portal/agriculture/data/</a>                                                                                          |
| Bosnia and Herzegovina | 2009 | 6     | 529,095         | Federal Office of Statistics of Federation of Bosnia and Herzegovina: Number of animals from Federal Agro-Mediterranean Institute of Mostar (GLIMS data warehouse)                                                                                                                                                                                                  |
| Croatia                | 2003 | 1     | 1,726,895       | Central Bureau of Statistics, Republic of Croatia: Agricultural Census 2003. Online data: <a href="http://www.dzs.hr/default_e.htm">http://www.dzs.hr/default_e.htm</a>                                                                                                                                                                                             |
| Czech Republic         | 2010 | 2     | 1,906,929       | Czech Statistical Office: Agrocensus regions: Farm Structure Survey and Survey on Agricultural Production Methods 2010. Online data: <a href="http://www.czso.cz/csu/2012edicniplan.nsf/engp/2127-12">http://www.czso.cz/csu/2012edicniplan.nsf/engp/2127-12</a>                                                                                                    |
| Denmark                | 2010 | 2     | 13,173,060      | Denmark Statistics: Farms by region and selected farms, crops and livestock. Online data: <a href="http://www.statistikbanken.dk/statbank5a/SelectVarVal/Define.asp?Maintable=BDF51&amp;PLanguage=1">http://www.statistikbanken.dk/statbank5a/SelectVarVal/Define.asp?Maintable=BDF51&amp;PLanguage=1</a>                                                           |
| Estonia                | 2001 | 2     | 327,195         | Statistikaamet Statistical Office of Estonia: Agricultural Census 2001. Online data: <a href="http://www.stat.ee/agricultural-census-2001">http://www.stat.ee/agricultural-census-2001</a>                                                                                                                                                                          |
| Finland                | 2010 | 6     | 1,366,800       | The Information Centre of the Ministry of Agriculture and Forestry, Finland: Yearbook of Farm Statistics 2011 (GLIMS data warehouse)                                                                                                                                                                                                                                |
| France                 | 2009 | 2     | 13,245,288      | Service de la Statistique et de la Prospective (SSP): Statistique Agricole Annuelle (GLIMS data warehouse)                                                                                                                                                                                                                                                          |
| Germany                | 2007 | 2     | 25,247,881      | Federal Statistical Office, Germany: GENESIS database. Online data: <a href="https://www.regionalstatistik.de/genesis/online/online;jsessionid=EE45147898822814978BE734145275C4?operation=sprachwechsel&amp;option=en">https://www.regionalstatistik.de/genesis/online/online;jsessionid=EE45147898822814978BE734145275C4?operation=sprachwechsel&amp;option=en</a> |
| Greece                 | 2007 | 2     | 1,111,540       | Hellenic Statistic Authority (EL.STAT): Farms and number of animals by type, region and county (GLIMS data warehouse)                                                                                                                                                                                                                                               |
| Hungary                | 2010 | 1     | 3,169,000       | Hungarian Central Statistical Office: Regional Statistics. Online data: <a href="http://www.ksh.hu/agriculture">http://www.ksh.hu/agriculture</a>                                                                                                                                                                                                                   |
| Iceland                | 2010 | 2     | 3,615           | Statistics Iceland: 2010 data (GLIMS data warehouse)                                                                                                                                                                                                                                                                                                                |
| Ireland                | 2000 | 1     | 1,722,108       | Central Statistical Office Ireland: Census of Agriculture 2000. Online data: <a href="http://www.cso.ie/en/releasesandpublications/agricultureandfishing/censusofagriculturemainresultsjune2000/">http://www.cso.ie/en/releasesandpublications/agricultureandfishing/censusofagriculturemainresultsjune2000/</a>                                                    |
| Italy                  | 2010 | 3     | 9,331,143       | Istituto Nazionale di Statistica: Censimento Agricoltura 2010. Online data: <a href="http://dati-censimentoagricoltura.istat.it">http://dati-censimentoagricoltura.istat.it</a>                                                                                                                                                                                     |
| Latvia                 | 2001 | 1     | 368,909         | Central Statistical Bureau of Latvia: Results of 2001 Agricultural Census. Online data: <a href="http://www.csb.gov.lv/en/dati/agricultural-census-2001-30765.html">http://www.csb.gov.lv/en/dati/agricultural-census-2001-30765.html</a>                                                                                                                           |

|                                           |      |   |            |                                                                                                                                                                                                                                                                                          |
|-------------------------------------------|------|---|------------|------------------------------------------------------------------------------------------------------------------------------------------------------------------------------------------------------------------------------------------------------------------------------------------|
| Liechtenstein                             | 2009 | 6 | 1,811      | Amt für Statistik Liechtenstein: Landwirtschaftsstatistik 2009 (GLIMS data warehouse)                                                                                                                                                                                                    |
| Lithuania                                 | 2010 | 2 | 942,163    | Lietuvos Statistikos Departamenta: Number of livestock by administrative territory, 2011 (GLIMS data warehouse)                                                                                                                                                                          |
| Luxembourg                                | 2008 | 2 | 77,841     | Portail des statistiques du Grand-Duché de Luxembourg (STATEC): Recensement Agricole 2008 (GLIMS data warehouse)                                                                                                                                                                         |
| Malta                                     | 2010 | 6 | 70,593     | National Statistics Office of Malta: Census of Agriculture 2010. Online data:<br><a href="http://www.nso.gov.mt/statdoc/document_view.aspx?id=3287&amp;backurl=/themes/theme_page.aspx">http://www.nso.gov.mt/statdoc/document_view.aspx?id=3287&amp;backurl=/themes/theme_page.aspx</a> |
| Montenegro                                | 2010 | 1 | 41,118     | Statistical office of Montenegro (MONSTAT): Agriculture Census 2010. Online data:<br><a href="http://www.monstat.org/eng/page.php?id=58&amp;pageid=58">http://www.monstat.org/eng/page.php?id=58&amp;pageid=58</a>                                                                       |
| Netherlands                               | 2010 | 2 | 12,254,972 | Centraal Bureau voor de Statistiek, Netherlands: Agriculture: crops, livestock and land use by general far type, region - 2011 (GLIMS data warehouse)                                                                                                                                    |
| Norway                                    | 2010 | 1 | 1,607,772  | Statistics Norway: Agriculture Statistics 2011 (GLIMS data warehouse)                                                                                                                                                                                                                    |
| Poland                                    | 2009 | 1 | 14,278,600 | Central Statistical Office, Poland: Statistical Yearbook of Agriculture 2010 (GLIMS data warehouse)                                                                                                                                                                                      |
| Portugal                                  | 2009 | 2 | 1,851,290  | Instituto Nacional de Estatística - Statistics Portugal: Agricultural Census 2009. Online data:<br><a href="http://ra09.ine.pt/xportal/xmain?xpid=RA2009&amp;xpgid=ra_home">http://ra09.ine.pt/xportal/xmain?xpid=RA2009&amp;xpgid=ra_home</a>                                           |
| Serbia                                    | 2006 | 1 | 3,998,927  | Statistical Office of Serbia: Municipalities of Serbia 2007 (GLIMS data warehouse)                                                                                                                                                                                                       |
| Slovakia                                  | 2009 | 2 | 740,862    | Statistical Office of the Slovak Republic: Livestock by territory, products and period. Online data:<br><a href="http://px-web.statistics.sk/PXWebSlovak/DATABASE/En/databasetree.asp">http://px-web.statistics.sk/PXWebSlovak/DATABASE/En/databasetree.asp</a>                          |
| Slovenia                                  | 2010 | 2 | 308,540    | Statistical Office of the Republic of Slovenia: Agricultural Census Slovenia 2010. Online data:<br><a href="http://www.stat.si/eng/novica_prikazi.aspx?id=4594">http://www.stat.si/eng/novica_prikazi.aspx?id=4594</a>                                                                   |
| Spain                                     | 2010 | 2 | 25,704,041 | Ministerio de Medio Ambiente y Medio Rural y Marino, Gobierno de España (MARM): Encuestas Ganaderas, 2010 (GLIMS data warehouse)                                                                                                                                                         |
| Sweden                                    | 2009 | 1 | 1,528,740  | Statistics Sweden: Yearbook of Agricultural Statistics 2010 (GLIMS data warehouse)                                                                                                                                                                                                       |
| Switzerland                               | 2009 | 1 | 1,557,204  | Swiss Federal Statistical Office: Recensement des entreprises agricoles,1999-2009 (GLIMS data warehouse)                                                                                                                                                                                 |
| The former Yugoslav Republic of Macedonia | 2006 | 2 | 173,185    | State Statistic Office of the Republic of Macedonia: Census of Agriculture 2007. Online data:<br><a href="http://www.stat.gov.mk/PrikaziPublikacija_en.aspx?id=51&amp;rbr=205">http://www.stat.gov.mk/PrikaziPublikacija_en.aspx?id=51&amp;rbr=205</a>                                   |
| United Kingdom                            | 2009 | 2 | 4,525,710  | Office for National Statistics, U.K.: Statistics by Region. Online data:<br><a href="http://www.statistics.gov.uk/hub/regional-statistics/">http://www.statistics.gov.uk/hub/regional-statistics/</a>                                                                                    |

No Data for: Andorra, Faroe Islands, Gibraltar, Guernsey, Holy See, Isle of Man, Jersey, Madeira Islands, Monaco, San Marino, Svalbard and Jan Mayen Islands



## North America Tile

| COUNTRY        | YEAR | LEVEL | Totals in GLIMS | SOURCE                                                                                                                                                                                                                                                                                                                                                                                               |
|----------------|------|-------|-----------------|------------------------------------------------------------------------------------------------------------------------------------------------------------------------------------------------------------------------------------------------------------------------------------------------------------------------------------------------------------------------------------------------------|
| Belize         | 2003 | 1     | 21,224          | Ministry Of Agriculture, Fisheries and Cooperatives, Belize: Annual Report 2003. Online data: <a href="http://www.agriculture.gov.bz/PDF/Annual_Report_2003.pdf">http://www.agriculture.gov.bz/PDF/Annual_Report_2003.pdf</a>                                                                                                                                                                        |
| Canada         | 2006 | 2     | 14,168,313      | Statistics Canada: 2006 Census of Agriculture. Online data: <a href="http://www.statcan.gc.ca/ca-ra2006/index-eng.htm">http://www.statcan.gc.ca/ca-ra2006/index-eng.htm</a>                                                                                                                                                                                                                          |
| Cayman Islands | 2009 | 1     | 1,063           | Economics and Statistics Office - Government of the Cayman Islands: Statistical Compendium 2009 (GLIMS data warehouse)                                                                                                                                                                                                                                                                               |
| Costa Rica     | 2006 | 1     | 297,359         | Ministerio de Agricultura y Ganadería, Costa Rica: Programa Nacional de Sanidad Porcina 2006 (GLIMS data warehouse)                                                                                                                                                                                                                                                                                  |
| El Salvador    | 2007 | 2     | 165,866         | Ministerio de Economía - El Salvador: IV Censo Agropecuario 2007-2008 (GLIMS data warehouse)                                                                                                                                                                                                                                                                                                         |
| Guadeloupe     | 2000 | 1     | 25,839          | Agreste la Statistique Agricole, Le Ministère de l'Agriculture, de l'Alimentation, de la Pêche et de la Ruralité, France: Recensement Agricole 2000. Online data: <a href="http://agreste.agriculture.gouv.fr/recensement-agricole-2010/resultats-donnees-chiffrees/">http://agreste.agriculture.gouv.fr/recensement-agricole-2010/resultats-donnees-chiffrees/</a>                                  |
| Guatemala      | 2003 | 2     | 419,170         | Instituto Nacional de Estadística, Guatemala: IV Censo Nacional Agropecuario 2003. Online data: <a href="http://www.ine.gob.gt/np/agropecuario/tomo%20IV.pdf">http://www.ine.gob.gt/np/agropecuario/tomo%20IV.pdf</a>                                                                                                                                                                                |
| Jamaica        | 2009 | 1     | 361,540         | Agricultural Business Information System, Jamaica: Livestock Summary Report, 2009 (GLIMS data warehouse)                                                                                                                                                                                                                                                                                             |
| Martinique     | 2000 | 1     | 20,621          | Agreste la Statistique Agricole, Le Ministère de l'Agriculture, de l'Alimentation, de la Pêche et de la Ruralité, France: Recensement Agricole 2000. Online data: <a href="http://agreste.agriculture.gouv.fr/recensement-agricole-2010/resultats-donnees-chiffrees/">http://agreste.agriculture.gouv.fr/recensement-agricole-2010/resultats-donnees-chiffrees/</a>                                  |
| Mexico         | 2007 | 2     | 8,964,101       | Instituto Nacional de Estadística Geografía e Informática, México: Censo Agrícola, Ganadero y Forestal 2007. Online data: <a href="http://www.inegi.org.mx/est/contenidos/proyectos/Agro/ca2007/Resultados_Agricola/default.aspx">http://www.inegi.org.mx/est/contenidos/proyectos/Agro/ca2007/Resultados_Agricola/default.aspx</a>                                                                  |
| Nicaragua      | 2001 | 2     | 383,172         | Instituto Nacional de Estadística y Censos, Nicaragua: III Censo Nacional Agropecuario, 2001 (GLIMS data warehouse)                                                                                                                                                                                                                                                                                  |
| Panama         | 2001 | 2     | 312,102         | Instituto Nacional de Estadística y Censo: Existencia de animales en la República, por clase de animal, según provincia: 21 de abril de 1991 al 22 abril de 2001. Online data: <a href="http://www.contraloria.gob.pa/inec/Avance/Avance.aspx?ID_CATEGORIA=2&amp;ID_CIFRAS=8&amp;ID_DIOMA=1">http://www.contraloria.gob.pa/inec/Avance/Avance.aspx?ID_CATEGORIA=2&amp;ID_CIFRAS=8&amp;ID_DIOMA=1</a> |
| Puerto Rico    | 2007 | 2     | 63,585          | National Agricultural Statistics Service - United States Department of Agriculture: National Agricultural Census 2007. Online data: <a href="http://www.agcensus.usda.gov/Publications/2007/Full_Report/">http://www.agcensus.usda.gov/Publications/2007/Full_Report/</a>                                                                                                                            |

|                                  |      |   |            |                                                                                                                                                                                                                                                                           |
|----------------------------------|------|---|------------|---------------------------------------------------------------------------------------------------------------------------------------------------------------------------------------------------------------------------------------------------------------------------|
| Saint Lucia                      | 2007 | 6 | 19,520     | Ministry of Agriculture, Forestry and Fisheries: Census of Agriculture - Final report 2007. Online data: <a href="http://www.govt.lc/www/publications/AgricultureCensus2007.pdf">http://www.govt.lc/www/publications/AgricultureCensus2007.pdf</a>                        |
| Saint Vincent and the Grenadines | 2000 | 1 | 4,807      | Ministry of Agriculture and Labour, Government of Saint Vincent and the Grenadines: National Agricultural Census 2000 (GLIMS data warehouse)                                                                                                                              |
| United States of America         | 2007 | 2 | 67,239,043 | National Agricultural Statistics Service - United States Department of Agriculture: National Agricultural Census 2007. Online data: <a href="http://www.agcensus.usda.gov/Publications/2007/Full_Report/">http://www.agcensus.usda.gov/Publications/2007/Full_Report/</a> |

---

No Data for: Anguilla, Antigua and Barbuda, Bahamas, Barbados, Bermuda, Bird Island, British Virgin Islands, Cuba, Dominica, Dominican Republic, Grenada, Haiti, Honduras, Montserrat, Netherlands Antilles, Saint Kitts and Nevis, Turks and Caicos Islands, United States Virgin Islands

**South America Tile (Data insufficient to run the regional model)**

| COUNTRY                           | YEAR | LEVEL | Totals in GLIMS | SOURCE                                                                                                                                                                               |
|-----------------------------------|------|-------|-----------------|--------------------------------------------------------------------------------------------------------------------------------------------------------------------------------------|
| Colombia                          | 2001 | 1     | 546,272         | Ministerio de Agricultura y Desarrollo Rural, Departamento Administrativo Nacional de Estadística, Colombia: Encuesta Nacional Agropecuaria - Resultados 2001 (GLIMS data warehouse) |
| Ecuador                           | 2000 | 2     | 351,945         | Project SICA, Agricultural Information System, Ministry of Agriculture and Livestock, Ecuador: III Censo Nacional Agropecuario (GLIMS data warehouse)                                |
| Paraguay                          | 2001 | 1     | 717,600         | Dirección General de Estadística, Encuestas y Censos: Anuario Estadístico 2001 (GLIMS data warehouse)                                                                                |
| Venezuela,<br>Bolivarian Republic | 2007 | 1     | 142,724         | Ministerio del Poder Popular para la Agricultura y Tierras - Venezuela: VII Censo Agrícola 2007. Online data: <a href="http://censo.mat.gob.ve/">http://censo.mat.gob.ve/</a>        |

No Data for: Argentina, Aruba, Plurinational State of Bolivia, Brazil, Chile, Falkland Islands (Malvinas), French Guiana, Guyana, Peru, Suriname, Trinidad and Tobago, Uruguay

## Oceania Tile

| COUNTRY                  | YEAR | LEVEL | Totals in GLIMS | SOURCE                                                                                                                                                                                                                                                                                                                                                                                                                                  |
|--------------------------|------|-------|-----------------|-----------------------------------------------------------------------------------------------------------------------------------------------------------------------------------------------------------------------------------------------------------------------------------------------------------------------------------------------------------------------------------------------------------------------------------------|
| Australia                | 2007 | 6     | 3,042,342       | Australian Bureau of Statistics: Agricultural commodities: small area data, Australia 2006-2007 (GLIMS data warehouse)                                                                                                                                                                                                                                                                                                                  |
| Cook Islands             | 2006 | 1     | 436             | Statistic Office: Census of Population Dwellings (2001 and 2006) (GLIMS data warehouse)                                                                                                                                                                                                                                                                                                                                                 |
| Fiji                     | 2009 | 2     | 72,486          | Department of Agriculture Economic Planning and Statistic Division: National Agricultural Census 2009 report . Online data :<br><a href="http://www.fao.org/fileadmin/templates/ess/ess_test_folder/World_Census_Agriculture/Country_info_2010/Reports/Reports_3/FJI_ENG_REP_2009.pdf">http://www.fao.org/fileadmin/templates/ess/ess_test_folder/World_Census_Agriculture/Country_info_2010/Reports/Reports_3/FJI_ENG_REP_2009.pdf</a> |
| New Caledonia            | 2002 | 2     | 9,844           | Institut de la Statistique et des Etudes Economiques (ISEE): Recensement Général Agricole (RGA) 2002. Online data:<br><a href="http://www.davar.gouv.nc/portal/page/portal/davar/secteur_rural/statistiques_agricoles/donnees_synthese/recensement_agricole">http://www.davar.gouv.nc/portal/page/portal/davar/secteur_rural/statistiques_agricoles/donnees_synthese/recensement_agricole</a>                                           |
| Northern Mariana Islands | 2007 | 1     | 189             | National Agricultural Statistics Service - United States Department of Agriculture: National Agricultural Census 2007. Online data: <a href="http://www.agcensus.usda.gov/Publications/2007/Full_Report/">http://www.agcensus.usda.gov/Publications/2007/Full_Report/</a>                                                                                                                                                               |
| Tonga                    | 2001 | 1     | 1,119           | Ministry of Agriculture and Forestry, Kingdom of Tonga: Agriculture Census 2001. Online data: <a href="http://www.spc.int/prism/tonga/index.php/surveys/agriculture-census-2011">http://www.spc.int/prism/tonga/index.php/surveys/agriculture-census-2011</a>                                                                                                                                                                           |
