# Supplementary material for: Mapping the Global Distribution of Livestock
Source: PubMed Central journal article supplement (PMC4038494; doi:10.1371/journal.pone.0096084), 2014-05-29
Supplement: pone.0096084.s006.pdf [file pone.0096084.s006.pdf]

**Supplementary information 6a** – Average Spatial Resolution (ASR) of the training data used to model a) cattle; b) pigs; c) chickens and d) ducks distributions. The ASR measures the effective resolution of input administrative units in kilometers. It is calculated as the square root of the land area divided by the number of administrative units [1,2].

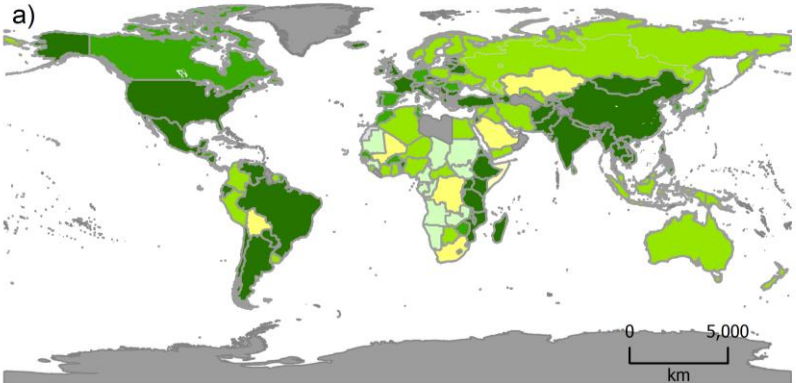

**ASR measure — Training data for the cattle model**

|                                                                                                       |                                                                                                             |                                                                                                         |                                                                                                     |
|-------------------------------------------------------------------------------------------------------|-------------------------------------------------------------------------------------------------------------|---------------------------------------------------------------------------------------------------------|-----------------------------------------------------------------------------------------------------|
| <span style="display:inline-block; width:10px; height:10px; background-color:darkgreen;"></span> < 10 | <span style="display:inline-block; width:10px; height:10px; background-color:lightgreen;"></span> 21 — 50   | <span style="display:inline-block; width:10px; height:10px; background-color:yellow;"></span> 101 — 150 | <span style="display:inline-block; width:10px; height:10px; background-color:gray;"></span> No Data |
| <span style="display:inline-block; width:10px; height:10px; background-color:green;"></span> 11 — 20  | <span style="display:inline-block; width:10px; height:10px; background-color:lightyellow;"></span> 51 — 100 | <span style="display:inline-block; width:10px; height:10px; background-color:orange;"></span> > 150     |                                                                                                     |

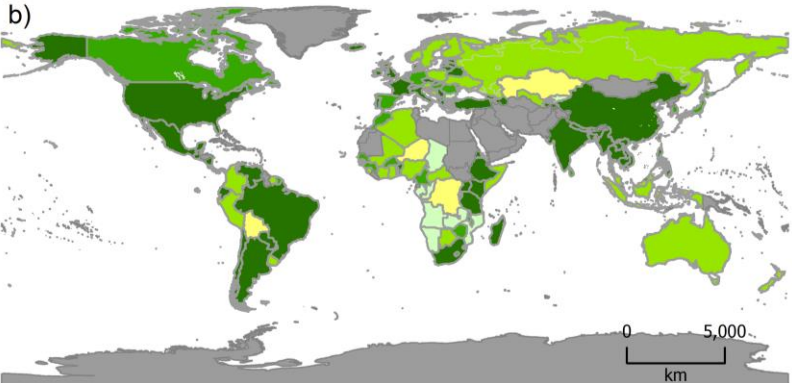

**ASR measure — Training data for the pigs model**

|                                                                                                       |                                                                                                             |                                                                                                         |                                                                                                     |
|-------------------------------------------------------------------------------------------------------|-------------------------------------------------------------------------------------------------------------|---------------------------------------------------------------------------------------------------------|-----------------------------------------------------------------------------------------------------|
| <span style="display:inline-block; width:10px; height:10px; background-color:darkgreen;"></span> < 10 | <span style="display:inline-block; width:10px; height:10px; background-color:lightgreen;"></span> 21 — 50   | <span style="display:inline-block; width:10px; height:10px; background-color:yellow;"></span> 101 — 150 | <span style="display:inline-block; width:10px; height:10px; background-color:gray;"></span> No Data |
| <span style="display:inline-block; width:10px; height:10px; background-color:green;"></span> 11 — 20  | <span style="display:inline-block; width:10px; height:10px; background-color:lightyellow;"></span> 51 — 100 | <span style="display:inline-block; width:10px; height:10px; background-color:orange;"></span> > 150     |                                                                                                     |

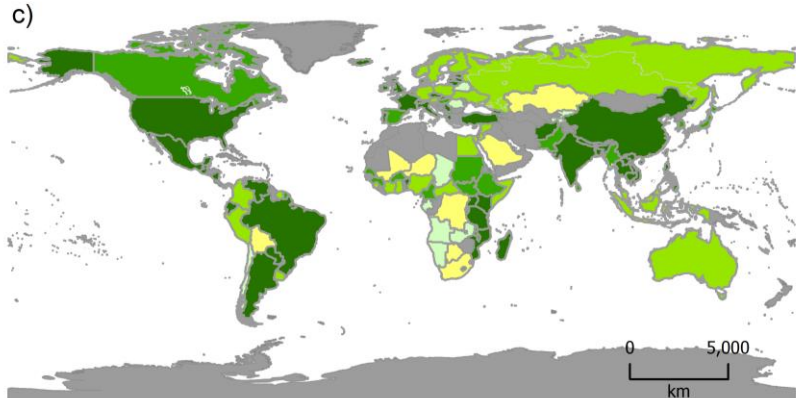

**ASR measure — Training data for the chickens model**

|                                                                                                       |                                                                                                             |                                                                                                         |                                                                                                     |
|-------------------------------------------------------------------------------------------------------|-------------------------------------------------------------------------------------------------------------|---------------------------------------------------------------------------------------------------------|-----------------------------------------------------------------------------------------------------|
| <span style="display:inline-block; width:10px; height:10px; background-color:darkgreen;"></span> < 10 | <span style="display:inline-block; width:10px; height:10px; background-color:lightgreen;"></span> 21 — 50   | <span style="display:inline-block; width:10px; height:10px; background-color:yellow;"></span> 101 — 150 | <span style="display:inline-block; width:10px; height:10px; background-color:gray;"></span> No Data |
| <span style="display:inline-block; width:10px; height:10px; background-color:green;"></span> 11 — 20  | <span style="display:inline-block; width:10px; height:10px; background-color:lightyellow;"></span> 51 — 100 | <span style="display:inline-block; width:10px; height:10px; background-color:orange;"></span> > 150     |                                                                                                     |

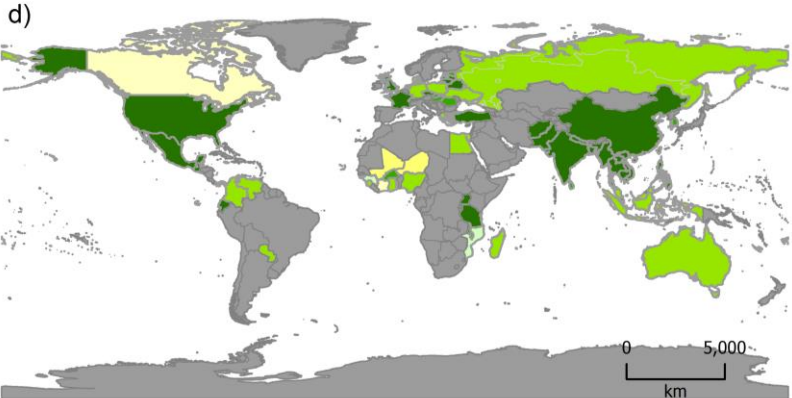

**ASR measure — Training data for the ducks model**

|                                                                                                       |                                                                                                             |                                                                                                         |                                                                                                     |
|-------------------------------------------------------------------------------------------------------|-------------------------------------------------------------------------------------------------------------|---------------------------------------------------------------------------------------------------------|-----------------------------------------------------------------------------------------------------|
| <span style="display:inline-block; width:10px; height:10px; background-color:darkgreen;"></span> < 10 | <span style="display:inline-block; width:10px; height:10px; background-color:lightgreen;"></span> 21 — 50   | <span style="display:inline-block; width:10px; height:10px; background-color:yellow;"></span> 101 — 150 | <span style="display:inline-block; width:10px; height:10px; background-color:gray;"></span> No Data |
| <span style="display:inline-block; width:10px; height:10px; background-color:green;"></span> 11 — 20  | <span style="display:inline-block; width:10px; height:10px; background-color:lightyellow;"></span> 51 — 100 | <span style="display:inline-block; width:10px; height:10px; background-color:orange;"></span> > 150     |                                                                                                     |

Supplementary information 6b – Country level of detail for the training data of a) cattle; b) pigs; c) chickens and d) ducks.

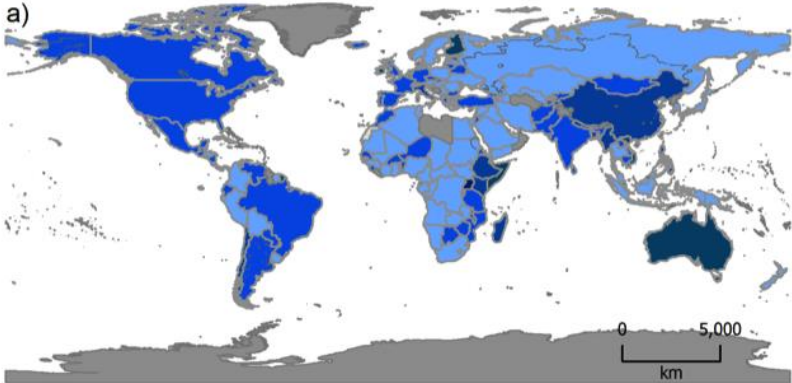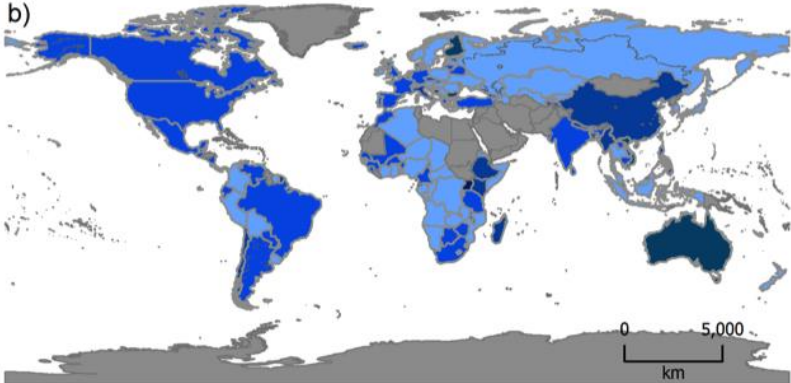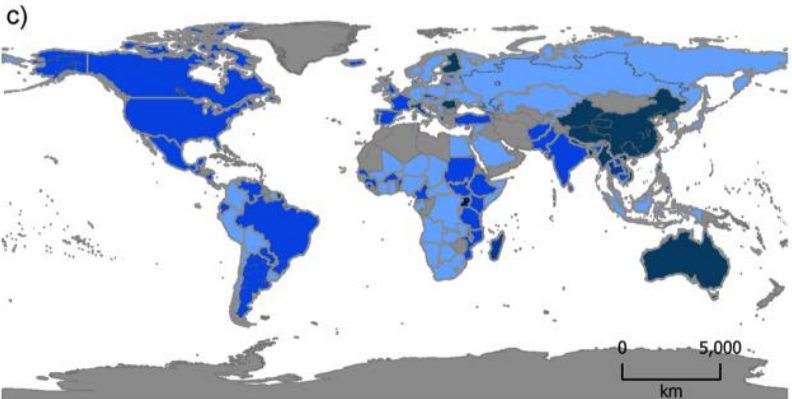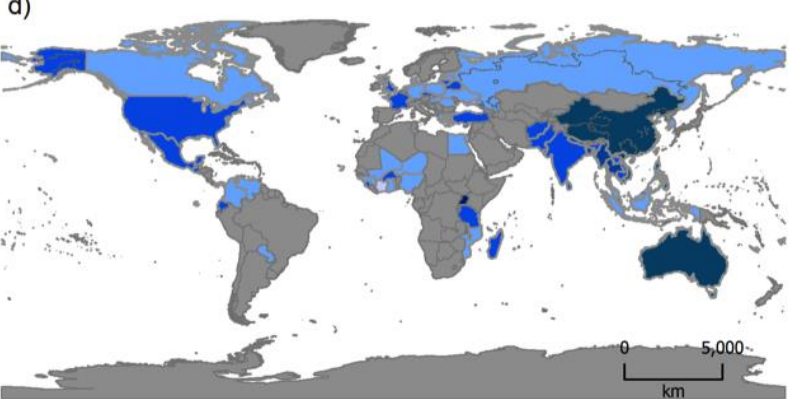

## References

1. Balk D, G Y (2004) The Global Distribution of Population: Evaluating the gains in resolution refinement. Available at: [http://sedac.ciesin.columbia.edu/downloads/docs/gpw-v3/gpw3\\_documentation\\_final.pdf](http://sedac.ciesin.columbia.edu/downloads/docs/gpw-v3/gpw3_documentation_final.pdf). Accessed 2014 February 24.
2. Linard C, Gilbert M, Snow RW, Noor AM, Tatem AJ (2012) Population Distribution, Settlement Patterns and Accessibility across Africa in 2010. PLoS ONE 7: e31743.
