# Supplementary material for: Mapping the Global Distribution of Livestock
Source: PubMed Central journal article supplement (PMC4038494; doi:10.1371/journal.pone.0096084), 2014-05-29
Supplement: pone.0096084.s007.pdf [file pone.0096084.s007.pdf]

Supplementary information 7 – Polygon details and processing time for each continental tile and species.

| Tile                 | Species  | Total polygons | Polygons with no data | Polygons with 0 values* | Processing time in hours** |
|----------------------|----------|----------------|-----------------------|-------------------------|----------------------------|
| <b>Africa</b>        | Cattle   | 7,658          | 836                   | 922                     | 98                         |
|                      | Chickens | 6,760          | 300                   | 28                      | 57                         |
|                      | Pigs     | 7,992          | 308                   | 2,253                   | 30                         |
|                      | Ducks    | n.a.           | n.a.                  | n.a.                    | n.a.                       |
| <b>Asia</b>          | Cattle   | 19,506         | 258                   | 1,342                   | 210                        |
|                      | Chickens | 23,870         | 253                   | 746                     | 136                        |
|                      | Pigs     | 17,802         | 1,124                 | 838                     | 184                        |
|                      | Ducks    | 23,887         | 300                   | 1,223                   | 173                        |
| <b>Europe</b>        | Cattle   | 13,857         | 91                    | 1,391                   | 48                         |
|                      | Chickens | 9,741          | 34                    | 3,499                   | 25                         |
|                      | Pigs     | 9,981          | 149                   | 3,290                   | 25                         |
|                      | Ducks    | 636            | 128                   | 7                       | 17                         |
| <b>North America</b> | Cattle   | 6,902          | 173                   | 37                      | 114                        |
|                      | Chickens | 6,827          | 475                   | 258                     | 144                        |
|                      | Pigs     | 6,839          | 658                   | 270                     | 139                        |
|                      | Ducks    | 6,308          | 867                   | 2,111                   | 54                         |
| <b>Oceania</b>       | Cattle   | 1,744          | 51                    | 26                      | 27                         |
|                      | Chickens | 1,747          | 128                   | --                      | 46                         |
|                      | Pigs     | 275            | 51                    | 9                       | 18                         |
|                      | Ducks    | 1,760          | 50                    | 154                     | 25                         |
| <b>South America</b> | Cattle   | 7,217          | 145                   | 81                      | 71                         |
|                      | Chickens | 6,914          | 591                   | --                      | 128                        |
|                      | Pigs     | 7,217          | 133                   | 148                     | 64                         |
|                      | Ducks    | n.a.           | n.a.                  | n.a.                    | n.a.                       |

\* In the chicken model, polygons with 0 value are treated as no data in the training data file, on the assumption that at least some chickens are present in every polygon; zero values are more likely to be data gaps than reliable reports. \*\*Models were run on 4 dedicated DELL machines with installed 64-bit Microsoft Windows Vista™ OS – 8 GB of RAM – and Intel(R) Core(TM)2 QUAD CPU.
